# Supplementary material for: Cryptocurrencies Impact on Accounting: Bibliometric Review
Source: Preprints.org preprint supplement (doi:10.20944/preprints202403.1002.v2), 2024-05-20
Supplement: Supplementary file 1 [file supplementary]

## Sheet: combined_R_157
	AF	AU	CR	AB	BE	BN	C1	DE	DI	DT	ID	J9	JI	LA	PU	PY	RP	SN	SO	TC	TI	VL	DB	AU_UN	AU1_UN	AU_UN_NR	SR_FULL	SR
ABDENNADHER S, 2022, J FINANC REPORT ACCO	ABDENNADHER S; GRASSA R; ABDULLA H; ALFALASI A	ABDENNADHER, SONIA; GRASSA, RIHAB; ABDULLA, HAREB; ALFALASI, ABDULLA	ANONYMOUS, 2000, CAS STUD; ANONYMOUS, 2016, BLOCKCHAIN TECHNOLOGY: A GAME-CHANGER IN ACCOUNTING? AVAILABLE AT; ASSOCIATION OF CHARTERED CERTIFIED ACCOUNTANTS, 2017, DIV WE FALL DISTR WE; BANKER R, 2002, JOURNAL OF INFORMATION SYSTEMS, V16, P209, DOI 10.2308/JIS.2002.16.2.209; BRAZEL J, 2007, CONTEMP ACCOUNT RES, V24, P1059, DOI 10.1506/CAR.24.4.1; BRAZEL J, 2005, MANAG AUDIT J, V20, P619, DOI 10.…	PURPOSE BLOCKCHAIN LOOKS TO BE THE NEXT STEP OF TECHNOLOGY TRANSFORMATION AND WOULD REDESIGN THE BUSINESS LANDSCAPE. IT IS EXPECTED TO HAVE AN IMPACT ON BUSINESS METHODS IN THE NEXT FEW YEARS; WHICH ADD NEW CHALLENGES AND COMPLEXITY TO THE ACCOUNTING AND ASSURANCE PROFESSION. THIS PAPER AIMS TO ANALYZE THE PERCEPTIONS OF ACCOUNTANTS AND AUDITORS TOWARD THE IMPLEMENTATION OF BLOCKCHAIN TECHNOLOGY …	#N/A	#N/A	HIGHER COLLEGE TECHNOLOGY, ABU DHABI, UNITED ARAB EMIRATES;	ACCOUNTING; BLOCKCHAIN; ASSURANCE; AUDITING	10.1108/JFRA-05-2020-0151	ARTICLE	INTERNET	J FINANC REPORT ACCO	J. FINANC. REPORT ACCOOUNT.	ENGLISH	EMERALD GROUP PUBLISHING LTD	2022	GRASSA, R (CORRESPONDING AUTHOR), HIGHER COLL TECHNOL, ABU DHABI, U ARAB EMIRATES.	1985-2517	JOURNAL OF FINANCIAL REPORTING AND ACCOUNTING	7	THE EFFECTS OF BLOCKCHAIN TECHNOLOGY ON THE ACCOUNTING AND ASSURANCE PROFESSION IN THE UAE AN EXPLORATORY STUDY	20	ISI	HIGHER COLLEGES OF TECHNOLOGY	HIGHER COLL TECHNOL	#N/A	ABDENNADHER S, 2022, J FINANC REPORT ACCO	ABDENNADHER S, 2022, J FINANC REPORT ACCO
ADAMS MT, 2021, ATA J LEG TAX RES	ADAMS M; BAILEY W	ADAMS, MOLLIE T.; BAILEY, WILLIAM A.	BRATSPIES R, 2018, CRYPTOCURRENCY MYTH; CLARK J, 2017, ACM QUEUE, V15; COIN_JUNKIE, 2018, REDDIT 0201; DANIELS R, 2016, CPA J; DECHERT L, 2017, US COINB VIRT CURR H; HILEMAN G, 2017, J EC LIT; HOCHMAN N, 2018, LOS ANGELES LAWYER, V41, P14; LEWIS A, 2018, THE BASICS OF BITCOINS AND BLOCKCHAINS AN INTRODUCTION TO CRYPTOCURRENCIES AND THE TECHNOLOGY THAT POWERS THEM; MAZZA S, 2003, U KAN L REV, V51,…	TO PROTECT THE PRIVACY AND OTHER CIVIL LIBERTIES OF CITIZENS, FEDERAL COURTS PLACE LIMITS ON THE POWER AND ACTIONS OF GOVERNMENT. THESE LIMITS CREATE A NEED FOR BALANCE BETWEEN THE IRS' MISSION OF TAX LAW ENFORCEMENT AND TAXPAYERS' PRIVACY RIGHTS. A MUCH-WATCHED CONTEMPORARY LOWER COURT CASE INTERSECTING CRYPTOCURRENCIES, SUMMONS POWER, AND TAXPAYER PRIVACY IS COINBASE V. U.S. THERE, THE IRS SOUG…	#N/A	#N/A	BRADLEY UNIVERSITY, FOSTER COLL BUSINESS, DEPT ACCOUNTING, PEORIA, IL 61625, USA;	CRYPTOCURRENCY; PRIVACY; SUMMONS; TAXATION	10.2308/JLTR-2020-007	ARTICLE	#N/A	ATA J LEG TAX RES	ATA J. LEG. TAX RES.	ENGLISH	AMER ACCOUNTING ASSOC	2021	ADAMS, MT (CORRESPONDING AUTHOR), BRADLEY UNIV, FOSTER COLL BUSINESS, DEPT ACCOUNTING, PEORIA, IL 61625 USA.	1543-866X	ATA JOURNAL OF LEGAL TAX RESEARCH	4	EMERGING CRYPTOCURRENCIES AND IRS SUMMONS POWER STRIKING THE PROPER BALANCE BETWEEN IRS AUDIT AUTHORITY AND TAXPAYER PRIVACY	19	ISI	BRADLEY UNIVERSITY	BRADLEY UNIV	#N/A	ADAMS MT, 2021, ATA J LEG TAX RES	ADAMS MT, 2021, ATA J LEG TAX RES
ADELOWOTAN M, 2021, ACAD ACCOUNT FINANC STUD J	ADELOWOTAN M; COETSEE D	ADELOWOTAN MICHAEL; COETSEE DANIEL	none	PURPOSE - THE ARTICLE DISCUSSES THE POSSIBLE IMPLICATIONS OF BLOCKCHAIN FOR ACCOUNTING PRACTICE AND WHAT FURTHER DEVELOPMENTS ARE NEEDED TO CREATE AN INTEGRATED ACCOUNTING SYSTEM ON BLOCKCHAIN TECHNOLOGY. THE FOCUS IS ON BOTH ACCOUNTING AND AUDITING.APPROACH – THE ARTICLE FOLLOWS A STRUCTURE APPROACH BY IDENTIFYING CHARACTERISTICS OF BLOCKCHAIN TECHNOLOGY TO DISCUSS THE IMPLICATIONS FOR ACCOUNTIN…	#N/A	#N/A	UNIVERSITY JOHANNESBURG, SOUTH AFRICA;	ACCOUNTING; AUDITING; BLOCKCHAIN; CRYPTOGRAPHY; DISTRIBUTED LEDGER TECHNOLOGY; PEER-TO-PEER NETWORK; SMART CONTRACT; TRIPLE-ENTRY ACCOUNTING	#N/A	ARTICLE	#N/A	ACAD ACCOUNT FINANC STUD J	ACAD. ACCOUNT. FINANC. STUD. J.	ENGLISH	ALLIED BUSINESS ACADEMIES	2021	#N/A	10963685	ACADEMY OF ACCOUNTING AND FINANCIAL STUDIES JOURNAL	2	BLOCKCHAIN TECHNOLOGY AND IMPLICATIONS FOR ACCOUNTING PRACTICE	25	ISI	UNIVERSITY OF JOHANNESBURG	UNIVERSITY OF JOHANNESBURG	#N/A	ADELOWOTAN M, 2021, ACAD ACCOUNT FINANC STUD J	ADELOWOTAN M, 2021, ACAD ACCOUNT FINANC STUD J
ALAMAD S, 2019, FINANCIAL AND ACCOUNT PRINCIPLES IN ISLAMIC FINANCE	ALAMAD S	ALAMAD SAMIR	none	THIS BOOK PROVIDES AN ORIGINAL ACCOUNT DETAILING THE ORIGINS AND COMPONENTS OF A FAITH-BASED ACCOUNTING SYSTEM THAT WAS FOUNDED AROUND 629 CE. BY EXAMINING THE HISTORICAL DEVELOPMENT THAT THE ACCOUNTING SYSTEMS UNDERWENT WITHIN THE CONTEXT OF FAITH-BASED RULES AND VALUES, THE BOOK EXPLAINS WHAT IS MEANT BY THE TERM “FAITH-BASED ACCOUNTING”, TOGETHER WITH A DISCUSSION OF ITS CHARACTERISTICS IN REL…	#N/A	978-303016299-3; 978-303016298-6	AL RAYAN BANK, BIRMINGHAM, UNITED KINGDOM;	ACCOUNTING; BANKING; FINANCIAL REPORTING; ICAAP; IFRS; ILAAP; FINANCE; COMPLIANCE	10.1007/978-3-030-16299-3	BOOK	#N/A	FINANCIAL AND ACCOUNT PRINCIPLES IN ISLAMIC FINANCE	FINANCIAL AND ACCOUNT. PRINCIPLES IN ISLAMIC FINANCE	ENGLISH	SPRINGER INTERNATIONAL PUBLISHING	2019	#N/A	#N/A	FINANCIAL AND ACCOUNTING PRINCIPLES IN ISLAMIC FINANCE	10	FINANCIAL AND ACCOUNTING PRINCIPLES IN ISLAMIC FINANCE	#N/A	ISI	#N/A	NOTREPORTED	#N/A	ALAMAD S, 2019, FINANCIAL AND ACCOUNT PRINCIPLES IN ISLAMIC FINANCE	ALAMAD S, 2019, FINANCIAL AND ACCOUNT PRINCIPLES IN ISLAMIC FINANCE
ALHASANA KAH, 2022, FINANC CREDIT ACT	ALHASANA K; ALROWWAD A	ALHASANA, KHALED AHMAD HAROUN; ALROWWAD, ANAS MOHAMMAD MOUSA	AICPA, 2020, ACCOUNT AUDIT ACCOUN; AL-HTAYBAT K, 2017, ACCOUNT AUDIT ACCOUN, V30, P850, DOI 10.1108/AAAJ-07-2015-2139; BONOLLO E, 2017, L N INF SYST ORGAN, V20, P317, DOI 10.1007/978-3-319-49538-5_21; DELOITTE, 2021, OPP AW CRYPT ASS INV; EY, 2020, APPL IFRS ACC HOLD C; FRADEANI A, 2018, L N INF SYST ORGAN, V24, P207, DOI 10.1007/978-3-319-62636-9_14; INTERNAL REVENUE SERVICE (IRS), 2019, REV RUL…	THE PAPER OFFERS THE AUTHOR'S VIEW ON NATIONAL ACCOUNTING AND REPORTING STANDARDS IN THE CONTEXT OF ECONOMY'S DIGITALIZATION. THE KEY TRENDS OF DIGITALIZATION AND ITS IMPACT ON ACCOUNTING ARE CONSIDERED - BOTH GLOBALLY AND IN UKRAINE. THE LEADING TECHNOLOGIES THAT HAVE EMERGED AS A RESULT OF THE DIGITALIZATION TREND AND THEIR IMPACT ON ACCOUNTING AND REPORTING ARE HIGHLIGHTED. EXAMPLES OF BEST PR…	#N/A	#N/A	AL BALQA APPL UNIVERSITY, DEPT ADM & FINANCIAL SCI, SALT, JORDAN;	ACCOUNTING STANDARDS; DIGITALIZATION; BLOCKCHAIN; CRYPTO ASSETS; TOKEN	#N/A	ARTICLE	#N/A	FINANC CREDIT ACT	FINANC. CREDIT ACT.	ENGLISH	FINTECHALIANCE	2022	ALHASANA, KAH (CORRESPONDING AUTHOR), AL BALQA APPL UNIV, DEPT ADM & FINANCIAL SCI, SALT, JORDAN.	2306-4994	FINANCIAL AND CREDIT ACTIVITY-PROBLEMS OF THEORY AND PRACTICE	2	NATIONAL STANDARDS OF ACCOUNTING AND REPORTING IN THE ERA OF DIGITALIZATION OF THE ECONOMY	1	ISI	AL-BALQA APPLIED UNIVERSITY	AL BALQA APPL UNIV	#N/A	ALHASANA KAH, 2022, FINANC CREDIT ACT	ALHASANA KAH, 2022, FINANC CREDIT ACT
AL-HTAYBAT K, 2019, J INTELLECT CAP	AL-HTAYBAT K; HUTAIBAT K; VON AL	AL-HTAYBAT, KHALDOON; HUTAIBAT, KHALED; VON ALBERTI-ALHTAYBAT, LARISSA	ABHAYAWANSA S, 2019, J INTELLECT CAP, V20, P2, DOI 10.1108/JIC-01-2019-223; ADAMS C, 2017, THE SUSTAINABLE DEVELOPMENT GOALS, INTEGRATED THINKING AND THE INTEGRATED REPORT; AL-HTAYBAT K, 2017, ACCOUNT AUDIT ACCOUN, V30, P850, DOI 10.1108/AAAJ-07-2015-2139; ALBERTI-ALHTAYBAT L, 2019, J BUS RES, V94, P400, DOI 10.1016/J.JBUSRES.2017.11.037; ANONYMOUS, 2005, RES METHODS ANTHR QU; ANONYMOUS, 2016, BL…	PURPOSE THE PURPOSE OF THIS PAPER IS TO EXPLORE THE INTERSECTION OF ACCOUNTING PRACTICES AND NEW TECHNOLOGIES IN THE AGE OF AGILITY AS A FORM OF INTELLECTUAL CAPITAL, THROUGH SHARING THE CONCEPTUALIZATION AND REAL IMPLICATIONS OF ACCOUNTING AND ACCOUNTABILITY IDEAS IN EXPLORING AND DEPLOYING NEW TECHNOLOGIES, SUCH AS BIG DATA ANALYTICS, BLOCKCHAIN AND AUGMENTED ACCOUNTING PRACTICES AND EXPOUNDING…	#N/A	#N/A	KING ABDULAZIZ UNIVERSITY, DEPT ACCOUNTING, JEDDAH, SAUDI ARABIA; MUTAH UNIVERSITY, AL KARAK, JORDAN; PRINCE MOHAMMAD BIN SALMAN COLL BUSINESS & ENTREP, KING ABDULLAH ECONOMIC C, SAUDI ARABIA;	SUSTAINABLE DEVELOPMENT; VALUE CREATION; INTELLECTUAL CAPITAL; BLOCKCHAIN; AUGMENTED REALITY; GLOBAL BRAIN DISTRIBUTED NETWORK	10.1108/JIC-01-2019-0016	ARTICLE	BIG DATA; SHARING ECONOMY; TECHNOLOGY; KNOWLEDGE; BITCOIN; FUTURE; WAVE; AGE	J INTELLECT CAP	J. INTELLECT. CAP.	ENGLISH	EMERALD GROUP PUBLISHING LTD	2019	VON ALBERTI-ALHTAYBAT, L (CORRESPONDING AUTHOR), PRINCE MOHAMMAD BIN SALMAN COLL BUSINESS & ENTREP, KING ABDULLAH ECONOMIC C, SAUDI ARABIA.	1469-1930	JOURNAL OF INTELLECTUAL CAPITAL	18	GLOBAL BRAINREFLECTIVE ACCOUNTING PRACTICES FORMS OF INTELLECTUAL CAPITAL CONTRIBUTING TO VALUE CREATION AND SUSTAINABLE DEVELOPMENT	20	ISI	KING ABDULAZIZ UNIVERSITY; MUTAH UNIVERSITY; PRINCE MOHAMMED BIN SALMAN COLLEGE OF BUSINESS AND ENTREPRENEURSHIP	PRINCE MOHAMMAD BIN SALMAN COLL BUSINESS AND ENTREP	#N/A	AL-HTAYBAT K, 2019, J INTELLECT CAP	AL-HTAYBAT K, 2019, J INTELLECT CAP
ALLES M, 2020, INFORMATION FOR EFFICIENT DECISION MAK: BIG DATA, BLOCKCHAIN AND RELEVANCE	ALLES M; GRAY G	ALLES MICHAEL; GRAY GLEN L	none	BUILDING ON THE WORK WE HAVE DONE IN ALLES AND GRAY (2019A, 2019B), IN THIS CHAPTER WE TRY TO PROVIDE A MORE BALANCED PERSPECTIVE ON BLOCKCHAIN, EXPLAINING TO AN ACCOUNTING AUDIENCE WHY THIS TECHNOLOGY HAS BOTH MUCH TO CONTRIBUTE AND WHAT ITS CAVEATS ARE. WE WILL COVER THE BASICS OF THE TECHNOLOGY UNDERLYING BLOCKCHAIN, EXPLAIN ITS RELATION TO BITCOIN, AND DO SO WITH A PARTICULAR REFERENCE TO WHA…	#N/A	978-981122047-0	RUTGERS STATE UNIVERSITY, RUTGERS BUSINESS SCHOOL, DEPARTMENT OF ACCOUNTING AND INFORMATION SYSTEMS, ONE WASHINGTON PARK, ROOM 928, NEWARK, 07102-3122, NJ, USA; CALIFORNIA STATE UNIVERSITY, DEPARTMENT OF ACCOUNTING AND INFORMATION SYSTEMS, COLLEGE OF BUSINESS AND ECONOMICS, 18111 NORDHOFF STREET, NORTHRIDGE, 91330-8372, CA, USA;	AUDITING; BITCOIN; BLOCKCHAIN; DISTRIBUTED LEDGER TECHNOLOGY	10.1142/9789811220470_0007	BOOK CHAPTER	#N/A	INFORMATION FOR EFFICIENT DECISION MAK: BIG DATA, BLOCKCHAIN AND RELEVANCE	INFORMATION FOR EFFICIENT DECISION MAK.: BIG DATA, BLOCKCHAIN AND RELEVANCE	ENGLISH	WORLD SCIENTIFIC PUBLISHING CO.	2020	#N/A	#N/A	INFORMATION FOR EFFICIENT DECISION MAKING: BIG DATA, BLOCKCHAIN AND RELEVANCE	1	WHAT ACCOUNTANTS NEED TO KNOW ABOUT BLOCKCHAIN	#N/A	ISI	RUTGERS BUSINESS SCHOOL;CALIFORNIA STATE UNIVERSITY	RUTGERS BUSINESS SCHOOL;CALIFORNIA STATE UNIVERSITY	#N/A	ALLES M, 2020, INFORMATION FOR EFFICIENT DECISION MAK: BIG DATA, BLOCKCHAIN AND RELEVANCE	ALLES M, 2020, INFORMATION FOR EFFICIENT DECISION MAK: BIG DATA, BLOCKCHAIN AND RELEVANCE
ALLES M, 2023, INT J DIGIT ACCOUNT RES	ALLES M; GRAY G	ALLES MICHAEL; GRAY GLEN L	none	GARTNER’S HYPE CYCLE OF TECHNOLOGY FAMOUSLY PROGRESSES FROM THE “PEAK OF INFLATED EXPECTATIONS” TO THE “PLATEAU OF PRODUCTIVITY” VIA THE “TROUGH OF DISILLUSIONMENT”. ACCOUNTING RESEARCHERS AND PRACTITIONERS—LIKE RESEARCHERS AND PRACTITIONERS IN MANY OTHER FIELDS—HAVE JUMPED ONTO THE BLOCKCHAIN BANDWAGON FOR FEAR OF MISSING OUT ON WHAT HAS BEEN HAILED AS A WORLD CHANGING TECHNOLOGY. UNFORTUNATELY,…	#N/A	#N/A	RUTGERS STATE UNIVERSITY, RUTGERS BUSINESS SCHOOL, UNITED STATES; CALIFORNIA STATE UNIVERSITY, USA;	AUDITING; BITCOIN; BLOCKCHAIN; COST	10.4192/1577-8517-v23_2	ARTICLE	#N/A	INT J DIGIT ACCOUNT RES	INT. J. DIGIT. ACCOUNT. RES.	ENGLISH	UNIVERSIDAD DE HUELVA	2023	#N/A	15778517	INTERNATIONAL JOURNAL OF DIGITAL ACCOUNTING RESEARCH	3	HOPE OR HYPE BLOCKCHAIN AND ACCOUNTING	23	ISI	RUTGERS BUSINESS SCHOOL;CALIFORNIA STATE UNIVERSITY	RUTGERS BUSINESS SCHOOL;CALIFORNIA STATE UNIVERSITY	#N/A	ALLES M, 2023, INT J DIGIT ACCOUNT RES	ALLES M, 2023, INT J DIGIT ACCOUNT RES
ALSALMI N, 2023, RES INT BUS FINANC	ALSALMI N; ULLAH S; RAFIQUE M	ALSALMI, NOORA; ULLAH, SUBHAN; RAFIQUE, MUHAMMAD	AICPA, 2020, ACCOUNT AUDIT ACCOUN; ANONYMOUS, 2014, EBA WARN OP VIRT CUR; ANONYMOUS, 2015, VIRT CURR SCH FURTH; ATLANTIC COUNCIL, 2021, CENTRL BANK DIG CURR; BANK FOR INTERNATIONAL SETTLEMENTS, 2018, CENTRL BANK DIG CURR; BANK OF RUSSIA, 2022, CRYPT TRENDS RISKS R; BECH M, 2017, BIS QUARTERLY REVIEW; BOAR C, 2020, BIS PAPER; CAI C, 2021, ACCOUNT FINANC, V61, P71, DOI 10.1111/ACFI.12556; CHUEN D, …	THE PURPOSE OF THIS PAPER IS TWOFOLD: (I) TO INVESTIGATE SOME OF THE MAIN ISSUES SURROUNDING THE CLASSIFICATION OF DIGITAL CURRENCIES, AND (II) TO IDENTIFY THE ACCOUNTING PRACTICES AND STANDARDS TIED TO DIGITAL CURRENCIES. THIS PAPER DISCUSSES TWO DIFFERENT TYPES OF DIGITAL CURRENCIES, INCLUDING: CENTRAL BANK DIGITAL CURRENCIES (CBDCS) AND PRIVATELY ISSUED CRYPTOCURRENCIES SUCH AS BITCOIN. THE FI…	#N/A	#N/A	TABUK UNIVERSITY, FAC BUSINESS ADM, ACCOUNTING DEPT, TABUK, SAUDI ARABIA; UNIVERSITY OF NOTTINGHAM, NOTTINGHAM UNIV BUSINESS SCH, DEPT ACCOUNTING, NOTTINGHAM, UNITED KINGDOM;	ACCOUNTING; BLOCKCHAIN; DIGITAL CURRENCY; CBDC; CRYPTOCURRENCY; DECENTRALISED TECHNOLOGY; TRIPLE-ENTRY ACCOUNTING	10.1016/j.ribaf.2023.101897	ARTICLE	BLOCKCHAIN; BITCOIN	RES INT BUS FINANC	RES. INT. BUS. FINANC.	ENGLISH	ELSEVIER	2023	ALSALMI, N; ULLAH, S (CORRESPONDING AUTHOR), UNIV NOTTINGHAM, NOTTINGHAM UNIV BUSINESS SCH, DEPT ACCOUNTING, NOTTINGHAM, ENGLAND.	0275-5319	RESEARCH IN INTERNATIONAL BUSINESS AND FINANCE	7	ACCOUNTING FOR DIGITAL CURRENCIES	64	ISI	UNIVERSITY OF TABUK; UNIVERSITY OF NOTTINGHAM	NOTREPORTED;UNIV NOTTINGHAM	#N/A	ALSALMI N, 2023, RES INT BUS FINANC	ALSALMI N, 2023, RES INT BUS FINANC
ALSAQA ZH, 2019, J INF TECHNOL MANAG	ALSAQA Z; HUSSEIN A; MAHMOOD S	ALSAQA ZEYAD HASHIM; HUSSEIN ALI IBRAHIM; MAHMOOD SADDAM MOHAMMED	none	THE OBJECTIVE OF THE RESEARCH IS TO CLARIFY WHAT BLOCKCHAIN TECHNIQUE IS AND THE DEVELOPMENTS OF ITS VARIOUS USES, AND IDENTIFY THE ACCOUNTING PERSPECTIVE OF THIS TECHNIQUE AND THE POSSIBILITY OF USING IT IN ACCOUNTING WORK. IT ALSO AIMS AT DEMONSTRATING HOW TO UTILIZE ITS BLOCKCHAIN TECHNIQUE IN ACCOUNTING INFORMATION SYSTEMS, AND IDENTIFY THE MOST IMPORTANT POTENTIAL EFFECTS OF THE USE OF TECHN…	#N/A	#N/A	UNIVERSITY OF MOSUL, DEPARTMENT OF ACCOUNTING, COLLEGE OF ADMINISTRATION AND ECONOMICS, IRAQ; TIKRIT UNIVERSITY, DEPARTMENT OF ACCOUNTING, COLLEGE OF ADMINISTRATION AND ECONOMICS, IRAQ;	ACCOUNTING INFORMATION SYSTEMS; BLOCKCHAIN; CRYPTOCURRENCY; TRIPLE- ENTRY ACCOUNTING	10.22059/jitm.2019.74301	ARTICLE	#N/A	J INF TECHNOL MANAG	J. INF. TECHNOL. MANAG.	ENGLISH	UNIVERSITY OF TEHRAN	2019	#N/A	20085893	JOURNAL OF INFORMATION TECHNOLOGY MANAGEMENT	18	THE IMPACT OF BLOCKCHAIN ON ACCOUNTING INFORMATION SYSTEMS	11	ISI	UNIVERSITY OF MOSUL;TIKRIT UNIVERSITY	UNIVERSITY OF MOSUL;TIKRIT UNIVERSITY	#N/A	ALSAQA ZH, 2019, J INF TECHNOL MANAG	ALSAQA ZH, 2019, J INF TECHNOL MANAG
ALTUKHOV PL, 2020, AEBMR ADV ECON	ALTUKHOV P; NOZHKINA E; DUSHEVINA E	ALTUKHOV, P. L.; NOZHKINA, E. B.; DUSHEVINA, E. M.	ALTUKHOV P, 2009, COLLECTION SCI WORKS, P100; ALTUKHOV P, 2008, B DONBASS STATE ENG, V2, P16; ALTUKHOV P, 2010, INTERUNIVERSITY COLL, P41; ALTUKHOV P, 2005, B EC SCI UKRAINE, V2, P3; ALTUKHOV P, 2004, MAT ALL RUSS SCI PRA, P3; ALTUKHOV P, 2008, MODERN PROBLEMS TEND, P21; ALTUKHOV P, 2005, SCI WORK DEGREE CAND, P87; ALTUKHOV P, 2005, INTEGRATION RUSSIA I, P40; ALTUKHOV P, 2000, MONOGRAPH; ALTUKHOV…	THE ARTICLE DEALS WITH THE APPLICATION OF THE PROCESS APPROACH TO THE CREATION OF INTELLECTUAL- INFORMATION MANAGEMENT SYSTEM FOR THE DEVELOPMENT OF INDUSTRIAL ENTERPRISES, IN ORDER TO IMPROVE THE EFFICIENCY AND ENSURE THE SPECIFIED PARAMETERS AND THE OVERALL PURPOSE OF ITS FUNCTIONING. THE IMPORTANCE OF STUDYING THE INFLUENCE OF ARTIFICIAL INTELLIGENCE ON THE DEVELOPMENT OF EXISTING INFORMATION …	SOLOVEV, DB	978-94-6252-929-8	FED STATE BUDGETARY EDUC INST HIGHER EDUC, SARATOV STATE LAW ACAD, DEPT ECON, VOLSKAYA ST,HOUSE 1, SARATOV 410056, RUSSIA;	ARTIFICIAL INTELLIGENCE; MANAGEMENT; ACCOUNTING; CRYPTOCURRENCY	#N/A	PROCEEDINGS PAPER	#N/A	AEBMR ADV ECON	#N/A	ENGLISH	ATLANTIS PRESS	2020	ALTUKHOV, PL (CORRESPONDING AUTHOR), FED STATE BUDGETARY EDUC INST HIGHER EDUC, SARATOV STATE LAW ACAD, DEPT ECON, VOLSKAYA ST,HOUSE 1, SARATOV 410056, RUSSIA.	2352-5428	PROCEEDINGS OF THE INTERNATIONAL SCIENTIFIC CONFERENCE - FAR EAST CON (ISCFEC 2020)	0	PROCESS APPROACH TO THE CREATION OF INTELLECTUALINFORMATION MANAGEMENT SYSTEM OF INDUSTRIAL ENTERPRISE DEVELOPMENT	128	ISI	FED STATE BUDGETARY EDUC INST HIGHER EDUC	FED STATE BUDGETARY EDUC INST HIGHER EDUC	#N/A	ALTUKHOV PL, 2020, AEBMR ADV ECON	ALTUKHOV PL, 2020, AEBMR ADV ECON
AL-WREIKAT A, 2023, INT J ELECTRON BUS	AL-WREIKAT A; ALMASARWAH A; AL-SHEYAB O	AL-WREIKAT ASSYAD; ALMASARWAH ADEL; AL-SHEYAB OLA	none	THIS STUDY INVESTIGATED THE ACCOUNTING TREATMENT OF BITCOIN, CONSIDERING WHETHER IT SHOULD BE CLASSIFIED AS AN ASSET OR A CURRENCY. THE STUDY ALSO EXPLORED THE ROLE OF BLOCKCHAIN TECHNOLOGY IN PROMOTING TRANSPARENCY AND THE POTENTIAL SEPARATION OF BLOCKCHAIN FROM BITCOIN. THE STUDY FOUND THAT CRYPTOCURRENCIES ARE SIGNIFICANTLY IMPACTED BY POLITICAL, ECONOMIC, AND REGULATORY FACTORS. THE STUDY ALS…	#N/A	#N/A	FROSTBURG STATE UNIVERSITY, ACCOUNTING DEPARTMENT, FROSTBURG, MD, USA; GEORGIA COLLEGE AND STATE UNIVERSITY, ACCOUNTING DEPARTMENT, COLLEGE OF BUSINESS AND LEADERSHIP, MILLEDGEVILLE, GA, USA; STEVENSON UNIVERSITY, BUSINESS DEPARTMENT, BROWN SCHOOL OF BUSINESS AND LEADERSHIP, BALTIMORE COUNTY, MD, USA;	ACCOUNTING; BITCOIN; BLOCKCHAIN; CRYPTOCURRENCY	10.1504/IJEB.2024.135657	ARTICLE	BITCOIN; ACCOUNTING APPROACH; ACCOUNTING INNOVATION; ACCOUNTING STANDARDS; BLOCK-CHAIN; BLOCKCHAIN TECHNOLOGY; CLASSIFIEDS; CROSS-BORDER; ECONOMIC FACTORS; POLITICAL FACTORS; REGULATORY FACTORS; BLOCKCHAIN	INT J ELECTRON BUS	INT. J. ELECTRON. BUS.	ENGLISH	INDERSCIENCE PUBLISHERS	2023	A. ALMASARWAH; ACCOUNTING DEPARTMENT, COLLEGE OF BUSINESS AND LEADERSHIP, GEORGIA COLLEGE AND STATE UNIVERSITY, MILLEDGEVILLE, UNITED STATES; EMAIL: ADEL.ALMASARWAH@GCSU.EDU	14706067	INTERNATIONAL JOURNAL OF ELECTRONIC BUSINESS	0	BLOCKCHAIN TECHNOLOGY CRYPTOCURRENCIES AND TRANSFORMING ACCOUNTING FEES	19	ISI	FROSTBURG STATE UNIVERSITY;GEORGIA COLLEGE AND STATE UNIVERSITY;STEVENSON UNIVERSITY	NOTREPORTED;GEORGIA COLLEGE AND STATE UNIVERSITY;NOTREPORTED	#N/A	AL-WREIKAT A, 2023, INT J ELECTRON BUS	AL-WREIKAT A, 2023, INT J ELECTRON BUS
AMMOUS S, 2018, Q REV ECON FINANC	AMMOUS S	AMMOUS, SAIFEDEAN	AMMOUS S, 2018, BANKING FINANCE LAW, V33; AMMOUS S, 2018, THE BITCOIN STANDARD: THE DECENTRALIZED ALTERNATIVE TO CENTRAL BANKING; ANONYMOUS, 2016, COINS NEWS C; COINDESK, 2014, BITC PIZZ DAY CEL PI; ETHEREUM ORG, 2016, WHAT IS ETH; GEORGE S, 2013, WORKING PAPER; GEORGE S, 2014, BITCOIN PROSPECTS PR; HAYEK F, 1978, DENATIONALISATION OF MONEY: THE ARGUMENT REFINED; LARIMER D, 2016, STEEM INCENTIVIZ…	THIS PAPER ANALYSES THE MONETARY CHARACTERISTICS OF FIVE CRYPTOCURRENCIES TO EVALUATE WHETHER THEY CAN PERFORM THE FUNCTIONS OF MONEY. WHILE ALL CRYPTOCURRENCIES CAN THEORETICALLY AND PRACTICALLY SERVE AS A MEDIUM OF EXCHANGE, THEY ARE UNLIKELY TO BECOME COMMON AND LIQUID MEDIA OF EXCHANGE UNLESS THEY CAN ILLUSTRATE UTILITY IN ONE OF THE OTHER FUNCTIONS OF MONEY. DIGITAL CURRENCIES' RIGIDLY INFLE…	#N/A	#N/A	LEBANESE AMERICAN UNIVERSITY, BEIRUT, LEBANON; COLUMBIA UNIVERSITY, CTR CAPITALISM & SOC, NEW YORK, NY 10027, USA;	BITCOIN; CRYPTOCURRENCY; DIGITAL CURRENCY; MONETARY SUPPLY; INNOVATION; VOLATILITY	10.1016/j.qref.2018.05.010	ARTICLE	#N/A	Q REV ECON FINANC	Q. REV. ECON. FINANC.	ENGLISH	ELSEVIER SCIENCE INC	2018	AMMOUS, S (CORRESPONDING AUTHOR), LEBANESE AMER UNIV, BEIRUT, LEBANON.; AMMOUS, S (CORRESPONDING AUTHOR), COLUMBIA UNIV, CTR CAPITALISM & SOC, NEW YORK, NY 10027 USA.	1062-9769	QUARTERLY REVIEW OF ECONOMICS AND FINANCE	61	CAN CRYPTOCURRENCIES FULFIL THE FUNCTIONS OF MONEY	70	ISI	LEBANESE AMERICAN UNIVERSITY; COLUMBIA UNIVERSITY	LEBANESE AMER UNIV;COLUMBIA UNIV	#N/A	AMMOUS S, 2018, Q REV ECON FINANC	AMMOUS S, 2018, Q REV ECON FINANC
ANGELINE YKH, 2021, ASIAN J BUS ACCOUNT	ANGELINE Y; CHIN W; TENK T; SALEH Z	ANGELINE, YAP KIEW HEONG; CHIN, WONG SIEW; TENK, TEOH TENG; SALEH, ZAKIAH	AKTER S, 2011, J AM SOC INF SCI TEC, V62, P100, DOI 10.1002/ASI.21442; ALAEDDIN O, 2018, INTERNATIONAL JOURNAL OF ENGINEERING TECHNOLOGY, V7, P8, DOI 10.14419/IJET.V7I4.29.21588; ALAM N, 2019, HALAL CRYPTOCURRENCY MANAGEMENT, P179, DOI 10.1007/978-3-030-10749-9_12, DOI 10.1007/978-3-030-10749-9_12; ALBRECHT C, 2019, J MONEY LAUND CONTRO, V22, P210, DOI 10.1108/JMLC-12-2017-0074; ANONYMOUS, 2018, …	MANUSCRIPT TYPE: RESEARCH PAPER RESEARCH AIMS: THIS STUDY EXAMINES THE INFLUENCES OF TECHNOLOGICAL FACTORS, RISKS AND REGULATORY FRAMEWORK ON THE ACCOUNTING TREATMENTS FOR CRYPTOCURRENCY IN MALAYSIA. DESIGN/METHODOLOGY/APPROACH: THIS STUDY EMPLOYS A STRUCTURED QUESTIONNAIRE TO SOLICIT DATA ABOUT THE ACCOUNTING TREATMENTS FOR CRYPTOCURRENCY. DATA WERE COLLECTED FROM 391 ACCOUNTING AND FINANCE PROF…	#N/A	#N/A	HELP UNIVERSITY, FAC BUSINESS ECON & ACCOUNTING, 15 JALAN SEMANTAN, KUALA LUMPUR 50490, MALAYSIA; UNIVERSITY MALAYA, FAC BUSINESS & ACCOUNTANCY, KUALA LUMPUR 50603, MALAYSIA;	DIGITAL CURRENCY; CRYPTOCURRENCY; ACCOUNTING; BLOCKCHAIN	10.22452/ajba.vol14no2.5	ARTICLE	FRAMEWORK	ASIAN J BUS ACCOUNT	ASIAN J. BUS. ACCOUNT.	ENGLISH	UNIV MALAYA, FAC BUSINESS & ACCOUNTANCY	2021	ANGELINE, YKH (CORRESPONDING AUTHOR), HELP UNIV, FAC BUSINESS ECON & ACCOUNTING, 15 JALAN SEMANTAN, KUALA LUMPUR 50490, MALAYSIA.	1985-4064	ASIAN JOURNAL OF BUSINESS AND ACCOUNTING	1	ACCOUNTING TREATMENTS FOR CRYPTOCURRENCIES IN MALAYSIA THE HIERARCHICAL COMPONENT MODEL APPROACH	14	ISI	HELP UNIVERSITY; UNIVERSITI MALAYA	HELP UNIV	#N/A	ANGELINE YKH, 2021, ASIAN J BUS ACCOUNT	ANGELINE YKH, 2021, ASIAN J BUS ACCOUNT
APPELBAUM D, 2020, J INF SYST	APPELBAUM D; NEHMER R	APPELBAUM, DENIZ; NEHMER, ROBERT A.	ALLES M, 2008, WORKING PAPER; AMERICAN INSTITUTE OF CERTIFIED PUBLIC ACCOUNTANTS (AICPA), 2006, AUD EV STAT AUD STAN; ANONYMOUS, 1991, AUDITING J PRACTICE; ANONYMOUS, 2012, ENTERPRISE RISK MANA; APPELBAUM D, 2017, J EMERG TECHNOL ACCO, V14, P99, DOI 10.2308/JETA-51704; APPELBAUM D, 2016, J EMERG TECHNOL ACCO, V13, P17, DOI 10.2308/JETA-51473; ARMBRUST M, 2010, COMMUN ACM, V53, P50, DOI 10.1145/17…	IN THIS RESEARCH, WE OFTEN REFER TO NAKAMOTO'S (2008) SEMINAL PAPER, ``BITCOIN: A PEER-TO-PEER ELECTRONIC CASH SYSTEM,'' TO CONSIDER HIS PROPOSED ABSTRACTED CHARACTERISTICS AND HOW AUDITORS COULD LOOK AT COMPANIES' TRANSACTIONS INTERFACING TO A PRIVATE/SEMI-PRIVATE BLOCKCHAIN WITH NAKAMOTO'S GENERAL CHARACTERISTICS AND ADDRESS THE RELATED AUDIT DOMAIN FOR SUCH TRANSACTIONS. WE THEN TAKE THESE DES…	#N/A	#N/A	MONTCLAIR STATE UNIVERSITY, FELICIANO SCH BUSINESS, DEPT ACCOUNTING & FINANCE, MONTCLAIR, NJ 07043, USA; OAKLAND UNIVERSITY, SCH BUSINESS ADM, DEPT ACCOUNTING & FINANCE, ROCHESTER, MI 48063, USA;	BLOCKCHAIN; AUDITING; DISTRIBUTED LEDGER TECHNOLOGY; CLOUD	10.2308/isys-52660	ARTICLE; PROCEEDINGS PAPER	DESIGN SCIENCE; BIG DATA; GOVERNANCE	J INF SYST	J. INF. SYST.	ENGLISH	AMER ACCOUNTING ASSOC	2020	APPELBAUM, D (CORRESPONDING AUTHOR), MONTCLAIR STATE UNIV, FELICIANO SCH BUSINESS, DEPT ACCOUNTING & FINANCE, MONTCLAIR, NJ 07043 USA.	0888-7985	JOURNAL OF INFORMATION SYSTEMS	31	AUDITING CLOUDBASED BLOCKCHAIN ACCOUNTING SYSTEMS	34	ISI	MONTCLAIR STATE UNIVERSITY; OAKLAND UNIVERSITY	MONTCLAIR STATE UNIV	#N/A	APPELBAUM D, 2020, J INF SYST	APPELBAUM D, 2020, J INF SYST
APPELBAUM D, 2022, J EMERG TECHNOL ACCO	APPELBAUM D; COHEN E; KINORY E; SMITH S	APPELBAUM, DENIZ; COHEN, ERIC COHEN; KINORY, ETHAN; SMITH, SEAN STEIN	ALBIZRI A, 2021, J INF SYST, V35, P1, DOI 10.2308/ISYS-19-024; ALLES M, 2008, AUDIT AUTOMATION FOR IMPLEMENTING CONTINUOUS AUDITING: PRINCIPLES AND PROBLEMS; AMERICAN INSTITUTE OF CERTIFIED PUBLIC ACCOUNTANTS AND THE CHARTERED PROFESSIONAL ACCOUNTANTS OF CANADA (AICPA AND CPA CANADA), 2017, BLOCKCHAIN TECHNOLOG; ANDROULAKI E, 2018, EUROSYS '18: PROCEEDINGS OF THE THIRTEENTH EUROSYS CONFERENCE, DO…	SATOSHI NAKAMOTO (2008) PUBLISHED A SEMINAL PAPER ON A PROMISING DIGITAL CURRENCY APPLICATION AND PROPOSED A DISTRIBUTED LEDGER TECHNOLOGY (DLT) TO SUPPORT IT. SHORTLY THEREAFTER, IN 2009, BITCOIN AND THE CUSTOMIZED DLT THAT SUPPORTS IT WERE ESTABLISHED. ALTHOUGH THE DLT DESCRIBED BY NAKAMOTO (2008), WHICH PACKAGES DATA INTO BLOCKS THAT ARE THEN CRYPTOGRAPHICALLY CHAINED TOGETHER (I.E., "BLOCK CH…	#N/A	#N/A	MONTCLAIR STATE UNIVERSITY, FELICIANO SCH BUSINESS, DEPT ACCOUNTING & FINANCE, MONTCLAIR, NJ 07043, USA; COHEN COMP CONSULTING, MECHANICSBURG, PA, USA; GEORGE MASON UNIVERSITY, SCH BUSINESS, DEPT ACCOUNTING, FAIRFAX, VA, USA; LEHMAN COLL CUNY, DEPT BUSINESS & ECON, BRONX, NY, USA;	BLOCKCHAIN; AUDITING; ACCOUNTING; INTERNAL CONTROL	10.2308/JETA-19-05-14-26	ARTICLE	#N/A	J EMERG TECHNOL ACCO	J. EMERG. TECHNOL. ACCOUNT.	ENGLISH	AMER ACCOUNTING ASSOC	2022	APPELBAUM, D (CORRESPONDING AUTHOR), MONTCLAIR STATE UNIV, FELICIANO SCH BUSINESS, DEPT ACCOUNTING & FINANCE, MONTCLAIR, NJ 07043 USA.	1554-1908	JOURNAL OF EMERGING TECHNOLOGIES IN ACCOUNTING	5	IMPEDIMENTS TO BLOCKCHAIN ADOPTION	19	ISI	MONTCLAIR STATE UNIVERSITY; GEORGE MASON UNIVERSITY; CITY UNIVERSITY OF NEW YORK (CUNY) SYSTEM; LEHMAN COLLEGE (CUNY)	MONTCLAIR STATE UNIV	#N/A	APPELBAUM D, 2022, J EMERG TECHNOL ACCO	APPELBAUM D, 2022, J EMERG TECHNOL ACCO
ATIK A, 2021, ISTANB BUS RES	ATIK A; KELTEN G	ATIK, ASUMAN; KELTEN, GOKSAL SELAHATDIN	ABDENNADHER S, 2022, J FINANC REPORT ACCO, V20, P53, DOI 10.1108/JFRA-05-2020-0151; ALDREDGE M, 2021, IND HIGHER EDUC, V35, P83, DOI 10.1177/0950422220954319; ALI O, 2020, INT J INFORM MANAGE, V54, DOI 10.1016/J.IJINFOMGT.2020.102199; ALLES M, 2020, INT J ACCOUNT INF SY, V38, DOI 10.1016/J.ACCINF.2020.100465; ANONYMOUS, 1915, ECON J, V25, P281; ANONYMOUS, 2015, VIRTUAL CURRENCY SCHEMES - A FURTHE…	WITH THE GROWTH OF THE BUSINESS WORLD, AUTONOMOUS SOFTWARE PROGRAMS SUCH AS MRP, ERP, AND SAP HAVE BEEN USED TO SYNCHRONIZE DIFFERENT UNITS AND DEPARTMENTS SINCE THE 1960S. THERE HAVE BEEN GREAT TECHNOLOGICAL DEVELOPMENTS IN THE LAST DECADES, SUCH AS BLOCKCHAIN, THE INTERNET OF THINGS, ARTIFICIAL INTELLIGENCE, AND MACHINE LEARNING. THE ATTENTION OF THE ACCOUNTING WORLD HAS ALSO BEEN ON THOSE TECH…	#N/A	#N/A	MARMARA UNIVERSITY, FAC BUSINESS ADM, DEPT ACCOUNTING & FINANCE, ISTANBUL, TURKEY; PAMUKKALE UNIVERSITY, FAC ECON & ADM SCI, DEPT ACCOUNTING & FINANCE, DENIZLI, TURKEY;	BLOCKCHAIN; CRYPTOCURRENCY; ACCOUNTING; AUDITING	10.26650/ibr.2021.50.806870	REVIEW	#N/A	ISTANB BUS RES	ISTANB. BUS. RES.	ENGLISH	ISTANBUL UNIV, SCH BUSINESS	2021	ATIK, A (CORRESPONDING AUTHOR), MARMARA UNIV, FAC BUSINESS ADM, DEPT ACCOUNTING & FINANCE, ISTANBUL, TURKEY.	#N/A	ISTANBUL BUSINESS RESEARCH	1	BLOCKCHAIN TECHNOLOGY AND ITS POTENTIAL EFFECTS ON ACCOUNTING A SYSTEMATIC LITERATURE REVIEW	50	ISI	MARMARA UNIVERSITY; PAMUKKALE UNIVERSITY	MARMARA UNIV	#N/A	ATIK A, 2021, ISTANB BUS RES	ATIK A, 2021, ISTANB BUS RES
BARROS F, 2023, MATH SOC SCI	BARROS F; BERTOLAI J; CARRIJO M	BARROS JR, FERNANDO; BERTOLAI, JEFFERSON; CARRIJO, MATHEUS	ANTONOPOULOS A, 2017, MASTERING BITCOIN: PROGRAMMING THE OPEN BLOCKCHAIN; BERENTSEN A, 2018, FED RESERVE BANK ST, V100, P97, DOI 10.20955/R.2018.97-106; BERTOLAI J, 2020, ANAL EC, V38; BIAIS B, 2019, REV FINANC STUD, V32, P1662, DOI 10.1093/RFS/HHY095; CARLSTEN M, 2016, CCS'16: PROCEEDINGS OF THE 2016 ACM SIGSAC CONFERENCE ON COMPUTER AND COMMUNICATIONS SECURITY, P154, DOI 10.1145/2976749.2978408…	THE FUNDAMENTAL MONETARY INNOVATION EMBEDDED INTO CRYPTOCURRENCIES IS ACCOUNTING COORDINATION. DECENTRALIZED MANAGEMENT OF DIGITAL MONEY'S ACCOUNTING BY A NETWORK OF COMPUTERS IS ACHIEVED AS A NASH EQUILIBRIUM OF A COORDINATION GAME AMONG THE NETWORK'S NODES: THE SO CALLED MINERS. EQUILIBRIUM ANALYSIS DEMANDS ALLOWING MINERS TO SECRETLY UPDATE THEIR ACCOUNTING, I.E., TO PRIVATELY BUILD MULTIPLE B…	#N/A	#N/A	UNIVERSITY OF SAO PAULO, FEARP, SAO PAULO, BRAZIL; UNIVERSITY OF SAO PAULO, LEMC FEARP, SAO PAULO, BRAZIL; UNIVERSITY OF SAO PAULO, DCM FFCLRP, SAO PAULO, BRAZIL; UNIVERSITY OF SAO PAULO, FAC ECON ADM & CONTABILIDADE RIBEIRAO PRETO, AVE BANDEIRANTES, 3900 VILA MONTE ALEGRE, BR-14040905 RIBEIRAO PRETO, SP, BRAZIL;	CRYPTOCURRENCY; ACCOUNTING; MANAGEMENT; COORDINATION GAME	10.1016/j.mathsocsci.2023.02.004	ARTICLE	#N/A	MATH SOC SCI	MATH. SOC. SCI.	ENGLISH	ELSEVIER	2023	BERTOLAI, J (CORRESPONDING AUTHOR), UNIV SAO PAULO, FAC ECON ADM & CONTABILIDADE RIBEIRAO PRETO, AVE BANDEIRANTES,3900 VILA MONTE ALEGRE, BR-14040905 RIBEIRAO PRETO, SP, BRAZIL.	0165-4896	MATHEMATICAL SOCIAL SCIENCES	0	CRYPTOCURRENCY IS ACCOUNTING COORDINATION SELFISH MINING AND DOUBLE SPENDING IN A SIMPLE MINING GAME	123	ISI	UNIVERSIDADE DE SAO PAULO; UNIVERSIDADE DE SAO PAULO; UNIVERSIDADE DE SAO PAULO; UNIVERSIDADE DE SAO PAULO	UNIV SAO PAULO	#N/A	BARROS F, 2023, MATH SOC SCI	BARROS F, 2023, MATH SOC SCI
BAUR DG, 2018, J INT FINANC MARK I	BAUR D; HONG K; LEE A	BAUR, DIRK G.; HONG, KIHOON; LEE, ADRIAN D.	ANONYMOUS, INFORM TECHNOLOGY MA; ANONYMOUS, 2008, BITCOIN PEER T UNPUB; ANONYMOUS, 2013, P 2013 C INT MEAS C; BAUR D, 2010, J BANK FINANC, V34, P1886, DOI 10.1016/J.JBANKFIN.2009.12.008; BERNHOLZ P, 1992, NEW PALGRAVE DICT MO, V2, P286; BRANDVOLD M, 2015, J INT FINANC MARK I, V36, P18, DOI 10.1016/J.INTFIN.2015.02.010; BRUNNERMEIER MK, 2009, REV FINANC STUD, V22, P2201, DOI 10.1093/RFS/HHN098; BU…	BITCOIN IS DEFINED AS DIGITAL MONEY WITHIN A DECENTRALIZED PEER-TO-PEER PAYMENT NETWORK. IT IS A HYBRID BETWEEN FIAT CURRENCY AND COMMODITY CURRENCY WITHOUT INTRINSIC VALUE AND INDEPENDENT OF ANY GOVERNMENT OR MONETARY AUTHORITY. THIS PAPER ANALYSES THE QUESTION OF WHETHER BITCOIN IS A MEDIUM OF EXCHANGE OR AN ASSET AND MORE SPECIFICALLY, WHAT IS ITS CURRENT USAGE AND WHAT USAGE WILL PREVAIL IN T…	#N/A	#N/A	UWA BUSINESS SCHOOL, 35 STIRLING HIGHWAY, CRAWLEY, WA 6009, AUSTRALIA; HONGIK UNIVERSITY, COLL BUSINESS, SEOUL, SOUTH KOREA; UNIVERSITY TECHNOLOGY SYDNEY, SYDNEY, NSW, AUSTRALIA;	BITCOIN; DIGITAL CURRENCY; ALTERNATIVE CURRENCY; MEDIUM OF EXCHANGE; ASSET CLASS; SAFE HAVEN	10.1016/j.intfin.2017.12.004	ARTICLE	CURRENCIES; ECONOMICS; MONEY	J INT FINANC MARK I	J. INT. FINANC. MARK. INST. MONEY	ENGLISH	ELSEVIER SCIENCE BV	2018	BAUR, DG (CORRESPONDING AUTHOR), UWA BUSINESS SCH, 35 STIRLING HIGHWAY, CRAWLEY, WA 6009, AUSTRALIA.	1042-4431	JOURNAL OF INTERNATIONAL FINANCIAL MARKETS INSTITUTIONS & MONEY	604	BITCOIN MEDIUM OF EXCHANGE OR SPECULATIVE ASSETS	54	ISI	UNIVERSITY OF WESTERN AUSTRALIA; HONGIK UNIVERSITY; UNIVERSITY OF TECHNOLOGY SYDNEY	UWA BUSINESS SCH	#N/A	BAUR DG, 2018, J INT FINANC MARK I	BAUR DG, 2018, J INT FINANC MARK I
BEIGMAN E, 2023, J ACCOUNT AUDIT FINA	BEIGMAN E; BRENNAN G; HSIEH S; SANNELLA A	BEIGMAN, EYAL; BRENNAN, GERARD; HSIEH, SHENG-FENG; SANNELLA, ALEXANDER J.	EUROPEAN CENTRAL BANK, 2019, CRYPTO ASSETS IMPLIC; FINANCIAL ACCOUNTING STANDARDS BOARD, 2011, FAIR VALUE MEASUREME; INTERNATIONAL ACCOUNTING STANDARDS BOARD, 2011, FAIR VAL MEAS; ROLL R, 1984, J FINANC, V39, P1127, DOI 10.2307/2327617	CRYPTOCURRENCIES AND BLOCKCHAIN TECHNOLOGY ARE DISRUPTIVE INNOVATIONS AT THE VANGUARD OF A NEW WAVE OF THE DIGITAL REVOLUTION. THE FAR-REACHING APPEAL, GLOBAL REACH, UNPRECEDENTED MOBILITY OF CAPITAL, AND MULTITUDE OF TRADING VENUES HAVE CREATED A MARKETPLACE LIKE NO OTHER. THE ECONOMIC FUNDAMENTALS UNDERLYING THIS MARKET ARE YET TO BE FULLY COMPREHENDED, AS EVIDENCED BY THE OFTEN-CONTRADICTING G…	#N/A	#N/A	LUKKA INC, NEW YORK, NY, USA; RUTGERS STATE UNIVERSITY, NEWARK, NJ, USA;	CRYPTOCURRENCY; FAIR VALUE MEASUREMENT; PRINCIPAL MARKET	10.1177/0148558X211004134	ARTICLE	#N/A	J ACCOUNT AUDIT FINA	J. ACCOUNT. AUDIT. FINANC.	ENGLISH	SAGE PUBLICATIONS INC	2023	SANNELLA, AJ (CORRESPONDING AUTHOR), RUTGERS STATE UNIV, RUTGERS BUSINESS SCH, ACCOUNTING & INFORMAT SYST, ONE WASHINGTON PK,ROOM 948, NEWARK, NJ 07102 USA.	0148-558X	JOURNAL OF ACCOUNTING AUDITING AND FINANCE	5	DYNAMIC PRINCIPAL MARKET DETERMINATION FAIR VALUE MEASUREMENT OF CRYPTOCURRENCY	38	ISI	RUTGERS UNIVERSITY SYSTEM; RUTGERS UNIVERSITY NEWARK; RUTGERS UNIVERSITY NEW BRUNSWICK	RUTGERS STATE UNIV	#N/A	BEIGMAN E, 2023, J ACCOUNT AUDIT FINA	BEIGMAN E, 2023, J ACCOUNT AUDIT FINA
BELLUCCI M, 2022, MEDITARI ACCOUNT RES	BELLUCCI M; BIANCHI D; MANETTI G	BELLUCCI, MARCO; BIANCHI, DAMIANO CESA; MANETTI, GIACOMO	ALFIERI E, 2019, J RISK FINANC, V20, P114, DOI 10.1108/JRF-03-2018-0035; ALLES M, 2020, INT J ACCOUNT INF SY, V38, DOI 10.1016/J.ACCINF.2020.100465; ARNABOLDI M, 2017, ACCOUNT AUDIT ACCOUN, V30, P762, DOI 10.1108/AAAJ-03-2017-2880; ASHLEY M, 2018, IEEE ENGINEERING MANAGEMENT REVIEW, V46, P100, DOI 10.1109/EMR.2018.2874967; AUSTIN A, 2021, J ACCOUNT PUBLIC POL, V40, DOI 10.1016/J.JACCPUBPOL.2021.1…	PURPOSE THIS STUDY AIMS TO REVIEW THE ACADEMIC LITERATURE ON THE UTILIZATION OF BLOCKCHAIN IN ACCOUNTING PRACTICE AND RESEARCH TO IDENTIFY POTENTIAL OPPORTUNITIES FOR FURTHER SCIENTIFIC INVESTIGATION AND TO PROVIDE A FRAMEWORK FOR HOW ACCOUNTING PRACTICES ARE IMPACTED BY BLOCKCHAIN. DESIGN/METHODOLOGY/APPROACH THIS STUDY IS BASED ON A SYSTEMATIC LITERATURE REVIEW (SLR) OF 346 RESEARCH PRODUCTS AV…	#N/A	#N/A	UNIVERSITY OF FLORENCE, DEPT ECON & MANAGEMENT, FLORENCE, ITALY; UNIVERSITY OF PISA, DEPT ECON & MANAGEMENT, PISA, ITALY;	BLOCKCHAIN; BIBLIOMETRIC; ACCOUNTING; AUDITING; CRYPTO ASSETS; TRIPLE-ENTRY ACCOUNTING; SMART CONTRACT	10.1108/MEDAR-10-2021-1477	REVIEW	ARTIFICIAL-INTELLIGENCE; SOCIAL MEDIA; SUPPLY CHAIN; BITCOIN; TECHNOLOGY; ACCOUNTABILITY; INFORMATION; CHALLENGES; BUSINESS; IMPACT	MEDITARI ACCOUNT RES	MEDITARI ACCOUNT. RES.	ENGLISH	EMERALD GROUP PUBLISHING LTD	2022	MANETTI, G (CORRESPONDING AUTHOR), UNIV FLORENCE, DEPT ECON & MANAGEMENT, FLORENCE, ITALY.	2049-372X	MEDITARI ACCOUNTANCY RESEARCH	20	BLOCKCHAIN IN ACCOUNTING PRACTICE AND RESEARCH SYSTEMATIC LITERATURE REVIEW	30	ISI	UNIVERSITY OF FLORENCE; UNIVERSITY OF PISA	UNIV FLORENCE	#N/A	BELLUCCI M, 2022, MEDITARI ACCOUNT RES	BELLUCCI M, 2022, MEDITARI ACCOUNT RES
BENNETT S, 2020, ACCOUNT PERSPECT	BENNETT S; CHARBONNEAU K; LEOPOLD R; MEZON L; PARADINE C; SCILIPOTI A; VILLMANN R	BENNETT, SHELDON; CHARBONNEAU, KEN; LEOPOLD, RYAN; MEZON, LINDA; PARADINE, CAROL; SCILIPOTI, ANTHONY; VILLMANN, REBECCA	ACSB (ACCOUNTING STANDARDS BOARD), SEARCH IFRS DISC GRO; ACSB (ACCOUNTING STANDARDS BOARD), DUE PROCESS; ANONYMOUS, IBM FOOD TRUST: A NEW ERA IN THE WORLD'S FOOD SUPPLY; BOAR C, 2020, 107 BIS; CANADIAN PUBLIC ACCOUNTABILITY BOARD (CPAB), 2019, AUD CRYPT ASS SECT I; CHAMBER OF DIGITAL COMMERCE CANADA BLOCKCHAIN RESEARCH INSTITUTE AND ACCENTURE, 2019, CAN BLOCKCH CENS 1;CHARTERED PROFESSIONAL ACCOU…	BLOCKCHAIN AND CRYPTOASSETS ARE TRANSFORMING HOW BUSINESS IS CONDUCTED. LEADERS FROM CANADIAN PRACTICE PROVIDE INSIGHTS ON HOW CONSULTANTS, STANDARD SETTERS, AUDITORS, AND REGULATORS HAVE BEEN GETTING INVOLVED TO SUPPORT BUSINESS AND WORK THROUGH THE CHALLENGES TO RAISE FUNDS, REPORT TO INVESTORS, AND PROTECT THE PUBLIC INTEREST IN A BLOCKCHAIN-ENABLED WORLD. THESE LEADERS SHARE THE CHALLENGES AN…	#N/A	#N/A	DMG BLOCKCHAIN SOLUT INC, VANCOUVER, BC, CANADA; AUDITING & ASSURANCE STAND BOARD, OTTAWA, ON, CANADA; PWC, LONDON, UNITED KINGDOM; ACCOUNTING STAND BOARD, OTTAWA, ON, CANADA; CANADIAN PUBL ACCOUNTABILITY BOARD, TORONTO, ON, CANADA VERITAS INVESTMENT RES, TORONTO, ON, CANADA; FINANCIAL REPORTING & ASSURANCE STAND CANADA, TORONTO, ON, CANADA;	ACCOUNTING; AUDITING; BLOCKCHAIN; CRYPTO ASSETS; CRYPTOCURRENCY	10.1111/1911-3838.12238	ARTICLE	#N/A	ACCOUNT PERSPECT	ACCOUNT. PERSPECT.	ENGLISH	WILEY	2020	VILLMANN, R (CORRESPONDING AUTHOR), FINANCIAL REPORTING & ASSURANCE STAND CANADA, TORONTO, ON, CANADA.	1911-382X	ACCOUNTING PERSPECTIVES	3	BLOCKCHAIN AND CRYPTOASSETS INSIGHTS FROM PRACTICE	19	ISI	VERITAS INVESTMENT RES	R (CORRESPONDING AUTHOR)	#N/A	BENNETT S, 2020, ACCOUNT PERSPECT	BENNETT S, 2020, ACCOUNT PERSPECT
BLAHUSIAKOVA M, 2022, CONTEMP ECON	BLAHUSIAKOVA M	BLAHUSIAKOVA, MIRIAMA	ABRAHAM M, 2020, J CORP ACCOUNT FINAN, V31, P98, DOI 10.1002/JCAF.22427; ACCA GLOBAL, 2019, ACC CRYPT; ALBRECHT C, 2020, LEDGER-PITTSBURGH, V5, DOI 10.5195/LEDGER.2020.167, DOI 10.5195/LEDGER.2020.167; BERENGUERES J, 2018, LEDGER-PITTSBURGH, V3, P60, DOI 10.5195/LEDGER.2018.123; BURNIE A, 2018, LEDGER-PITTSBURGH, V3, P24, DOI 10.5195/LEDGER.2018.121; BYSTRÖM H, 2019, LEDGER-PITTSBURGH, V4, P40, D…	CRYPTOCURRENCY HAS ATTRACTED MORE ATTENTION RECENTLY. WITH THE RAPID INCREASE IN POPULARITY OF CRYPTOCURRENCIES ' TRANSACTIONS IT IS NECESSARY TO ADOPT A UNIFIED APPROACH TO THIS NOVEL, 21ST CENTURY PHENOMENON. SINCE 2009, WHEN THE FIRST CRYPTOCURRENCY BITCOIN WAS CREATED, THOUSANDS OF OTHER CRYPTOCURRENCIES HAVE APPEARED. AS THE TRANSACTIONS WITH CRYPTOCURRENCIES HAVE INCREASED, NATIONAL AND MUL…	#N/A	#N/A	UNIVERSITY OF ECONOMY BRATISLAVA, FAC ECON INFORMAT, DEPT ACCOUNTING & AUDITING, DOLNOZEMSKA CESTA 1, BRATISLAVA 85235, SLOVAKIA;	CRYPTOCURRENCY; VIRTUAL CURRENCY; ACCOUNTING; IFRS; INTANGIBLE ASSET; INVENTORIES	10.5709/ce.1897-9254.466	ARTICLE	#N/A	CONTEMP ECON	CONTEMP. ECON.	ENGLISH	UNIV ECONOMICS & HUMAN SCIENCES WARSAW	2022	BLAHUSIAKOVA, M (CORRESPONDING AUTHOR), UNIV ECON BRATISLAVA, FAC ECON INFORMAT, DEPT ACCOUNTING & AUDITING, DOLNOZEMSKA CESTA 1, BRATISLAVA 85235, SLOVAKIA.	2084-0845	CONTEMPORARY ECONOMICS	5	ACCOUNTING FOR HOLDINGS OF CRYPTOCURRENCIES IN THE SLOVAK REPUBLIC COMPARATIVE ANALYSIS	16	ISI	UNIVERSITY OF ECONOMICS BRATISLAVA	UNIV ECON BRATISLAVA	#N/A	BLAHUSIAKOVA M, 2022, CONTEMP ECON	BLAHUSIAKOVA M, 2022, CONTEMP ECON
BÖHME R, 2015, J ECON PERSPECT	BÖHME R; CHRISTIN N; EDELMAN B; MOORE T	BOEHME, RAINER; CHRISTIN, NICOLAS; EDELMAN, BENJAMIN; MOORE, TYLER	ABRAMS R, 2014, NY TIMES; ANDERSON R, 2012, J BANK FINANC, P99; ANDREESSEN M., 2014, NEW YORK TIMES, P21; ANDROULAKI E, 2013, REVISED SELECTED PAPERS, P34, DOI DOI 10.1007/978-3-642-39884-1, 10.1007/978-3-642-39884-1_4, DOI 10.1007/978-3-642-39884-1_4; ANDRYCHOWICZ M, 2014, P 35 IEEE S SEC PRIV; ANONYMOUS, 2014, WALL STREET J; ANONYMOUS, NUCL POW WORLD TOD; ANONYMOUS, TECHNICAL REPORT; ANONYMOUS,…	BITCOIN IS AN ONLINE COMMUNICATION PROTOCOL THAT FACILITATES THE USE OF A VIRTUAL CURRENCY, INCLUDING ELECTRONIC PAYMENTS. BITCOIN'S RULES WERE DESIGNED BY ENGINEERS WITH NO APPARENT INFLUENCE FROM LAWYERS OR REGULATORS. BITCOIN IS BUILT ON A TRANSACTION LOG THAT IS DISTRIBUTED ACROSS A NETWORK OF PARTICIPATING COMPUTERS. IT INCLUDES MECHANISMS TO REWARD HONEST PARTICIPATION, TO BOOTSTRAP ACCEPTA…	#N/A	#N/A	UNIVERSITY OF INNSBRUCK, SECUR & PRIVACY, A-6020 INNSBRUCK, AUSTRIA; CARNEGIE MELLON UNIVERSITY, DEPT ELECT & COMP ENGN, PITTSBURGH, PA 15213, USA; CARNEGIE MELLON UNIVERSITY, CYLAB, PITTSBURGH, PA 15213, USA; HARVARD UNIVERSITY, SCH BUSINESS, BUSINESS ADM, BOSTON, MA 02163, USA; SO METHODIST UNIVERSITY, COMP SCI & ENGN, DALLAS, TX 75275, USA;	BITCOIN; ECONOMICS; TECHNOLOGY; GOVERNANCE	10.1257/jep.29.2.213	ARTICLE	#N/A	J ECON PERSPECT	J. ECON. PERSPECT.	ENGLISH	AMER ECONOMIC ASSOC	2015	BÖHME, R (CORRESPONDING AUTHOR), UNIV INNSBRUCK, SECUR & PRIVACY, A-6020 INNSBRUCK, AUSTRIA.	0895-3309	JOURNAL OF ECONOMIC PERSPECTIVES	696	BITCOIN ECONOMICS TECHNOLOGY AND GOVERNANCE	29	ISI	UNIVERSITY OF INNSBRUCK; CARNEGIE MELLON UNIVERSITY; CARNEGIE MELLON UNIVERSITY; HARVARD UNIVERSITY; SOUTHERN METHODIST UNIVERSITY	UNIV INNSBRUCK	#N/A	BÖHME R, 2015, J ECON PERSPECT	BÖHME R, 2015, J ECON PERSPECT
BONDARENKO O, 2019, BALT J ECON STUD	BONDARENKO O; KICHUK O; ANTONOV A	BONDARENKO, OLENA; KICHUK, OKSANA; ANTONOV, ANDRII	AMARNATH D, 2018, INT J EC MANAGEMENT, V5, P25, DOI 10.14445/23939125/IJEMS-V5I1P105, DOI 10.14445/23939125/IJEMS-V5I1P105; DUCHENKO M, 2018, EFEKTYVNA EKONOMIKA, DOI 10.32702/2307-2105-2018.12.109, DOI 10.32702/2307-2105-2018.12.109; HIGBEE A, 2018, COMPUT FRAUD SECUR, P13, DOI 10.1016/S1361-3723(18)30064-2; IBRAHIM M, 2018, SSRN ELECT J, DOI 10.2139/SSRN.3144187, DOI 10.2139/SSRN.3144187; KOVAL…	THE INTERNATIONAL EXPERIENCE OF VARIOUS COUNTRIES OF THE WORLD IN THE IMPLEMENTATION, USAGE, AND ECONOMIC AND LEGAL STATUS OF CRYPTOCURRENCY IS COMPARED IN THIS RESEARCH. THE ADVANTAGES AND DISADVANTAGES OF USING CRYPTOCURRENCY AT THE PRESENT STAGE OF ECONOMIC AND SCIENTIFIC-TECHNICAL DEVELOPMENT OF UKRAINE ARE CONSIDERED. THE RESULTS OF THE RESEARCH OF THE AWARENESS OF MARKET PARTICIPANTS REGARD…	#N/A	#N/A	OS POPOV ODESA NATL ACAD TELECOMMUN, ODESSA, UKRAINE; ODESSA NATL ECON UNIV, ODESSA, UKRAINE; ZHYTOMYR STATE TECHNOL UNIV, ZHYTOMYR, UKRAINE;	CRYPTOCURRENCY; BITCOIN; DIGITAL MONEY	10.30525/2256-0742/2019-5-2-10-17	ARTICLE	CRYPTO-CURRENCY	BALT J ECON STUD	BALT. J. ECON. STUD.	ENGLISH	BALTIC JOURNAL ECONOMIC STUDIES	2019	BONDARENKO, O (CORRESPONDING AUTHOR), OS POPOV ODESA NATL ACAD TELECOMMUN, ODESSA, UKRAINE.	2256-0742	BALTIC JOURNAL OF ECONOMIC STUDIES	6	THE POSSIBILITIES OF USING INVESTMENT TOOLS BASED ON CRYPTOCURRENCY IN THE DEVELOPMENT OF THE NATIONAL ECONOMY	5	ISI	MINISTRY OF EDUCATION AND SCIENCE OF UKRAINE; ODESSA NATIONAL ECONOMIC UNIVERSITY; MINISTRY OF EDUCATION AND SCIENCE OF UKRAINE; ZHYTOMYR POLYTECHNIC STATE UNIVERSITY	OS POPOV ODESA NATL ACAD TELECOMMUN	#N/A	BONDARENKO O, 2019, BALT J ECON STUD	BONDARENKO O, 2019, BALT J ECON STUD
BONYUET D, 2020, INT J DIGIT ACCOUNT RES	BONYUET D	BONYUET DERRICK	none	BLOCKCHAIN HAS BECOME VERY POPULAR AS THE UNDERLYING TECHNOLOGY POWERING BITCOIN. HOWEVER, THE BENEFITS BEHIND THIS TECHNOLOGY FURTHER SURPASS JUST SUPPORTING CRYPTOCURRENCIES. BLOCKCHAIN CAN BE DEFINED AS A DIGITAL LEDGER THAT ALLOWS TO CAPTURE TRANSACTIONS CONDUCTED AMONG SEVERAL PARTIES ON REAL-TIME AND SERVES AS A DECENTRALIZED DATABASE WHERE EACH PARTICIPANT KEEPS AN IDENTICAL COPY OF THE LE…	#N/A	#N/A	OKLAHOMA STATE UNIVERSITY, USA;	ACCOUNTING; AUDITING; BLOCKCHAIN; SMART CONTRACT	10.4192/1577-8517-v20_2	ARTICLE	#N/A	INT J DIGIT ACCOUNT RES	INT. J. DIGIT. ACCOUNT. RES.	ENGLISH	UNIVERSIDAD DE HUELVA	2020	D. BONYUET; OKLAHOMA STATE UNIVERSITY, UNITED STATES; EMAIL: DERRICK.BONYUET@OKSTATE.EDU	15778517	INTERNATIONAL JOURNAL OF DIGITAL ACCOUNTING RESEARCH	48	OVERVIEW AND IMPACT OF BLOCKCHAIN ON AUDITING	20	ISI	OKLAHOMA STATE UNIVERSITY	NOTREPORTED;OKLAHOMA STATE UNIVERSITY;NOTREPORTED	#N/A	BONYUET D, 2020, INT J DIGIT ACCOUNT RES	BONYUET D, 2020, INT J DIGIT ACCOUNT RES
BORRI N, 2019, J EMPIR FINANC	BORRI N	BORRI, NICOLA	ACHARYA V, 2012, AM ECON REV, V102, P59, DOI 10.1257/AER.102.3.59; ACHARYA V, 2017, REV FINANC STUD, V30, P2, DOI 10.1093/RFS/HHW088; ADRIAN T, 2016, AM ECON REV, V106, P1705, DOI 10.1257/AER.20120555; ANONYMOUS, J ALTERN INVEST; ANONYMOUS, 1986, SIMPLE POSITIVE SEMI; ARDIA D, 2018, REGIME CHANGES UNPUB; BIAIS B, 2018, BLOCKCHAIN FOL UNPUB; BILLIO M, 2012, J FINANC ECON, V104, P535, DOI 10.1016/J…	IN THIS PAPER WE USE COVAR TO ESTIMATE THE CONDITIONAL TAIL-RISK IN THE MARKETS FOR BITCOIN, ETHER, RIPPLE AND LITECOIN AND FIND THAT THESE CRYPTOCURRENCIES ARE HIGHLY EXPOSED TO TAIL-RISK WITHIN CRYPTOMARKETS, WHILE THEY ARE NOT EXPOSED TO TAIL-RISK WITH RESPECT TO OTHER GLOBAL ASSETS, LIKE THE U.S. EQUITY MARKET OR GOLD. ALTHOUGH CRYPTOCURRENCY RETURNS ARE, HIGHLY CORRELATED ONE WITH THE OTHER,…	#N/A	#N/A	LUISS UNIVERSITY, DEPT ECON & FINANCE, VIALE ROMANIA 32, I-00197 ROME, ITALY;	CRYPTOCURRENCY; CONTAGION; COVAR; TAIL-RISK	10.1016/j.jempfin.2018.11.002	ARTICLE	SYSTEMIC RISK; BITCOIN	J EMPIR FINANC	J. EMPIR. FINANC.	ENGLISH	ELSEVIER SCIENCE BV	2019	BORRI, N (CORRESPONDING AUTHOR), LUISS UNIV, DEPT ECON & FINANCE, VIALE ROMANIA 32, I-00197 ROME, ITALY.	0927-5398	JOURNAL OF EMPIRICAL FINANCE	168	CONDITIONAL TAILRISK IN CRYPTOCURRENCY MARKETS	50	ISI	LUISS GUIDO CARLI UNIVERSITY	LUISS UNIV	#N/A	BORRI N, 2019, J EMPIR FINANC	BORRI N, 2019, J EMPIR FINANC
BORRI N, 2022, REV ASSET PRICING ST	BORRI N; SHAKHNOV K	BORRI, NICOLA; SHAKHNOV, KIRILL	ABDI F, 2017, REV FINANC STUD, V30, P4437, DOI 10.1093/RFS/HHX084; AMIHUD Y, 2002, J FINANC MARK, V5, P31, DOI 10.1016/S1386-4181(01)00024-6; ANDREWS D, 1991, ECONOMETRICA, V59, P817, DOI 10.2307/2938229; BABA C, 2011, EFFECTIVENESS CAPITA; BARBERIS N, 1998, J FINANC ECON, V49, P307, DOI 10.1016/S0304-405X(98)00027-0; BIAIS B, 2019, REV FINANC STUD, V32, P1662, DOI 10.1093/RFS/HHY095; BITWISE, 20…	AT A GIVEN POINT IN TIME, BITCOIN PRICES ARE DIFFERENT ON EXCHANGES LOCATED IN DIFFERENT COUNTRIES, OR AGAINST DIFFERENT CURRENCIES. WHILE EXISTING LITERATURE ATTRIBUTES THE LARGEST PRICE DIFFERENCES TO FRICTIONS, LIKE MARKET SEGMENTATION, TRADING PLATFORMS ADVERTIZE HOW TO EXECUTE TRADES BASED ON THIS INFORMATION. WE PROVIDE A NOVEL RISK-BASED EXPLANATION OF THESE PRICE DIFFERENCES FOR A SAMPLE …	#N/A	#N/A	LUISS UNIVERSITY, ROME, ITALY; UNIVERSITY SURREY, SCH ECON, GUILDFORD, SURREY, UNITED KINGDOM;	BITCOIN; CRYPTOCURRENCY; REVENUE	10.1093/rapstu/raac007	ARTICLE	FOREIGN-CURRENCY RISK; BITCOIN; PREMIA; HETEROSKEDASTICITY; ARBITRAGE; LIQUIDITY; SENTIMENT; COSTS	REV ASSET PRICING ST	REV. ASSET PRICING STUD.	ENGLISH	OXFORD UNIV PRESS	2022	BORRI, N (CORRESPONDING AUTHOR), LUISS UNIV, ROME, ITALY.	2045-9920	REVIEW OF ASSET PRICING STUDIES	15	THE CROSSSECTION OF CRYPTOCURRENCY RETURNS	12	ISI	LUISS GUIDO CARLI UNIVERSITY; UNIVERSITY OF SURREY	LUISS UNIV	#N/A	BORRI N, 2022, REV ASSET PRICING ST	BORRI N, 2022, REV ASSET PRICING ST
BOURI E, 2017, APPL ECON	BOURI E; JALKH N; MOLNÁR P; ROUBAUD D	BOURI, ELIE; JALKH, NAJI; MOLNAR, PETER; ROUBAUD, DAVID	ANONYMOUS, 2015, WORKING PAPER; BAUR D, 2015, SSRN ELECTRONIC JOURNAL, P1, DOI DOI 10.2139/SSRN.2561183; BAUR D, 2010, FINAN REV, V45, P217, DOI 10.1111/J.1540-6288.2010.00244.X; BOURI E, 2017, FINANC RES LETT, V20, P192, DOI 10.1016/J.FRI.2016.09.025; BRANDVOLD M, 2015, J INT FINANC MARK I, V36, P18, DOI 10.1016/J.INTFIN.2015.02.010; CAPPIELLO L, 2006, J FINANCIAL ECONOMET, V4, P537, DOI 10.1093…	WE STUDY THE RELATIONSHIP BETWEEN BITCOIN AND COMMODITIES BY ASSESSING THE ABILITY OF BITCOIN TO ACT AS A DIVERSIFIER, HEDGE, OR SAFE HAVEN AGAINST DAILY MOVEMENTS IN COMMODITIES IN GENERAL, AND ENERGY COMMODITIES IN PARTICULAR. WE FOCUS ON ENERGY COMMODITIES BECAUSE ENERGY, IN THE FORM OF ELECTRICITY, IS AN ESSENTIAL INPUT IN THE BITCOIN PRODUCTION. FOR THE ENTIRE PERIOD, RESULTS SHOW THAT BITCO…	#N/A	#N/A	HOLY SPIRIT UNIV KASLIK, USEK BUSINESS SCH, JOUNIEH, LEBANON; ST JOSEPH UNIV, FAC BUSINESS & MANAGEMENT, BEIRUT, LEBANON; UNIV STAVANGER, UIS BUSINESS SCH, STAVANGER, NORWAY; MONTPELLIER BUSINESS SCH, MONTPELLIER RES MANAGEMENT, MONTPELLIER, FRANCE;	CRYPTOCURRENCY; BITCOIN; COMMODITIES; ENERGY COMMODITIES; DIVERSIFIER; HEDGING; SAFE HAVEN	10.1080/00036846.2017.1299102	ARTICLE	ECONOMICS	APPL ECON	APPL. ECON.	ENGLISH	ROUTLEDGE JOURNALS, TAYLOR & FRANCIS LTD	2017	ROUBAUD, D (CORRESPONDING AUTHOR), MONTPELLIER BUSINESS SCH, MONTPELLIER RES MANAGEMENT, MONTPELLIER, FRANCE.	0003-6846	APPLIED ECONOMICS	216	BITCOIN FOR ENERGY COMMODITIES BEFORE AND AFTER THE DECEMBER 2013 CRASH DIVERSIFIER HEDGE OR SAFE HAVEN	49	ISI	UNIVERSITETET I STAVANGER; UNIVERSITE DE MONTPELLIER; MONTPELLIER BUSINESS SCHOOL	MONTPELLIER BUSINESS SCH	#N/A	BOURI E, 2017, APPL ECON	BOURI E, 2017, APPL ECON
BOURVEAU T, 2022, J ACCOUNT RES	BOURVEAU T; DE G E; ELLAHIE A; MACCIOCCHI D	BOURVEAU, THOMAS; DE GEORGE, EMMANUEL T.; ELLAHIE, ATIF; MACCIOCCHI, DANIELE	ADHAMI S, 2018, J ECON BUS, V100, P64, DOI 10.1016/J.JECONBUS.2018.04.001; ADMATI A, 1990, ECONOMETRICA, V58, P901, DOI 10.2307/2938355; AKERLOF G, 1970, Q J ECON, V84, P488, DOI 10.2307/1879431; AMSDEN R, 2019, ARE BLOCKCHAIN CROWDSALES THE NEW "GOLD RUSH"? SUCCESS DETERMINANTS OF INITIAL COIN OFFERINGS; ANONYMOUS, 1951, SECURITIES REGULATIO; BALAKRISHNAN K, 2014, J FINANC, V69, P2237, DOI 10.11…	USING AN INTERNATIONAL SAMPLE OF 2,113 INITIAL COIN OFFERINGS (ICOS), WE EXPLORE THE ROLE OF DISCLOSURE AND INFORMATION INTERMEDIARIES IN THE UNREGULATED CRYPTO-TOKENS MARKET. FIRST, WE DOCUMENT SUBSTANTIAL CROSS-SECTIONAL VARIATION IN THE VOLUNTARY DISCLOSURE PRACTICES OF VENTURES SEEKING TO RAISE CAPITAL THROUGH ICOS, SUCH AS THE EXTENT OF INFORMATION RELEASED IN A PROSPECTUS-TYPE DOCUMENT CALL…	#N/A	#N/A	COLUMBIA UNIVERSITY, NEW YORK, NY 10027, USA; UNIVERSITY OF MIAMI, CORAL GABLES, FL 33124, USA; UNIVERSITY OF UTAH, SALT LAKE CITY, UT 84112, USA;	INITIAL COIN OFFERING; TOKENS; DISCLOSURE; INFORMATION INTERMEDIARIES; RATINGS; UNREGULATED CAPITAL MARKETS	10.1111/1475-679X.12404	ARTICLE	VOLUNTARY DISCLOSURE; ECONOMIC CONSEQUENCES; PRIVATE MEETINGS; CREDIBILITY; LIQUIDITY; PROCEEDS; LEMONS; COSTS; FIRM	J ACCOUNT RES	J. ACCOUNT. RES.	ENGLISH	WILEY	2022	BOURVEAU, T (CORRESPONDING AUTHOR), COLUMBIA UNIV, NEW YORK, NY 10027 USA.	0021-8456	JOURNAL OF ACCOUNTING RESEARCH	30	THE ROLE OF DISCLOSURE AND INFORMATION INTERMEDIARIES IN AN UNREGULATED CAPITAL MARKET EVIDENCE FROM INITIAL COIN OFFERINGS	60	ISI	COLUMBIA UNIVERSITY; UNIVERSITY OF MIAMI; UTAH SYSTEM OF HIGHER EDUCATION; UNIVERSITY OF UTAH	COLUMBIA UNIV	#N/A	BOURVEAU T, 2022, J ACCOUNT RES	BOURVEAU T, 2022, J ACCOUNT RES
BOZDOĞANOĞLU B, 2022, CURR ISSUES AND EMPIR STUD IN PUBLIC FINANCE	BOZDOĞANOĞLU B	BOZDOĞANOĞLU BURÇIN	none	THE PROCESS OF DIGITALIZATION AND THE INTENSIVE USE OF THE INTERNET IS CHANGING THE NATURE OF PRODUCTS AND SERVICES, HOW THESE PRODUCTS ARE PRODUCED, AND HOW PRODUCTS AND SERVICES ARE MARKETED AND SOLD. THIS EASY ACCESS TO DIGITAL PRODUCTS AND SERVICES GIVES TAXPAYERS ACCESS TO NEW REVENUE STREAMS THROUGH VIRTUAL TRANSACTIONS. THESE TRANSACTIONS CAN BE SETTLED IN THE FORM OF "REAL MONEY" OR CURRE…	#N/A	978-363188236-8; 978-363188167-5	BANDIRMA ONYEDI EYLÜL UNIVERSITY, DEPARTMENT OF PUBLIC FINANCE, TURKEY;	CRYPTO ASSETS; DIGITAL FINANCIAL LITERACY; TAXATION; TECHNOLOGY LITERACY	#N/A	BOOK CHAPTER	#N/A	CURR ISSUES AND EMPIR STUD IN PUBLIC FINANCE	CURR. ISSUES AND EMPIR. STUD. IN PUBLIC FINANCE	ENGLISH	PETER LANG AG	2022	B. BOZDOĞANOĞLU; BANDIRMA ONYEDI EYLÜL UNIVERSITY, DEPARTMENT OF PUBLIC FINANCE, TURKEY; EMAIL: BURCINDOGAN@GMAIL.COM	#N/A	CURRENT ISSUES AND EMPIRICAL STUDIES IN PUBLIC FINANCE	0	EVALUATION OF THE EFFECTS OF TECHNOLOGY LITERACY AND DIGITAL FINANCIAL LITERACY ON THE INVESTMENT AND TAXATION PROCESS IN CRYPTO ASSETS	#N/A	ISI	BANDIRMA ONYEDI EYLÜL UNIVERSITY	NOTREPORTED;BANDIRMA ONYEDI EYLÜL UNIVERSITY;NOTREPORTED	#N/A	BOZDOĞANOĞLU B, 2022, CURR ISSUES AND EMPIR STUD IN PUBLIC FINANCE	BOZDOĞANOĞLU B, 2022, CURR ISSUES AND EMPIR STUD IN PUBLIC FINANCE
BUHUSSAIN G, 2023, CONTRIB MANAG SCI	BUHUSSAIN G; HAMDAN A	BUHUSSAIN GHADEER; HAMDAN ALLAM	none	THE TECHNOLOGY KNOWN AS BLOCKCHAIN HAS GAINED SIGNIFICANT TRACTION AS THE FOUNDATIONAL INFRASTRUCTURE SUPPORTING THE DIGITAL CURRENCY KNOWN AS BITCOIN. NEVERTHELESS, THE ADVANTAGES OF THIS TECHNOLOGY EXTEND BEYOND ITS ROLE IN FACILITATING CRYPTOCURRENCIES. BLOCKCHAIN IS A DIGITAL LEDGER THAT ENABLES THE RECORDING OF TRANSACTIONS BETWEEN MULTIPLE PARTIES IN REAL TIME. IT FUNCTIONS AS A DECENTRALIZ…	#N/A	#N/A	AHLIA UNIVERSITY, MANAMA, BAHRAIN;	ACCOUNTING; AUDITING; BLOCKCHAIN; DIGITAL TECHNOLOGIES; INNOVATION; SMART CONTRACT	10.1007/978-981-99-6101-6_52	BOOK CHAPTER	#N/A	CONTRIB MANAG SCI	CONTRIB. MANAG. SCI.	ENGLISH	SPRINGER SCIENCE AND BUSINESS MEDIA DEUTSCHLAND GMBH	2023	#N/A	14311941	CONTRIBUTIONS TO MANAGEMENT SCIENCE	0	BLOCKCHAIN TECHNOLOGY AND AUDIT PROFESSION	PART F1640	ISI	AHLIA UNIVERSITY	AHLIA UNIVERSITY	#N/A	BUHUSSAIN G, 2023, CONTRIB MANAG SCI	BUHUSSAIN G, 2023, CONTRIB MANAG SCI
CALISKAN K, 2020, ECON SOC	CALISKAN K	CALISKAN, KORAY	ANAND N, 2012, ETHNOGRAPHY, V13, P487, DOI 10.1177/1466138111435743; ANONYMOUS, 2018, THE GUARDIAN; APPEL H, 2012, AM ETHNOL, V39, P692, DOI 10.1111/J.1548-1425.2012.01389.X; BARRY A, 2013, MATERIAL POLITICS: DISPUTES ALONG THE PIPELINE; BJERG O, 2016, THEOR CULT SOC, V33, P53, DOI 10.1177/0263276415619015; BRUNTON F, 2019, DIGITAL CASH: THE UNKNOWN HISTORY OF THE ANARCHISTS, UTOPIANS, AND TECHNO…	DRAWING ON AN EMPIRICAL STUDY OF CRYPTOCURRENCY WHITE PAPERS, THIS PAPER PROPOSES AN ACTOR-BASED TAXONOMY OF CRYPTOCURRENCY BLOCKCHAINS. FIRST, IT DESCRIBES THE EVOLUTION OF BLOCKCHAIN ARCHITECTURE WITH REFERENCE TO THE ECONOMIC SERVICES THAT BLOCKCHAINS SUPPLY. SECOND, IT DISCUSSES THE SOCIO-TECHNICAL PLATFORM OF BLOCKCHAINS AS PROPOSED IN CRYPTOCURRENCY WHITE PAPERS. THIRD, IT ANALYSES THE SOCI…	#N/A	#N/A	NEW SCHOOL, PARSONS SCH DESIGN, SCH DESIGN STRATEGIES, 2 WEST 13TH ST, NEW YORK, NY 10011, USA;	BLOCKCHAIN; CRYPTOCURRENCY; BITCOIN; INFRASTRUCTURE; PLATFORM; DATA MONEY	10.1080/03085147.2020.1774258	ARTICLE	BITCOIN; ECONOMIZATION; POWER	ECON SOC	ECON. SOC.	ENGLISH	ROUTLEDGE JOURNALS, TAYLOR & FRANCIS LTD	2020	CALISKAN, K (CORRESPONDING AUTHOR), NEW SCH, PARSONS SCH DESIGN, SCH DESIGN STRATEGIES, 2 WEST 13TH ST, NEW YORK, NY 10011 USA.	0308-5147	ECONOMY AND SOCIETY	27	DATA MONEY THE SOCIOTECHNICAL INFRASTRUCTURE OF CRYPTOCURRENCY BLOCKCHAINS	49	ISI	THE NEW SCHOOL	NEW SCH	#N/A	CALISKAN K, 2020, ECON SOC	CALISKAN K, 2020, ECON SOC
CASSIDY J, 2020, EJOURNAL TAX RES	CASSIDY J; CHENG M; LE T; HUANG E	CASSIDY JULIE; CHENG MAN HUNG ALVIN; LE TOAN; HUANG EVA	none	REGULATING CRYPTOCURRENCY IS A DIFFICULT TASK FOR REGULATORS. AT PRESENT, THERE IS NO CLEAR AND AUTHORITATIVE DEFINITION OF CRYPTOCURRENCY. MAKING IT DIFFICULT FOR REGULATORS TO DETERMINE WHICH ASPECTS REQUIRE REGULATION AND, IF SO, HOW TO CONTROL AND MONITOR ACTIVITIES. DEFINING THE LEGAL NATURE OF CRYPTOCURRENCIES IS IMPORTANT. AT ITS MOST FUNDAMENTAL LEVEL THE ANSWER TO THESE MATTERS WILL DETE…	#N/A	#N/A	UNIVERSITY OF AUCKLAND, COMMERCIAL LAW DEPARTMENT, NEW ZEALAND; UNIVERSITY OF NOTTINGHAM, DEPARTMENT OF FINANCE AND ACCOUNTING, UNITED KINGDOM; MONASH UNIVERSITY, DEPARTMENT OF BUSINESS LAW AND TAXATION, MONASH BUSINESS SCHOOL, AUSTRALIA; UNIVERSITY OF CAMBRIDGE JUDGE BUSINESS SCHOOL, UNIVERSITY OF SYDNEY BUSINESS SCHOOL, CAMBRIDGE CENTRE FOR ALTERNATIVE FINANCE, UNITED KINGDOM;	BLOCKCHAIN; CRYPTOCURRENCY; DIGITAL ECONOMY; FINTECH REGULATION; TAXATION	#N/A	ARTICLE	#N/A	EJOURNAL TAX RES	EJOURNAL TAX RES.	ENGLISH	UNIVERSITY OF NEW SOUTH WALES	2020	#N/A	14482398	EJOURNAL OF TAX RESEARCH	2	A TOSS OF A BITCOIN THE UNCERTAIN NATURE OF THE LEGAL STATUS OF CRYPTOCURRENCIES	17	ISI	UNIVERSITY OF AUCKLAND;UNIVERSITY OF NOTTINGHAM;MONASH UNIVERSITY;UNIVERSITY OF SYDNEY BUSINESS SCHOOL	UNIVERSITY OF AUCKLAND;UNIVERSITY OF NOTTINGHAM;MONASH UNIVERSITY;UNIVERSITY OF SYDNEY BUSINESS SCHOOL	#N/A	CASSIDY J, 2020, EJOURNAL TAX RES	CASSIDY J, 2020, EJOURNAL TAX RES
CHOU CC, 2021, J INF SYST	CHOU C; HWANG N; SCHNEIDER G; WANG T; LI C; WEI W	CHOU, CHI-CHUN; HWANG, NEN-CHEN RICHARD; SCHNEIDER, GARY P.; WANG, TAWEI; LI, CHANG-WEI; WEI, WILLIAM	AKHTAR N, 2019, WHAT IS SMART CONTRA; ANONYMOUS, 1974, THEORY OF COMPUTATION; ANTONOPOULOS A, 2019, MASTERING ETHEREUM, V1; APPELBAUM D, 2020, J INF SYST, V34, P5, DOI 10.2308/ISYS-52660; CHOU C, 2020, P 2020 AAA JOINT MID; CHURCH K, 2020, 2020 AAA AIS SECTION; COYNE J, 2017, J EMERG TECHNOL ACCO, V14, P101, DOI 10.2308/JETA-51910; DAI J, 2017, J INF SYST, V31, P5, DOI 10.2308/ISYS-51804; DELOITT…	THIS STUDY EXPLORES HOW TO USE SMART CONTRACT TECHNOLOGY TO IMPLEMENT ACCOUNTING PRINCIPLES FOR PUBLIC USE. TO ILLUSTRATE ITS FEASIBILITY, THIS STUDY DEVELOPS A DESIGN MODEL OF DECENTRALIZED ACCOUNTING CONTRACTS (DACS) AND USES REVENUE RECOGNITION TO DEMONSTRATE HOW TO APPLY THE PROPOSED MODEL. CONSIDERING VARIOUS SCENARIOS OF REVENUE RECOGNITION, THIS STUDY ADOPTS SOLIDITY TO PROGRAMSMART CONTRA…	#N/A	#N/A	CALIF STATE UNIVERSITY MONTEREY BAY, COLL BUSINESS, MARINA, CA 93955, USA; CALIF STATE UNIVERSITY, COLL BUSINESS ADM, DEPT ACCOUNTING, SAN MARCOS, TX, USA; DEPAUL UNIVERSITY, DRIEHAUS COLL BUSINESS, SCH ACCOUNTANCY & MIS, CHICAGO, IL 60604, USA; NATIONAL CHENGCHI UNIVERSITY, DEPT ACCOUNTING, NEW TAIPEI, TAIWAN; FOXCONN TECHNOL GRP, TAIPEI, TAIWAN;	SMART CONTRACT; BLOCKCHAIN; DECENTRALIZED CONTRACT; ACCOUNTING; REVENUE RECOGNITION	10.2308/ISYS-19-009	ARTICLE	#N/A	J INF SYST	J. INF. SYST.	ENGLISH	AMER ACCOUNTING ASSOC	2021	CHOU, CC (CORRESPONDING AUTHOR), CALIF STATE UNIV MONTEREY BAY, COLL BUSINESS, MARINA, CA 93955 USA.	0888-7985	JOURNAL OF INFORMATION SYSTEMS	4	USING SMART CONTRACTS TO ESTABLISH DECENTRALIZED ACCOUNTING CONTRACTS AN EXAMPLE OF REVENUE RECOGNITION	35	ISI	CALIFORNIA STATE UNIVERSITY SYSTEM; CALIFORNIA STATE UNIVERSITY MONTEREY BAY; CALIFORNIA STATE UNIVERSITY SYSTEM; CALIFORNIA STATE UNIVERSITY SAN MARCOS; DEPAUL UNIVERSITY; NATIONAL CHENGCHI UNIVERSITY; HON HAI PRECISION INDUSTRY	CALIF STATE UNIV MONTEREY BAY	#N/A	CHOU CC, 2021, J INF SYST	CHOU CC, 2021, J INF SYST
CHOU JH, 2022, STUD ECON FINANC	CHOU J; AGRAWAL P; BIRT J	CHOU, JUN HENG; AGRAWAL, PRERANA; BIRT, JACQUELINE	ABDO H, 2016, AUST ACCOUNT REV, V26, P346, DOI 10.1111/AUAR.12106; ALLEN A, 2018, 2545378 SSRN; ANONYMOUS, 2018, CONC FRAM FIN REP; BAMBER M, 2016, BRIT ACCOUNT REV, V48, P59, DOI 10.1016/J.BAR.2015.03.003; BAUR D, 2021, FINANC RES LETT, V38, DOI 10.1016/J.FRL.2020.101431; BAUR D, 2019, FINANC RES LETT, V31, P78, DOI 10.1016/J.FRL.2019.04.023; BAYERLEIN L, 2012, ASIAN REV ACCOUNT, V20, P93, DOI 1…	PURPOSE THE PURPOSE OF THIS PAPER IS TO ANALYSE STAKEHOLDERS' PERCEPTIONS ON THE ACCOUNTING OF CRYPTO-ASSETS. THEY ALSO LOOK AT THE NEED TO AMEND/CLARIFY EXISTING ACCOUNTING STANDARDS OR DEVELOP NEW ACCOUNTING STANDARDS. DESIGN/METHODOLOGY/APPROACH THE AUTHORS USE A QUALITATIVE APPROACH FEATURING INTERVIEWS WITH FOUR STAKEHOLDER GROUPS INCLUDING ACADEMICS, PROFESSIONAL BODIES, STANDARD SETTERS AN…	#N/A	#N/A	UNIVERSITY WESTERN AUSTRALIA, UWA BUSINESS SCH, DEPT ACCOUNTING & FINANCE, PERTH, WA, AUSTRALIA;	CRYPTO ASSETS; IFRS; FINANCIAL REPORTING; INTERVIEWS; STANDARD SETTING PROCESS; STAKEHOLDERS; LEGITIMACY; QUALITATIVE STUDY	10.1108/SEF-10-2021-0469	ARTICLE	IFRS; ADOPTION; EUROPE; UK	STUD ECON FINANC	STUD. ECON. FINANC.	ENGLISH	EMERALD GROUP PUBLISHING LTD	2022	AGRAWAL, P (CORRESPONDING AUTHOR), UNIV WESTERN AUSTRALIA, UWA BUSINESS SCH, DEPT ACCOUNTING & FINANCE, PERTH, WA, AUSTRALIA.	1086-7376	STUDIES IN ECONOMICS AND FINANCE	6	ACCOUNTING FOR CRYPTOASSETS STAKEHOLDERS PERCEPTIONS	39	ISI	UNIVERSITY OF WESTERN AUSTRALIA	UNIV WESTERN AUSTRALIA	#N/A	CHOU JH, 2022, STUD ECON FINANC	CHOU JH, 2022, STUD ECON FINANC
CHURCH KS, 2021, J EMERG TECHNOL ACCO	CHURCH K; SMITH S; KINORY E	CHURCH, KIMBERLY SWANSON; SMITH, SEAN STEIN; KINORY, ETHAN	ANONYMOUS, 2016, HARVARD BUS REV; BERKE A, 2017, SAFE ARE BLOCKCHAINS; BORITZ J, 2015, J INF SYST, V29, P9, DOI 10.2308/ISYS-50896; BORTHICK AF, 2017, J INF SYST, V31, P1, DOI 10.2308/ISYS-10554; CHURCH K, 2020, J INF SYST, V34, P23, DOI 10.2308/ISYS-18-037; COHEN L, 2016, INTERNATIONAL FINANCIAL LAW REVIEW, P9; COYNE J, 2017, J EMERG TECHNOL ACCO, V14, P101, DOI 10.2308/JETA-51910; CPA CANADA AN…	BLOCKCHAIN TECHNOLOGY, COMMONLY ASSOCIATED WITH BITCOIN CRYPTOCURRENCY, ATTRACTED LARGE AMOUNTS OF INVESTMENT, ATTENTION, AND ANALYSIS. IN ADDITION TO ATTRACTING THE ATTENTION OF INVESTORS, SPECULATORS, AND REGULATORS, IMPLICATIONS FOR FINANCIAL PRACTITIONERS AND ORGANIZATIONS ARE INCREASINGLY APPARENT. FINANCIAL TRANSACTIONS, PROPERTY TRANSFERS, AUDIT AND ATTESTATION SERVICES, SUPPLY CHAINS, AND…	#N/A	#N/A	MISSOURI STATE UNIVERSITY, SCH ACCOUNTANCY, SPRINGFIELD, MO 65897, USA; CUNY, LEHMAN COLL, DEPT ECON & BUSINESS, BRONX, NY, USA; RUTGERS STATE UNIVERSITY, SCH BUSINESS, ACCOUNTING DEPT, CAMDEN, NJ, USA;	BLOCKCHAIN; ACCOUNTING; USE CASE; DISRUPTIVE TECHNOLOGY; EMERGING TECHNOLOGY; HYPERLEDGER	10.2308/JETA-19-11-01-43	ARTICLE	INFORMATION-TECHNOLOGY; ANALYTICS	J EMERG TECHNOL ACCO	J. EMERG. TECHNOL. ACCOUNT.	ENGLISH	AMER ACCOUNTING ASSOC	2021	CHURCH, KS (CORRESPONDING AUTHOR), MISSOURI STATE UNIV, SCH ACCOUNTANCY, SPRINGFIELD, MO 65897 USA.	1554-1908	JOURNAL OF EMERGING TECHNOLOGIES IN ACCOUNTING	4	ACCOUNTING IMPLICATIONS OF BLOCKCHAIN A HYPERLEDGER COMPOSER USE CASE FOR INTANGIBLE ASSETS	18	ISI	MISSOURI STATE UNIVERSITY; CITY UNIVERSITY OF NEW YORK (CUNY) SYSTEM; LEHMAN COLLEGE (CUNY); RUTGERS UNIVERSITY SYSTEM; RUTGERS UNIVERSITY NEW BRUNSWICK; RUTGERS UNIVERSITY CAMDEN	MISSOURI STATE UNIV	#N/A	CHURCH KS, 2021, J EMERG TECHNOL ACCO	CHURCH KS, 2021, J EMERG TECHNOL ACCO
CONG LW, 2023, J ACCOUNT ECON	CONG L; LANDSMAN W; MAYDEW E; RABETTI D	CONG, LIN WILLIAM; LANDSMAN, WAYNE; MAYDEW, EDWARD; RABETTI, DANIEL	ALOOSH A, 2022, DIRECT EVIDENCE OF BITCOIN WASH TRADING; ALSTADSAETER A, 2022, EVIDENCE FROM DUBAI; AMIRAM D, 2022, COOKING THE ORDER BOOKS: INFORMATION MANIPULATION AND COMPETITION AMONG CRYPTO EXCHANGES; AMIRAM D, 2022, J ACCOUNT RES, V60, P427, DOI 10.1111/1475-679X.12430; AMIRAM D, 2015, REV ACCOUNT STUD, V20, P1540, DOI 10.1007/S11142-015-9333-Z; ANDERSON C, 2022, ACCOUNTING FOR CRYPTOCURREN…	WE DESCRIBE THE TAXATION LANDSCAPE IN THE CRYPTOCURRENCY MARKETS, ESPECIALLY CONCERNING U.S. TAXPAYERS, AND EXAMINE HOW RECENT INCREASES IN TAX SCRUTINY HAVE LED TO CHANGES IN CRYPTO INVESTORS' TRADING BEHAVIOR. WE ARGUE CONCEPTUALLY AND THEN EMPIRICALLY DOCUMENT THAT INCREASED TAX SCRUTINY LEADS CRYPTO INVESTORS TO UTILIZE CONVENTIONAL TAX PLANNING WITH TAX-LOSS HARVESTING AS AN ALTERNATIVE TO N…	#N/A	#N/A	CORNELL UNIVERSITY, ITHACA, NY, USA; NBER, CAMBRIDGE, MA, USA; UNIVERSITY NORTH CAROLINA, CHAPEL HILL, NC, USA; NATIONAL UNIVERSITY SINGAPORE, SINGAPORE, SINGAPORE;	BITCOIN; CRYPTOCURRENCY; DEFI; IRS; NFT; REGULATION; TAXATION; TRADING BEHAVIOR	10.1016/j.jacceco.2023.101607	ARTICLE	CAPITAL-GAINS TAXES; EVASION; FIRMS	J ACCOUNT ECON	J. ACCOUNT. ECON.	ENGLISH	ELSEVIER	2023	RABETTI, D (CORRESPONDING AUTHOR), NATL UNIV SINGAPORE, SINGAPORE, SINGAPORE.	0165-4101	JOURNAL OF ACCOUNTING & ECONOMICS	3	TAXLOSS HARVESTING WITH CRYPTOCURRENCIES	76	ISI	CORNELL UNIVERSITY; NATIONAL BUREAU OF ECONOMIC RESEARCH; UNIVERSITY OF NORTH CAROLINA; UNIVERSITY OF NORTH CAROLINA CHAPEL HILL; NATIONAL UNIVERSITY OF SINGAPORE	NATL UNIV SINGAPORE	#N/A	CONG LW, 2023, J ACCOUNT ECON	CONG LW, 2023, J ACCOUNT ECON
CORBET S, 2020, CRYPTOCURRENCY AND BLOCKCHAIN TECHNOL	CORBET S; URQUHART A; YAROVAYA L	CORBET SHAEN; URQUHART ANDREW; YAROVAYA LARISA	none	THIS HANDBOOK WILL PROVIDE A COMPREHENSIVE TREATMENT OF THE GAMUT OF ISSUES AND CHALLENGES THAT EXIST THROUGH THE DEVELOPMENT OF BOTH CRYPTOCURRENCIES AND BLOCKCHAIN TECHNOLOGY. THIS WILL NOT BE CONFINED TO SIMPLY THE INVESTMENT POTENTIAL WITHIN THESE NEW TECHNOLOGICAL AREAS. WE WILL EXAMINE THE CHALLENGES IN THE REGULATORY, LEGAL, TAXATION, ACCOUNTING, MODELLING, ETHICAL, MACROECONOMIC IMPACT AN…	#N/A	978-311066080-7; 978-311065943-6	DUBLIN CITY UNIVERSITY BUSINESS SCHOOL, DUBLIN, IRELAND; ICMA CENTRE, HENLEY BUSINESS SCHOOL, UNITED KINGDOM; SOUTHAMPTON BUSINESS SCHOOL, UNIVERSITY OF SOUTHAMPTON, UNITED KINGDOM;	ALTERNATIVE INVESTMENTS; BLOCKCHAIN; CRYPTOCURRENCY; DIGITAL FINANCE; FINANCIAL MARKETS	10.1515/9783110660807	BOOK	#N/A	CRYPTOCURRENCY AND BLOCKCHAIN TECHNOL	CRYPTOCURRENCY AND BLOCKCHAIN TECHNOL.	ENGLISH	DE GRUYTER	2020	#N/A	#N/A	CRYPTOCURRENCY AND BLOCKCHAIN TECHNOLOGY	7	CRYPTOCURRENCY AND BLOCKCHAIN TECHNOLOGY	#N/A	ISI	DUBLIN CITY UNIVERSITY BUSINESS SCHOOL;HENLEY BUSINESS SCHOOL;UNIVERSITY OF SOUTHAMPTON	DUBLIN CITY UNIVERSITY BUSINESS SCHOOL;HENLEY BUSINESS SCHOOL;UNIVERSITY OF SOUTHAMPTON	#N/A	CORBET S, 2020, CRYPTOCURRENCY AND BLOCKCHAIN TECHNOL	CORBET S, 2020, CRYPTOCURRENCY AND BLOCKCHAIN TECHNOL
COYNE JG, 2017, J EMERG TECHNOL ACCO	COYNE J; MCMICKLE P	COYNE, JOSHUA G.; MCMICKLE, PETER L.	AKKOYUNLU E, 1975, OPERATING SYSTEMS REVIEW, V9, P67, DOI 10.1145/1067629.806523; ANDERSEN N, 2016, BLOCKCHAIN TECHNOLOGY: A GAME-CHANGER IN ACCOUNTING?; BAKEY P, 2016, BLOCKCHAIN IS RESHAP; BRAKEVILLE S, 2016, BLOCKCHAIN BASICS: INTRODUCTION TO DISTRIBUTED LEDGERS. S.L; BUTERIN V, 2014, ETHEREUM BLOG; BYSTROM H, 2016, WORKING PAPER; CHESTER J, 2016, BLOCKCHAIN WARS STAR; GOODIN D, 2014, BITCOIN …	THE BLOCKCHAIN HAS ENABLED THE SUCCESSFUL CREATION OF DECENTRALIZED DIGITAL CURRENCY NETWORKS. THIS SUCCESS HAS PROMPTED FURTHER INVESTIGATION INTO THE USEFULNESS OF BLOCKCHAINS IN OTHER BUSINESS SETTINGS. BECAUSE OF THE BLOCKCHAIN'S USE AS A LEDGER, THE QUESTION ARISES WHETHER THE BLOCKCHAIN COULD BECOME A MORE SECURE ALTERNATIVE TO CURRENT ACCOUNTING LEDGERS. WE SHOW THAT THIS IS INFEASIBLE. BY…	#N/A	#N/A	UNIVERSITY OF MEMPHIS, MEMPHIS, TN 38152, USA;	ACCOUNTING; BLOCKCHAIN; LEDGER; DATABASE	10.2308/jeta-51910	ARTICLE	#N/A	J EMERG TECHNOL ACCO	J. EMERG. TECHNOL. ACCOUNT.	ENGLISH	AMER ACCOUNTING ASSOC	2017	COYNE, JG (CORRESPONDING AUTHOR), UNIV MEMPHIS, MEMPHIS, TN 38152 USA.	1554-1908	JOURNAL OF EMERGING TECHNOLOGIES IN ACCOUNTING	101	CAN BLOCKCHAINS SERVE AN ACCOUNTING PURPOSE	14	ISI	UNIVERSITY OF MEMPHIS	UNIV MEMPHIS	#N/A	COYNE JG, 2017, J EMERG TECHNOL ACCO	COYNE JG, 2017, J EMERG TECHNOL ACCO
CYRUS R, 2023, THE EMERALD HANDB ON CRYPTOASSETS: INVEST OPPOR AND CHALLENGES	CYRUS R	CYRUS ROCHER	none	ALTHOUGH FEW FULLY UNDERSTAND THE EVOLVING SCIENCE OF BLOCKCHAIN TECHNOLOGY, MANY AGREE THAT SUCH TECHNOLOGY PROMISES COUNTLESS CRYPTO INNOVATIVE APPLICATIONS. HOWEVER, INSTITUTIONS USING BLOCKCHAIN AND CRYPTOASSETS FACE ISSUES. SINCE MORE INSTITUTIONS ARE BEGINNING TO EXPLORE VARIOUS PRIVATE, PUBLIC, AND HYBRID BLOCKCHAINS AND THEIR RELATED CRYPTOASSETS, AN INCREASED NEED EXISTS TO UNDERSTAND AN…	#N/A	978-180455320-6; 978-180455321-3	GLOBAL INTERNATIONAL MANAGEMENT (GIM.CPA), USA;	BLOCKCHAIN; COMPLIANCE; CRYPTO ASSETS; CUSTODY; PROVENANCE; REPORTING	10.1108/978-1-80455-320-620221016	BOOK CHAPTER	#N/A	THE EMERALD HANDB ON CRYPTOASSETS: INVEST OPPOR AND CHALLENGES	THE EMERALD HANDB. ON CRYPTOASSETS: INVEST. OPPOR. AND CHALLENGES	ENGLISH	EMERALD GROUP PUBLISHING LTD.	2023	#N/A	#N/A	THE EMERALD HANDBOOK ON CRYPTOASSETS: INVESTMENT OPPORTUNITIES AND CHALLENGES	2	CUSTODY PROVENANCE AND REPORTING OF BLOCKCHAIN AND CRYPTOASSETS	#N/A	ISI	#N/A	NOTREPORTED	#N/A	CYRUS R, 2023, THE EMERALD HANDB ON CRYPTOASSETS: INVEST OPPOR AND CHALLENGES	CYRUS R, 2023, THE EMERALD HANDB ON CRYPTOASSETS: INVEST OPPOR AND CHALLENGES
DAI J, 2017, J INF SYST	DAI J; VASARHELYI M	DAI, JUN; VASARHELYI, MIKLOS A.	AICPA, 2015, AUD AN CONT AUD LOOK; ALLES M, 2002, AUDITING-J PRACT TH, V21, P125, DOI 10.2308/AUD.2002.21.1.125; ALLISON I, 2015, DELOITTE LIBRA ACCEN; ANONYMOUS, 2016, J EMERG TECHNOL ACCO, V13, P1, DOI 10.2308/JETA-10494; ANONYMOUS, 2015, WALL STREET J WSJ; ANONYMOUS, 2016, BLOCKCHAIN IN INTERNET OF THINGS: CHALLENGES AND SOLUTIONS; ANONYMOUS, 2016, WHAT'S NEXT FOR BLOCKCHAIN IN 2016?; ATZORI M…	SINCE 2009, BLOCKCHAIN HAS SERVED AS A POTENTIALLY TRANSFORMATIVE INFORMATION TECHNOLOGY EXPECTED TO BE AS REVOLUTIONARY AS THE INTERNET. ORIGINALLY DEVELOPED AS A METHODOLOGY TO RECORD CRYPTOCURRENCY TRANSACTIONS, BLOCKCHAIN'S FUNCTIONALITY HAS EVOLVED INTO A LARGE NUMBER OF APPLICATIONS, SUCH AS BANKING, FINANCIAL MARKETS, INSURANCE, VOTING SYSTEMS, LEASING CONTRACTS, AND GOVERNMENT SERVICE. DE…	#N/A	#N/A	RUTGERS STATE UNIVERSITY, NEWARK, NJ 07102, USA; SOUTHWESTERN UNIVERSITY FINANCE & ECON, CHENGDU, SICHUAN, CHINA;	BLOCKCHAIN; SMART CONTRACT; ACCOUNTING; ASSURANCE	10.2308/isys-51804	ARTICLE	SMART CONTRACTS; ERP SYSTEMS; ENTERPRISE; ADOPTION; IMPACT; INTERNET; DETERMINANTS; FRAMEWORK; FUTURE	J INF SYST	J. INF. SYST.	ENGLISH	AMER ACCOUNTING ASSOC	2017	DAI, J (CORRESPONDING AUTHOR), RUTGERS STATE UNIV, NEWARK, NJ 07102 USA.; DAI, J (CORRESPONDING AUTHOR), SOUTHWESTERN UNIV FINANCE & ECON, CHENGDU, SICHUAN, PEOPLES R CHINA.	0888-7985	JOURNAL OF INFORMATION SYSTEMS	297	TOWARD BLOCKCHAINBASED ACCOUNTING AND ASSURANCE	31	ISI	RUTGERS UNIVERSITY SYSTEM; RUTGERS UNIVERSITY NEWARK; RUTGERS UNIVERSITY NEW BRUNSWICK; SOUTHWESTERN UNIVERSITY OF FINANCE AND ECONOMICS	RUTGERS STATE UNIV;SOUTHWESTERN UNIV FINANCE AND ECON	#N/A	DAI J, 2017, J INF SYST	DAI J, 2017, J INF SYST
DAI J, 2019, J EMERG TECHNOL ACCO	DAI J; HE N; YU H	DAI, JUN; HE, NA; YU, HAIZONG	ALLES M, 2008, J INF SYST, V22, P195, DOI 10.2308/JIS.2008.22.2.195, DOI 10.2308/JIS.2008.22.2.195; ANONYMOUS, 2016, J EMERG TECHNOL ACCO, V13, P1, DOI 10.2308/JETA-10494; ANONYMOUS, ENV LAW; AUSTIN A, 2018, WORKING PAPER; BROWN-LIBURD H, 2015, ACCOUNT HORIZ, V29, P451, DOI 10.2308/ACCH-51023; BURRITT R, 2016, ASIAN JOURNAL OF SUSTAINABILITY AND SOCIAL RESPONSIBILITY, V1, P23, DOI DOI 10.1186/S41…	INDUSTRY 4.0 USES MANY TECHNOLOGIES, SUCH AS SMART SENSORS AND IOT, TO FUNDAMENTALLY IMPROVE MANUFACTURING PROCESSES. THESE ADVANCED TOOLS CAN ALSO BE UTILIZED BY AUDITORS FOR THE PURPOSE OF ACHIEVING REALTIME AUDITING AND MONITORING, PUSHING THE PROFESSION TOWARD A NEW GENERATION: "AUDIT 4.0.'' BLOCKCHAINS AND SMART CONTRACTS SHOULD BE UTILIZED TO OVERCOME NEW CHALLENGES IN THE TRANSFORMATION TO…	#N/A	#N/A	SOUTHWESTERN UNIVERSITY FINANCE & ECON, CHENGDU, CHINA;	AUDIT 4.0; INDUSTRY 4.0; INTERNET OF THINGS; BLOCKCHAIN; SMART CONTRACT; AIR POLLUTION	10.2308/jeta-52482	ARTICLE	IMPACT	J EMERG TECHNOL ACCO	J. EMERG. TECHNOL. ACCOUNT.	ENGLISH	AMER ACCOUNTING ASSOC	2019	DAI, J (CORRESPONDING AUTHOR), SOUTHWESTERN UNIV FINANCE & ECON, CHENGDU, PEOPLES R CHINA.	1554-1908	JOURNAL OF EMERGING TECHNOLOGIES IN ACCOUNTING	29	UTILIZING BLOCKCHAIN AND SMART CONTRACTS TO ENABLE AUDIT 40 FROM THE PERSPECTIVE OF ACCOUNTABILITY AUDIT OF AIR POLLUTION CONTROL IN CHINA	16	ISI	SOUTHWESTERN UNIVERSITY OF FINANCE AND ECONOMICS	SOUTHWESTERN UNIV FINANCE AND ECON	#N/A	DAI J, 2019, J EMERG TECHNOL ACCO	DAI J, 2019, J EMERG TECHNOL ACCO
DAVENPORT SA, 2023, J EMERG TECHNOL ACCO	DAVENPORT S; USREY S	DAVENPORT, STEPHAN A.; USREY, SPENCER C.	ANONYMOUS, 2009, GLOBAL FINANCIAL STABILITY REPORT; BIDEN J, 2022, EXECUTIVE ORDER ON ENSURING RESPONSIBLE DEVELOPMENT OF DIGITAL ASSETS; BIDEN J, 2022, BUDGET OF THE U.S. GOVERNMENT; BLANDIN A, 2019, GLOBAL CRYPTOASSET REGULATORY LANDSCAPE STUDY; BLANDIN A, 2020, 3RD GLOBAL CRYPTOASSET BENCHMARKING STUDY; BLOOMBERG LAW, 2021, CRYPTOCURRENCY LAWS AND REGULATIONS BY STATE; BOURI E, 2020, Q REV ECO…	CRYPTO ASSETS ARE A DIVERSE GROUP OF DIGITAL ASSETS WITH DIFFERENT ORIGINS AND USES THAT HAVE BECOME A WIDELY ACCEPTED PART OF THE GLOBAL FINANCIAL SYSTEM. AS THE USE OF CRYPTO ASSETS HAS GROWN, IRS GUIDANCE RELATED TO THEIR TAX CLASSIFICATION HAS NOT CHANGED. ALTHOUGH THE COMPLEXITY OF CRYPTO ASSETS INCREASES THE DIFFICULTY OF REGULATION AND TAXATION, THE SEC AND CFTC HAVE ASSERTED THEIR AUTHORI…	#N/A	#N/A	UNIVERSITY TENNESSEE CHATTANOOGA, GARY W ROLLINS COLL BUSINESS, DEPT ACCOUNTING, CHATTANOOGA, TN 37403, USA;	CRYPTO ASSETS; REGULATION; TAXATION; PROPERTY; CURRENCY; COMMODITY; SECURITIES	10.2308/JETA-2022-033	ARTICLE	BITCOIN	J EMERG TECHNOL ACCO	J. EMERG. TECHNOL. ACCOUNT.	ENGLISH	AMER ACCOUNTING ASSOC	2023	DAVENPORT, SA (CORRESPONDING AUTHOR), UNIV TENNESSEE CHATTANOOGA, GARY W ROLLINS COLL BUSINESS, DEPT ACCOUNTING, CHATTANOOGA, TN 37403 USA.	1554-1908	JOURNAL OF EMERGING TECHNOLOGIES IN ACCOUNTING	0	CRYPTO ASSETS EXAMINING POSSIBLE TAX CLASSIFICATIONS	20	ISI	UNIVERSITY OF TENNESSEE SYSTEM; UNIVERSITY OF TENNESSEE AT CHATTANOOGA	UNIV TENNESSEE CHATTANOOGA	#N/A	DAVENPORT SA, 2023, J EMERG TECHNOL ACCO	DAVENPORT SA, 2023, J EMERG TECHNOL ACCO
DERUN I, 2022, ECON ANN-XXI	DERUN I; MYSAKA H	DERUN, IVAN; MYSAKA, HANNA	ALBRECHT C, 2019, J MONEY LAUND CONTRO, V22, P210, DOI 10.1108/JMLC-12-2017-0074; ANKENBRAND T, 2020, 2020 CRYPTO VALLEY CONFERENCE ON BLOCKCHAIN TECHNOLOGY (CVCBT 2020), P16, DOI 10.1109/CVCBT50464.2020.00006; ANONYMOUS, 2010, CONCEPTUAL FRAMEWORK FOR FINANCIAL REPORTING; BAUR D, 2018, J INT FINANC MARK I, V54, P177, DOI 10.1016/J.INTFIN.2017.12.004; BBC, 2021, BBC 0606; BURNIE A, 2018, LEDGER-P…	INTRODUCTION. THE TRANSITION TO DIGITAL TECHNOLOGIES STIMULATED THE EMERGENCE OF NEW ACCOUNTING OBJECTS IN THE FORM OF DIGITAL ASSETS WHOSE FEATURES ARE PROBLEMATIC FOR BEING DISPLAYED IN A RATHER TIGHTLY REGULATED SYSTEM OF ACCOUNTING AND REPORTING STANDARDS. IN THE CONTEXT OF EMERGING NEW WAYS OF USING CRYPTO ASSETS IN BUSINESS PRACTICE AND INCREASING THE VOLUME OF TRANSACTIONS WITH THEM, ACCOU…	#N/A	#N/A	TARAS SHEVCHENKO NATIONAL UNIVERSITY KYIV, DEPT ACCOUNTING & AUDITING, 90A VASYLKIVSKA STR, UA-03022 KIEV, UKRAINE;	CRYPTO ASSETS; CRYPTOCURRENCY; DIGITAL ASSETS; NON-CRYPTO ASSETS	10.21003/ea.V195-06	ARTICLE	CRYPTOCURRENCIES; CRYPTOASSETS	ECON ANN-XXI	ECON. ANN.-XXI	ENGLISH	INST SOC TRANSFORMATION	2022	DERUN, I (CORRESPONDING AUTHOR), TARAS SHEVCEHNKO NATL UNIV KYIV, DEPT ACCOUNTING & AUDITING, 90A VASYLKIVSKA STR, UA-03022 KIEV, UKRAINE.	1728-6220	ECONOMIC ANNALS-XXI	1	DIGITAL ASSETS IN ACCOUNTING THE CONCEPT FORMATION AND THE FURTHER DEVELOPMENT TRAJECTORY	195	ISI	TARAS SHEVCHENKO NATL UNIV KYIV	TARAS SHEVCHENKO NATL UNIV KYIV	#N/A	DERUN I, 2022, ECON ANN-XXI	DERUN I, 2022, ECON ANN-XXI
DESAI H, 2023, INT J DIGIT ACCOUNT RES	DESAI H	DESAI HRISHIKESH	none	BLOCKCHAIN, OR DISTRIBUTED LEDGER TECHNOLOGY, IS ACKNOWLEDGED AS THE MOST SIGNIFICANT AND DISRUPTIVE INNOVATION IN ACCOUNTING SINCE THE DOUBLE-ENTRY SYSTEM. ALL THE ‘BIG FOUR’ ACCOUNTING FIRMS AND SEVERAL MAJOR S&P500 COMPANIES HAVE INVESTED CONSIDERABLE RESOURCES IN DEVELOPING BLOCKCHAIN TECHNOLOGIES. SOME MAXIMALISTS OF THIS TECHNOLOGY HAVE EVEN HINTED THAT IT WILL FUNDAMENTALLY CHANGE ACCOUNTI…	#N/A	#N/A	ARKANSAS STATE UNIVERSITY, USA;	BLOCKCHAIN; CRYPTO; DISTRIBUTED LEDGER TECHNOLOGY; PRACTICE; TEACHING	10.4192/1577-8517-v23_5	ARTICLE	#N/A	INT J DIGIT ACCOUNT RES	INT. J. DIGIT. ACCOUNT. RES.	ENGLISH	UNIVERSIDAD DE HUELVA	2023	H. DESAI; ARKANSAS STATE UNIVERSITY, UNITED STATES; EMAIL: HDESAI@ASTATE.EDU	15778517	INTERNATIONAL JOURNAL OF DIGITAL ACCOUNTING RESEARCH	0	INFUSING BLOCKCHAIN IN ACCOUNTING CURRICULA AND PRACTICE EXPECTATIONS CHALLENGES AND STRATEGIES	23	ISI	ARKANSAS STATE UNIVERSITY	NOTREPORTED;ARKANSAS STATE UNIVERSITY;NOTREPORTED	#N/A	DESAI H, 2023, INT J DIGIT ACCOUNT RES	DESAI H, 2023, INT J DIGIT ACCOUNT RES
DUNN RT, 2021, ISS ACCOUNT EDUC	DUNN R; JENKINS J; SHELDON M	DUNN, RYAN T.; JENKINS, J. GREGORY; SHELDON, MARK D.	APPELBAUM D, 2020, J INF SYST, V34, P5, DOI 10.2308/ISYS-52660; BACK A, 2017, WALL STREET J E EDIT, PB12; BEMILLER S, 2009, ISS ACCOUNT EDUC, V24, P219, DOI 10.2308/IACE.2009.24.2.219; BLOOM B, 1956, TAXONOMY OF EDUCATIONAL OBJECTIVES.; BURNISKE C, 2018, CRYPTOASSETS: THE INNOVATIVE INVESTOR'S GUIDE TO BITCOIN AND BEYOND; CHUN M, 2010, CHANGE: THE MAGAZINE OF HIGHER LEARNING, V42, P22, DOI DOI 10…	THIS CASE EXAMINES AUDITING IMPLICATIONS OF BITCOIN AND BLOCKCHAIN, AND IS INTENDED FOR EITHER UNDERGRADUATE OR GRADUATE AUDITING AND ASSURANCE COURSES. STUDENTS ARE ASKED TO ENGAGE IN ASPECTS OF PLANNING AND RISK ASSESSMENT FOR THE AUDIT OF AN ONLINE RETAILER. THE CASE PROVIDES AN INTERESTING SETTING IN WHICH TO ACHIEVE THE LEARNING OBJECTIVES OF: (1) IDENTIFYING RISKS OF MATERIAL MISSTATEMENT, …	#N/A	#N/A	AUBURN UNIVERSITY, HARBERT COLL BUSINESS, SCH ACCOUNTANCY, AUBURN, AL 36849, USA; JOHN CARROLL UNIVERSITY, BOLER COLL BUSINESS, KRAMER SCH ACCOUNTANCY & INFORMAT SCI, CLEVELAND, OH 44118, USA;	BITCOIN; BLOCKCHAIN; AUDITING; RISK; SOC REPORTING; SPECIALIST	10.2308/ISSUES-19-049	ARTICLE	#N/A	ISS ACCOUNT EDUC	ISS. ACCOUNT. EDUC.	ENGLISH	AMER ACCOUNTING ASSOC	2021	DUNN, RT (CORRESPONDING AUTHOR), AUBURN UNIV, HARBERT COLL BUSINESS, SCH ACCOUNTANCY, AUBURN, AL 36849 USA.	0739-3172	ISSUES IN ACCOUNTING EDUCATION	4	BITCOIN AND BLOCKCHAIN AUDIT IMPLICATIONS OF THE KILLER BS	36	ISI	AUBURN UNIVERSITY SYSTEM; AUBURN UNIVERSITY; UNIVERSITY SYSTEM OF OHIO; JOHN CARROLL UNIVERSITY	AUBURN UNIV	#N/A	DUNN RT, 2021, ISS ACCOUNT EDUC	DUNN RT, 2021, ISS ACCOUNT EDUC
DYBALL MC, 2022, ACCOUNT AUDIT ACCOUN	DYBALL M; SEETHAMRAJU R	DYBALL, MARIA CADIZ; SEETHAMRAJU, RAVI	AIT NEWS DESK, 2021, BLOCKCH HACK STOL 3; ANDON P, 2015, ACCOUNT AUDIT ACCOUN, V28, P1400, DOI 10.1108/AAAJ-01-2015-1932; ANONYMOUS, 2018, BLOCKCHAIN AND THE FUTURE OF ACCOUNTANCY; ASSOCIATION OF CHARTERED CERTIFIED ACCOUNTANTS (ACCA) AND CPA CANADA, 2017, DIV WE FALL DISTR WE; AUSTRALIAN GOVERNMENT AUDITING AND ASSURANCE STANDARDS BOARD, 2019, AUD STAND ASA 700 FO; AUSTRALIAN GOVERNMENT AUDITING…	PURPOSE THE PAPER REPORTS ON A STUDY THAT INVESTIGATED THE (POTENTIAL) IMPACT OF CLIENT USE OF BLOCKCHAIN TECHNOLOGY ON FINANCIAL STATEMENT AUDITS OF AUSTRALIAN ACCOUNTING FIRMS. DESIGN/METHODOLOGY/APPROACH DATA WERE PRIMARILY COLLECTED FROM SEMI-STRUCTURED INTERVIEWS WITH A RANGE OF STAKEHOLDERS INCLUDING AUDIT PARTNERS FROM FIRST- AND SECOND-TIER ACCOUNTING FIRMS IN AUSTRALIA. THE INTERVIEWS FO…	#N/A	#N/A	UNIVERSITY SYDNEY, BUSINESS SCH, SYDNEY, NSW, AUSTRALIA;	CRYPTOCURRENCY; BLOCKCHAIN; AUDITING	10.1108/AAAJ-07-2020-4681	ARTICLE	INDUSTRY SPECIALIZATION; INFORMATION; PROFESSIONALISM; CHALLENGES; FIELD; RISK	ACCOUNT AUDIT ACCOUN	ACCOUNT. AUDIT ACCOUNT.	ENGLISH	EMERALD GROUP PUBLISHING LTD	2022	DYBALL, MC (CORRESPONDING AUTHOR), UNIV SYDNEY, BUSINESS SCH, SYDNEY, NSW, AUSTRALIA.	0951-3574	ACCOUNTING AUDITING & ACCOUNTABILITY JOURNAL	12	CLIENT USE OF BLOCKCHAIN TECHNOLOGY EXPLORING ITS POTENTIAL IMPACT ON FINANCIAL STATEMENT AUDITS OF AUSTRALIAN ACCOUNTING FIRMS	35	ISI	UNIVERSITY OF SYDNEY	UNIV SYDNEY	#N/A	DYBALL MC, 2022, ACCOUNT AUDIT ACCOUN	DYBALL MC, 2022, ACCOUNT AUDIT ACCOUN
FOMINA O, 2019, BANKS BANK SYST	FOMINA O; MOSHKOVSKA O; AVHUSTOVA O; ROMASHKO O; HOLOVINA D	FOMINA OLENA; MOSHKOVSKA OLENA; AVHUSTOVA OLENA; ROMASHKO OLHA; HOLOVINA DARIA	none	VARIOUS MECHANISMS FOR IMPLEMENTATION, AND AT THE SAME TIME CONTRADICTORY APPROACHES TO THE ESSENCE, EVALUATION, REFLECTION, AND REGULATION, LED TO THE NEED TO CONSIDER AND IMPROVE APPROACHES TO THE RECOGNITION OF CRYPTOCURRENCY. BASED ON THE CRITICAL ANALYSIS OF THE LEGAL PROVISIONS IN UKRAINE AND THE APPROACHES OF SCIENTIFIC EXPERTS, PRACTITIONERS AND INTERNATIONAL EXPERIENCE, THE ECONOMIC ESSE…	#N/A	#N/A	KYIV NATIONAL UNIVERSITY OF TRADE & ECON, FACULTY OF ACCOUNTING, AUDITING AND INFORMATION SYSTEMS, DEPARTMENT OF ACCOUNTING AND TAXATION, UKRAINE;	ACCOUNTING; BANKING; CRYPTOCURRENCY; FINANCIAL ASSETS; INTANGIBLE ASSETS; MONEY	10.21511/bbs.14(2).2019.18	REVIEW	#N/A	BANKS BANK SYST	BANKS BANK SYST.	ENGLISH	LLC CPC BUSINESS PERSPECTIVES	2019	#N/A	18167403	BANKS AND BANK SYSTEMS	5	CURRENT ASPECTS OF THE CRYPTOCURRENCY RECOGNITION IN UKRAINE	14	ISI	KYIV NATIONAL UNIVERSITY OF TRADE AND ECONOMICS	KYIV NATIONAL UNIVERSITY OF TRADE AND ECONOMICS	#N/A	FOMINA O, 2019, BANKS BANK SYST	FOMINA O, 2019, BANKS BANK SYST
FULLER SH, 2020, J CORP ACCOUNT FINAN	FULLER S; MARKELEVICH A	FULLER, STEPHEN H.; MARKELEVICH, ARIEL	ALEXANDER D, 2019, BLOOMBERG; ANONYMOUS, 2016, BLOCKCH TECHN GAM CH; ANONYMOUS, 2016, BLOCKCHAIN SHARING E; ANONYMOUS, 2018, NY TIMES; ARNOLD A, 2018, FORBES; CHARTERED PROFESSIONAL ACCOUNTANTS CANADA AMERICAN INSTITUTE OF CERTIFIED PUBLIC ACCOUNTANTS (AICPA) AND UNIVERSITY OF WATERLOO CENTRE FOR INFORMATION SYSTEMS ASSURANCE (UWCISA), 2017, BLOCKCH TECHN ITS PO;CHARTERED PROFESSIONAL ACCOUNTANTS…	THE USE OF BLOCKCHAIN TECHNOLOGY HAS INCREASED TREMENDOUSLY OVER THE LAST DECADE. BLOCKCHAIN CONTINUES TO EVOLVE AND NEW FEATURES AND CAPABILITIES ARE DEVELOPED CONTINUOUSLY. ALTHOUGH THE USE OF THE TECHNOLOGY STARTED IN CRYPTOCURRENCY (SPECIFICALLY, BITCOIN), IT HAS EXPANDED TO OTHER AREAS THAT CAN BENEFIT FROM A SHARED, SECURE, LEDGER. THIS ARTICLE INVESTIGATES THE POTENTIAL IMPACT OF BLOCKCHAI…	#N/A	#N/A	SUFFOLK UNIVERSITY, SAWYER BUSINESS SCH, ACCOUNTING DEPT, BOSTON, MA 02108, USA;	ACCOUNTING INFORMATION SYSTEMS; BLOCKCHAIN; DISTRIBUTED LEDGER TECHNOLOGY; INFORMATION TECHNOLOGY	10.1002/jcaf.22424	ARTICLE	RESISTANCE	J CORP ACCOUNT FINAN	J. CORP. ACCOUNT. FINANC.	ENGLISH	WILEY PERIODICALS, INC	2020	MARKELEVICH, A (CORRESPONDING AUTHOR), SUFFOLK UNIV, 120 TREMT ST,OFF 5341, BOSTON, MA 02108 USA.	1044-8136	JOURNAL OF CORPORATE ACCOUNTING AND FINANCE	30	SHOULD ACCOUNTANTS CARE ABOUT BLOCKCHAIN	31	ISI	SUFFOLK UNIVERSITY	SUFFOLK UNIV	#N/A	FULLER SH, 2020, J CORP ACCOUNT FINAN	FULLER SH, 2020, J CORP ACCOUNT FINAN
GAN J, 2021, MANAGE SCI	GAN J; TSOUKALAS G; NETESSINE S	GAN JINGXING; TSOUKALAS GERRY; NETESSINE SERGUEI	none	INITIAL COIN OFFERINGS (ICOS) ARE AN EMERGING FORM OF FUNDRAISING FOR BLOCKCHAIN-BASED STARTUPS. WE EXAMINE HOW ICOS CAN BE LEVERAGED IN THE CONTEXT OF ASSET TOKENIZATION, WHEREBY FIRMS ISSUE TOKENS BACKED BY FUTURE ASSETS (I.E., INVENTORY) TO FINANCE GROWTH. WE (I) MAKE SUGGESTIONS ON HOW TO DESIGN SUCH “ASSET-BACKED” ICOS—INCLUDING OPTIMAL TOKEN FLOATING AND PRICING FOR BOTH UTILITY AND EQUITY …	#N/A	#N/A	SOUTHERN METHODIST UNIVERSITY, INFORMATION TECHNOLOGY AND OPERATIONS MANAGEMENT DEPARTMENT, COX SCHOOL OF BUSINESS, DALLAS, 75205, TX, USA; UNIVERSITY OF PENNSYLVANIA, OPERATIONS, INFORMATION AND DECISIONS DEPARTMENT, THE WHARTON SCHOOL, PHILADELPHIA, 19104, PA, USA;	ASSET TOKENIZATION; BLOCKCHAIN; CROWDFUNDING; CRYPTOCURRENCY; ICO; MORAL HAZARD; SECURITY TOKEN OFFERINGS; SPECULATORS; STOS; TOKENIZED INVENTORY	10.1287/mnsc.2020.3796	ARTICLE	ECONOMICS; RISK MANAGEMENT; AGENCY COSTS; CUSTOMER DEMANDS; DEMAND CHARACTERISTICS; MORAL HAZARD; OPERATING STRATEGY; PRODUCT CHARACTERISTICS; SECURITY TOKENS; TOKENIZATION; PRODUCT DESIGN	MANAGE SCI	MANAGE SCI	ENGLISH	INFORMS INST.FOR OPERATIONS RES.AND THE MANAGEMENT SCIENCES	2021	#N/A	00251909	MANAGEMENT SCIENCE	64	INITIAL COIN OFFERINGS SPECULATION AND ASSET TOKENIZATION	67	ISI	SOUTHERN METHODIST UNIVERSITY;UNIVERSITY OF PENNSYLVANIA	SOUTHERN METHODIST UNIVERSITY;UNIVERSITY OF PENNSYLVANIA	#N/A	GAN J, 2021, MANAGE SCI	GAN J, 2021, MANAGE SCI
GAO XX, 2023, GLOB FINANC J	GAO X	GAO, XIAOXUE	AL-SMADI M, 2023, BORSA ISTANB REV, V23, P464, DOI 10.1016/J.BIR.2022.11.016; ALSTADSÆTER A, 2022, J PUBLIC ECON, V206, DOI 10.1016/J.JPUBECO.2021.104587; BABILLA T, 2023, ECON MODEL, V120, DOI 10.1016/J.ECONMOD.2022.106182; BANKOWSKA K, ECB ECONOMIC BULLETIM; BECK T, 2011, J FINANC SERV RES, V39, P35, DOI 10.1007/S10693-010-0085-4; BERTOT J, 2010, GOV INFORM Q, V27, P264, DOI 10.1016/J.GIQ.2010.…	A CRUCIAL ISSUE IN FINANCIAL ECONOMICS PERTAINS TO ENHANCING THE TRANSPARENCY OF ACCOUNTING AND FINANCIAL REPORTING WITHIN COMPANIES. THIS PAPER FOCUSES ON CHINA, AIMING TO QUANTIFY THE RELATIONSHIP BETWEEN DIGITAL FINANCE AND FINANCIAL ACCOUNTING TRANSPARENCY FROM 1990 TO 2021 USING THE AUTOREGRESSIVE DISTRIBUTED LAG BOUNDS TEST. THE RESULTS CONFIRM THAT DIGITAL FINANCE EXERTS A SIGNIFICANT EFFE…	#N/A	#N/A	HUANGHE S&T UNIVERSITY, FAC BUSINESS, ZHENGZHOU 450063, CHINA;	TAXATION; DIGITAL FINANCE; FINANCIAL CORRUPTION; FINANCIAL TRANSPARENCY	10.1016/j.gfj.2023.100903	ARTICLE	SMES	GLOB FINANC J	GLOB. FINANC. J.	ENGLISH	ELSEVIER	2023	GAO, XX (CORRESPONDING AUTHOR), HUANGHE S&T UNIV, FAC BUSINESS, ZHENGZHOU 450063, PEOPLES R CHINA.	1044-0283	GLOBAL FINANCE JOURNAL	0	DIGITAL TRANSFORMATION IN FINANCE AND ITS ROLE IN PROMOTING FINANCIAL TRANSPARENCY	58	ISI	HUANGHE SANDT UNIV	HUANGHE SANDT UNIV	#N/A	GAO XX, 2023, GLOB FINANC J	GAO XX, 2023, GLOB FINANC J
GARANINA T, 2022, ACCOUNT AUDIT ACCOUN	GARANINA T; RANTA M; DUMAY J	GARANINA, TATIANA; RANTA, MIKKO; DUMAY, JOHN	AGNEW H, 2016, AUDITING: PITCH BATTLE; AL-HTAYBAT K, 2018, ACCOUNT EDUC, V27, P333, DOI 10.1080/09639284.2018.1437758; ALLEN D, 2020, RES POLICY, V49, DOI 10.1016/J.RESPOL.2019.103865; ALLES M, 2018, INT J ACCOUNT INF SY, V31, P58, DOI 10.1016/J.ACCINF.2018.09.001; ALVESSON M, 2000, DOING CRITICAL MANAG; ANONYMOUS, 1999, DOING LIT REV; ANONYMOUS, 2018, CONC FRAM FIN REP; ANONYMOUS, 2014, C EUROGR…	PURPOSE THIS PAPER PROVIDES A STRUCTURED LITERATURE REVIEW OF BLOCKCHAIN IN ACCOUNTING. THE AUTHORS IDENTIFY CURRENT TRENDS, ANALYSE AND CRITIQUE THE KEY TOPICS OF RESEARCH AND DISCUSS THE FUTURE OF THIS NASCENT FIELD OF INQUIRY. DESIGN/METHODOLOGY/APPROACH THIS STUDY'S ANALYSIS COMBINED A STRUCTURED LITERATURE REVIEW WITH CITATION ANALYSIS, TOPIC MODELLING USING A MACHINE LEARNING APPROACH AND A…	#N/A	#N/A	UNIVERSITY VAASA, SCH ACCOUNTING & FINANCE, VAASA, FINLAND; MACQUARIE UNIVERSITY, DEPT ACCOUNTING & CORP GOVERNANCE, SYDNEY, NSW, AUSTRALIA; NYENRODE BUSINESS UNIVERSITY, BREUKELEN, NETHERLANDS; AALBORG UNIVERSITY, BUSINESS SCH, AALBORG, DENMARK;	BLOCKCHAIN; ACCOUNTING; MACHINE LEARNING;	10.1108/AAAJ-10-2020-4991	REVIEW	SUPPLY-CHAIN; ARTIFICIAL-INTELLIGENCE; TECHNOLOGY; MANAGEMENT; INFORMATION; ACCOUNTABILITY; INNOVATION; ADOPTION; SCIENCE	ACCOUNT AUDIT ACCOUN	ACCOUNT. AUDIT ACCOUNT.	ENGLISH	EMERALD GROUP PUBLISHING LTD	2022	GARANINA, T (CORRESPONDING AUTHOR), UNIV VAASA, SCH ACCOUNTING & FINANCE, VAASA, FINLAND.	0951-3574	ACCOUNTING AUDITING & ACCOUNTABILITY JOURNAL	25	BLOCKCHAIN IN ACCOUNTING RESEARCH CURRENT TRENDS AND EMERGING TOPICS	35	ISI	UNIVERSITY OF VAASA; MACQUARIE UNIVERSITY; NYENRODE BUSINESS UNIVERSITY; AALBORG UNIVERSITY	UNIV VAASA	#N/A	GARANINA T, 2022, ACCOUNT AUDIT ACCOUN	GARANINA T, 2022, ACCOUNT AUDIT ACCOUN
GARCÍA-MONLEÓN F, 2023, J INNOV KNOWL	GARCÍA-MONLEÓN F; ERDMANN A; ARILLA R	GARCIA-MONLEON, FERNANDO; ERDMANN, ANETT; ARILLA, RAMON	ABBASI G, 2021, PLOS ONE, V16, DOI 10.1371/JOURNAL.PONE.0247582; AHN J, 2018, INT J HOSP MANAG, V74, P109, DOI 10.1016/J.IJHM.2018.02.020; AL SHEHHI A, 2014, IN C IND ENG ENG MAN, P1443, DOI 10.1109/IEEM.2014.7058877; ALBAYATI H, 2020, TECHNOL SOC, V62, DOI 10.1016/J.TECHSOC.2020.101320; ALHARBI A, 2021, IEEE ACCESS, V9, P21388, DOI 10.1109/ACCESS.2021.3055785; ALSHAMSI A, 2019, INT J HUM-COMPUT …	THE USE OF CRYPTOCURRENCIES OFFERS ATTRACTIVE BUSINESS OPPORTUNITIES, IN THE CONTEXT OF FINANCIAL SERVICES, SMART CONTRACTS AND TOKEN-BASED BUSINESS MODELS. THE OBJECTIVE OF THIS STUDY IS TO PROVIDE A VALUE-BASED UNDERSTANDING OF WHAT DRIVES PEOPLE TO USE CRYPTOCURRENCIES FOR VALUE EXCHANGE. BASED ON THE USERS' PERCEIVED VALUE OF THE TECHNOLOGY, AS LOGIC OF DECISION MAKING, WE EXPLORE THE ROLE OF…	#N/A	#N/A	ESIC UNIVERSITY, DEPT ECON & FINANCE, CAM VALDENIGRIALES S-N, MADRID 28223, SPAIN; ESIC UNIVERSITY, DEPT MKT, CAM VALDENIGRIALES S-N, MADRID 28223, SPAIN; ESIC UNIVERSITY, DEPT MARKET RES & QUANTITAT METHODS, CAM VALDENIGRIALES S-N, MADRID 28223, SPAIN; ESIC BUSINESS & MKT SCHOOL, AV JUAN XXIII 12, MADRID 28224, SPAIN;	CRYPTOCURRENCY; BLOCKCHAIN; PERCEIVED VALUE; TECHNOLOGY; SUSTAINABLE INVESTMENT	10.1016/j.jik.2023.100342	ARTICLE	PLS-SEM; INFORMATION-TECHNOLOGY; BLOCKCHAIN TECHNOLOGY; USER ACCEPTANCE; BITCOIN; READINESS	J INNOV KNOWL	J. INNOV. KNOWL.	ENGLISH	ELSEVIER ESPANA	2023	GARCÍA-MONLEÓN, F (CORRESPONDING AUTHOR), ESIC UNIV, DEPT ECON & FINANCE, CAM VALDENIGRIALES S-N, MADRID 28223, SPAIN.	2530-7614	JOURNAL OF INNOVATION & KNOWLEDGE	9	A VALUEBASED APPROACH TO THE ADOPTION OF CRYPTOCURRENCIES	8	ISI	ESIC; ESIC UNIVERSITY; ESIC; ESIC UNIVERSITY; ESIC; ESIC UNIVERSITY; ESIC; ESIC BUSINESS AND MARKETING SCHOOL	ESIC UNIV	#N/A	GARCÍA-MONLEÓN F, 2023, J INNOV KNOWL	GARCÍA-MONLEÓN F, 2023, J INNOV KNOWL
GIETZMANN M, 2021, J ACCOUNT PUBLIC POL	GIETZMANN M; GROSSETTI F	GIETZMANN, MILES; GROSSETTI, FRANCESCO	ABADIE A, 2005, REV ECON STUD, V72, P1, DOI 10.1111/0034-6527.00321; ANONYMOUS, 1992, PRICE QUALITY TRUST; ARAL S, 2013, INFORM SYST RES, V24, P3, DOI 10.1287/ISRE.1120.0470; AUNG M, 2014, FOOD CONTROL, V39, P172, DOI 10.1016/J.FOODCONT.2013.11.007; BLIDHOLM G, 2018, ADOPTION DISTRIBUTED; BOGNER A, 2016, ACM INTERNATIONAL CONFERENCE PROCEEDING SERIES, V07-09-NOVE, P177, DOI 10.1145/2991561.299846…	IN A RECENT SURVEY OF ACADEMIC RESEARCH, FINTECH RELATED TOPICS, BROADLY CLASSIFIED AS CRYPTO-CURRENCY STUDIES, WERE BY FAR THE MOST RESEARCHED TOPICS IN THE SOCIAL SCIENCES. HOWEVER, WE HAVE OBSERVED THAT, PERHAPS SURPRISINGLY, EVEN THOUGH CRYPTO-CURRENCIES RELY ON A DISTRIBUTED ACCOUNTING LEDGER TECHNOLOGY, RELATIVELY FEW OF THOSE STUDIES WERE CONDUCTED BY ACCOUNTING ACADEMICS. WHILE SOME OF TH…	#N/A	#N/A	BOCCONI UNIVERSITY, DEPT ACCOUNTING, VIA RONTGEN 1, I-20136 MILAN, ITALY; BOCCONI UNIVERSITY, BOCCONI INST DATA SCI & ANALYT BIDSA, VIA RONTGEN 1, I-20136 MILAN, ITALY;	BLOCKCHAIN; DISTRIBUTED LEDGER TECHNOLOGY; REGULATORY COMPLIANCE; SMART CONTRACT; ASSET PROVENANCE	10.1016/j.jaccpubpol.2021.106881	ARTICLE	FAST-FOOD INDUSTRY; SUPPLY CHAIN; RESEARCH FRAMEWORK; MINIMUM-WAGES; NEW-JERSEY; INVESTMENTS; EMPLOYMENT; MANAGEMENT; CONTRACTS; IMPACT	J ACCOUNT PUBLIC POL	J. ACCOUNT. PUBLIC POLICY	ENGLISH	ELSEVIER SCIENCE INC	2021	GIETZMANN, M (CORRESPONDING AUTHOR), BOCCONI UNIV, DEPT ACCOUNTING, VIA RONTGEN 1, I-20136 MILAN, ITALY.	0278-4254	JOURNAL OF ACCOUNTING AND PUBLIC POLICY	9	BLOCKCHAIN AND OTHER DISTRIBUTED LEDGER TECHNOLOGIES WHERE IS THE ACCOUNTING	40	ISI	BOCCONI UNIVERSITY; BOCCONI UNIVERSITY	BOCCONI UNIV	#N/A	GIETZMANN M, 2021, J ACCOUNT PUBLIC POL	GIETZMANN M, 2021, J ACCOUNT PUBLIC POL
GOMAA AA, 2019, J EMERG TECHNOL ACCO	GOMAA A; GOMAA M; STAMPONE A	GOMAA, AHMED A.; GOMAA, MOHAMED, I; STAMPONE, ASHLEY	ANONYMOUS, 2016, BLOCKCHAIN TECHNOLOG; ANONYMOUS, 2016, WHAT'S NEXT FOR BLOCKCHAIN IN 2016?; ASSOCIATION TO ADVANCE COLLEGIATE SCHOOLS OF BUSINESS (AACSB), 2018, EL PROC ACCR STAND A; BIBLE W, 2017, AUDIT ASSURANCE ALER; DAI J, 2017, J INF SYST, V31, P5, DOI 10.2308/ISYS-51804; GOMAA A, 2018, OPERATIONS MANAGEMEN, V12; INTERNAL REVENUE SERVICE (IRS), 2014, NOTICE 2014-21; NAKAMOTO S, 2008, BITCOI…	THIS CASE PROMOTES DISCUSSIONS ABOUT BLOCKCHAIN TECHNOLOGY. IT SHOWS A TRANSACTION EXECUTION SCENARIO AND ITS TAX IMPLICATIONS. THE CASE PROVIDES (1) AN OVERVIEW OF THE STEPS REQUIRED TO INSTALL A DIGITAL WALLET; (2) AN EXPLANATION OF THE NEED TO ADD CRYPTOCURRENCIES TO THE WALLET IN ORDER TO TRANSACT ON THE BLOCKCHAIN; (3) AN OVERVIEW OF EXECUTING A TRANSACTION, IN WHICH AN ACCOUNTING CONSULTING…	#N/A	#N/A	UNIVERSITY SCRANTON, SCRANTON, PA 18510, USA; CALIF STATE POLYTECH UNIVERSITY POMONA, POMONA, CA 91768, USA;	CRYPTOCURRENCY; BLOCKCHAIN; ACCOUNTING INFORMATION SYSTEMS; IRS	10.2308/jeta-52412	ARTICLE	#N/A	J EMERG TECHNOL ACCO	J. EMERG. TECHNOL. ACCOUNT.	ENGLISH	AMER ACCOUNTING ASSOC	2019	GOMAA, AA (CORRESPONDING AUTHOR), UNIV SCRANTON, SCRANTON, PA 18510 USA.	1554-1908	JOURNAL OF EMERGING TECHNOLOGIES IN ACCOUNTING	15	A TRANSACTION ON THE BLOCKCHAIN AN AIS PERSPECTIVE INTRO CASE TO EXPLAIN TRANSACTIONS ON THE ERP AND THE ROLE OF THE INTERNAL AND EXTERNAL AUDITOR	16	ISI	UNIVERSITY OF SCRANTON; CALIFORNIA STATE UNIVERSITY SYSTEM; CALIFORNIA STATE POLYTECHNIC UNIVERSITY POMONA	UNIV SCRANTON	#N/A	GOMAA AA, 2019, J EMERG TECHNOL ACCO	GOMAA AA, 2019, J EMERG TECHNOL ACCO
GURDGIEV C, 2021, INNOVATIONS IN SOC FINANCE: TRANSITIONING BEYOND ECON VALUE	GURDGIEV C; FLEMING A	GURDGIEV CONSTANTIN; FLEMING ADAM	none	CRYPTO-ASSETS AND BLOCKCHAIN TECHNOLOGIES HOLD THE PROMISE OF PROVIDING MORE SECURE SYSTEMS FOR MANAGING PUBLIC AND PRIVATE DATA, ENHANCING PUBLIC TRUST IN DATA COLLECTION, AND INCREASING THE EFFICIENCY OF SOCIAL IMPACT FINANCE TRANSACTIONS. HOWEVER, TO DATE, BLOCKCHAIN TECHNOLOGIES HAVE STRUGGLED TO DELIVER ON THESE PROMISES. SPECIFICALLY, CYBERSECURITY THREATS TO BLOCKCHAIN TECHNOLOGIES ARE ACC…	#N/A	978-303072535-8; 978-303072534-1	UNIVERSITY OF NORTHERN COLORADO, COLLEGE OF PROFESSIONAL STUDIES, MONFORT COLLEGE OF BUSINESS, GREELEY, CO, USA; UNIVERSITY OF DUBLIN, TRINITY BUSINESS SCHOOL, TRINITY COLLEGE DUBLIN, DUBLIN, IRELAND; UNIVERSITY OF DUBLIN, TRINITY COLLEGE DUBLIN ,DUBLIN, IRELAND;	BLOCKCHAIN; CRYPTOCURRENCY; CYBERSECURITY; IMPACT FINANCE; RISK	10.1007/978-3-030-72535-8_16	BOOK CHAPTER	#N/A	INNOVATIONS IN SOC FINANCE: TRANSITIONING BEYOND ECON VALUE	INNOVATIONS IN SOC. FINANCE: TRANSITIONING BEYOND ECON. VALUE	ENGLISH	SPRINGER INTERNATIONAL PUBLISHING	2021	C. GURDGIEV; COLLEGE OF PROFESSIONAL STUDIES, MONFORT COLLEGE OF BUSINESS, UNIVERSITY OF NORTHERN COLORADO, GREELEY, UNITED STATES; EMAIL: GURDGIC@TCD.IE	#N/A	INNOVATIONS IN SOCIAL FINANCE: TRANSITIONING BEYOND ECONOMIC VALUE	1	INFORMATIONAL EFFICIENCY AND CYBERSECURITY SYSTEMIC THREATS TO BLOCKCHAIN APPLICATIONS	#N/A	ISI	UNIVERSITY OF NORTHERN COLORADO;UNIVERSITY OF DUBLIN;UNIVERSITY OF DUBLIN	NOTREPORTED;UNIVERSITY OF NORTHERN COLORADO;NOTREPORTED	#N/A	GURDGIEV C, 2021, INNOVATIONS IN SOC FINANCE: TRANSITIONING BEYOND ECON VALUE	GURDGIEV C, 2021, INNOVATIONS IN SOC FINANCE: TRANSITIONING BEYOND ECON VALUE
HAMPL F, 2021, AUST ACCOUNT REV	HAMPL F; GYÖNYÖROVÁ L	HAMPL, FILIP; GYONYOROVA, LUCIE	ADRIAN T, 2019, FINTECH NOTES RISE D; AMMOUS S, 2018, Q REV ECON FINANC, V70, P38, DOI 10.1016/J.QREF.2018.05.010; ANONYMOUS, 2018, CONCEPTUAL FRAMEWORK; ANONYMOUS, 2003, J RISK FINANC, DOI DOI 10.1108/EB022958; ANTE L, 2020, INFLUENCE STABLECOIN; BARNES J, 2018, INT GAAP 2018 GENERA; BAUR D, 2021, FINANC RES LETT, P38; BAUR D, 2018, ECON LETT, V173, P148, DOI 10.1016/J.ECONLET.2018.10.008; BAUR …	STABLECOINS ARE A RAPIDLY EVOLVING SUBCATEGORY OF CRYPTOCURRENCY THAT AIM TO REDUCE THE PRICE FLUCTUATIONS OF TRADITIONAL CRYPTOCURRENCIES AND THUS BECOME A COMMON DIGITAL PAYMENT INSTRUMENT. THIS PAPER AIMS TO ASSESS THE MATERIAL SUBSTANCE OF FIAT-BACKED STABLECOINS TO DETERMINE WHETHER FIAT-BACKED STABLECOINS COULD BE CONSIDERED, IN ACCORDANCE WITH IFRS, AS CASH OR CASH EQUIVALENTS. WE CHOSE 11…	#N/A	#N/A	MASARYK UNIVERSITY, DEPT FINANCE, FAC ECON & ADM, BRNO, CZECH REPUBLIC; MASARYK UNIVERSITY, DEPT LAW, FAC ECON & ADM, BRNO, CZECH REPUBLIC;	STABLECOIN; CRYPTOCURRENCY; FIAT MONEY; IFRS	10.1111/auar.12344	ARTICLE	BITCOIN; VOLATILITY; GOLD	AUST ACCOUNT REV	AUST. ACCOUNT. REV.	ENGLISH	WILEY	2021	HAMPL, F (CORRESPONDING AUTHOR), MASARYK UNIV, DEPT FINANCE, FAC ECON & ADM, BRNO, CZECH REPUBLIC.; HAMPL, F (CORRESPONDING AUTHOR), MASARYK UNIV, DEPT LAW, FAC ECON & ADM, BRNO, CZECH REPUBLIC.	1035-6908	AUSTRALIAN ACCOUNTING REVIEW	7	CAN FIATBACKED STABLECOINS BE CONSIDERED CASH OR CASH EQUIVALENTS UNDER INTERNATIONAL FINANCIAL REPORTING STANDARDS RULES	31	ISI	MASARYK UNIVERSITY BRNO; MASARYK UNIVERSITY BRNO	MASARYK UNIV;MASARYK UNIV	#N/A	HAMPL F, 2021, AUST ACCOUNT REV	HAMPL F, 2021, AUST ACCOUNT REV
HAN HD, 2023, INT J ACCOUNT INF SY	HAN H; SHIWAKOTI R; JARVIS R; MORDI C; BOTCHIE D	HAN, HONGDAN; SHIWAKOTI, RADHA K.; JARVIS, ROBIN; MORDI, CHIMA; BOTCHIE, DAVID	ALLES M, 2020, INT J ACCOUNT INF SY, V38, DOI 10.1016/J.ACCINF.2020.100465; ANGELIS J, 2019, BUS HORIZONS, V62, P307, DOI 10.1016/J.BUSHOR.2018.12.001; ANONYMOUS, 2016, HARVARD BUS REV; ANONYMOUS, 2016, FUTURE FINANCIAL INF; ANONYMOUS, 2016, INT BUSINESS TIMES; ANONYMOUS, 2016, BLOCKCHAIN TECHNOLOGY: A GAME-CHANGER IN ACCOUNTING? AVAILABLE AT; ANONYMOUS, 2018, BLOCKCHAIN AND THE FUTURE OF ACCOUNT…	THIS PAPER SURVEYS THE PUBLISHED WORK ON HOW BLOCKCHAIN TECHNOLOGY WILL IMPACT ACCOUNTING IN GENERAL, BUT AI-ENABLED AUDITING SPECIFICALLY. THE PURPOSE IS TO INVESTIGATE HOW BLOCKCHAIN TECHNOLOGY CAN IMPROVE TRANSPARENCY AND TRUST IN ACCOUNTING PRACTICE AND HOW PROFESSIONALS CAN USE BLOCKCHAIN DATA TO IMPROVE DECISION-MAKING, BASED ON THE QUALITIES OF IMMUTABILITY, APPEND -ONLY, SHARED, VERIFIED,…	#N/A	#N/A	BRUNEL UNIVERSITY LONDON, BRUNEL BUSINESS SCH, LONDON UB8 3PH, UNITED KINGDOM;	ACCOUNTING; AUDITING; ARTIFICIAL INTELLIGENCE; BLOCKCHAIN	10.1016/j.accinf.2022.100598	REVIEW	DIGITAL TRANSFORMATION; SPECIAL SECTION; SUPPLY CHAIN; BIG DATA; INFORMATION; GOVERNANCE; DISRUPTION; ADOPTION; BITCOIN; AUTOMATION	INT J ACCOUNT INF SY	INT. J. ACCOUNT. INF. SYST.	ENGLISH	ELSEVIER	2023	HAN, HD (CORRESPONDING AUTHOR), BRUNEL UNIV LONDON, BRUNEL BUSINESS SCH, LONDON UB8 3PH, ENGLAND.	1467-0895	INTERNATIONAL JOURNAL OF ACCOUNTING INFORMATION SYSTEMS	43	ACCOUNTING AND AUDITING WITH BLOCKCHAIN TECHNOLOGY AND ARTIFICIAL INTELLIGENCE A LITERATURE REVIEW	48	ISI	BRUNEL UNIVERSITY	BRUNEL UNIV LONDON	#N/A	HAN HD, 2023, INT J ACCOUNT INF SY	HAN HD, 2023, INT J ACCOUNT INF SY
HANDOKO BL, 2022, PROCEEDINGS OF THE 6TH INTERNATIONAL CONFERENCE ON E-COMMERCE, E-BUSINESS AND E-GOVERNMENT, ICEEG 2022	HANDOKO B; GUNAWAN B; DJATI M	HANDOKO, BAMBANG LEO; GUNAWAN, BRYAN AURELIO; DJATI, MUHAMMAD FIKRI PERMANA	AHAMAD S, 2013, INTERNATIONAL CONFERENCE ON ADVANCES IN COMPUTER SCIENCE, P42; AHMAD A, 2019, IEEE ICC; GIL-ALANA L, 2020, RES INT BUS FINANC, V51, DOI 10.1016/J.RIBAF.2019.101063; ASSOCIATION OF CHARTERED CERTIFIED ACCOUNTANTS (ACCA), ACC CRYPT; BONSÓN E, 2019, MEDITARI ACCOUNT RES, V27, P725, DOI 10.1108/MEDAR-11-2018-0406; BRENDER N, 2018, THE POTENTIAL IMPACT OF BLOCKCHAIN TECHNOLOGY ON AUDIT…	THE DEVELOPMENT OF TECHNOLOGY HAS BEEN GROWING RAPIDLY IN THE CURRENT STATE OF TIME. WITH THAT BEING SAID, BLOCKCHAIN IS ONE OF THE IMPORTANT PILLARS THAT IS CURRENTLY REVOLUTIONIZING THE TRADITIONAL WAY OF LIFE. IT IS A NEW SYSTEM THAT BRINGS NOT ONLY MORE EFFICIENCY, BUT ALSO MORE CHALLENGES TO BE FACED AS WELL TO MANY FIELDS, INCLUDING ACCOUNTING AND AUDIT AS ONE OF THEM. OUR RESEARCH IS GOING…	#N/A	978-1-4503-9652-3	BINA NUSANTARA UNIVERSITY, FAC ECON & COMMUN, ACCOUNTING DEPT, JAKARTA 11480, INDONESIA;	BLOCKCHAIN; CRYPTOCURRENCY; BIG FOUR	10.1145/3537693.3537718	PROCEEDINGS PAPER	INTEGRATION; SERVICES	PROCEEDINGS OF THE 6TH INTERNATIONAL CONFERENCE ON E-COMMERCE, E-BUSINESS AND E-GOVERNMENT, ICEEG 2022	#N/A	ENGLISH	ASSOC COMPUTING MACHINERY	2022	HANDOKO, BL (CORRESPONDING AUTHOR), BINA NUSANTARA UNIV, FAC ECON & COMMUN, ACCOUNTING DEPT, JAKARTA 11480, INDONESIA.	#N/A	PROCEEDINGS OF THE 6TH INTERNATIONAL CONFERENCE ON E-COMMERCE, E-BUSINESS AND E-GOVERNMENT, ICEEG 2022	0	IMPORTANCE OF BLOCKCHAIN WITHIN THE BIG 4 CPA FIRMS CRYPTOCURRENCYS EXISTENCE	#N/A	ISI	UNIVERSITAS BINA NUSANTARA	BINA NUSANTARA UNIV	#N/A	HANDOKO BL, 2022, PROCEEDINGS OF THE 6TH INTERNATIONAL CONFERENCE ON E-COMMERCE, E-BUSINESS AND E-GOVERNMENT, ICEEG 2022	HANDOKO BL, 2022, PROCEEDINGS OF THE 6TH INTERNATIONAL CONFERENCE ON E-COMMERCE, E-BUSINESS AND E-GOVERNMENT, ICEEG 2022
HARRAST SA, 2022, CURR ISS AUDIT	HARRAST S; MCGILSKY D; SUN Y	HARRAST, STEVEN A.; MCGILSKY, DEBRA; SUN, YAN (TRICIA)	AICPA, 2020, ACCOUNT AUDIT ACCOUN; ANONYMOUS, 2021, DELOITTE; BLOOMBERG, 2018, FORTUNE 0131; BONNER SE, 1990, ACCOUNT REV, V65, P72; CHARTERED PROFESSIONAL ACCOUNTANTS CANADA (CPAC), 2018, AUD CONS REL CRYPT A; CLAYTON JAY, 2017, STATEMENT ON CRYPTOCURRENCIES AND INITIAL COIN OFFERINGS; ERB K, 2019, COMMUNICATION 0626; FAZIO R, 1978, J PERS, V46, P228, DOI 10.1111/J.1467-6494.1978.TB00177.X; HOPK…	CRYPTOCURRENCIES POSE SEVERAL RISKS THAT IMPACT THE INHERENT RISK ASSESSMENTS OF AUDITORS. THE SEC HAS ISSUED WARNINGS ABOUT THE RISKS (CLAYTON 2017), AND THE PCAOB LISTS VIRTUAL ASSETS AS A KEY FOCUS AREA IN FUTURE INSPECTIONS (VINCENT AND WILKINS 2020). THIS STUDY EXAMINES HOW ACCOUNTING PROFESSIONALS PERCEIVE THE INHERENT RISKS ASSOCIATED WITH CRYPTOCURRENCY BASED ON THEIR LIKELIHOOD OF OCCURR…	#N/A	#N/A	CENT MICHIGAN UNIVERSITY, COLL BUSINESS ADM, DEPT ACCOUNTING, MT PLEASANT, MI 48859, USA;	CRYPTOCURRENCY; RISK; INHERENT RISK; EXCHANGE RISK; CRYPTOCURRENCY RISK JUDGMENTS; ACCOUNTING; EXCHANGE	10.2308/CIIA-2020-038	ARTICLE	EXPERIENCE	CURR ISS AUDIT	CURR. ISS. AUDIT.	ENGLISH	AMER ACCOUNTING ASSOC	2022	HARRAST, SA (CORRESPONDING AUTHOR), CENT MICHIGAN UNIV, COLL BUSINESS ADM, DEPT ACCOUNTING, MT PLEASANT, MI 48859 USA.	1936-1270	CURRENT ISSUES IN AUDITING	3	DETERMINING THE INHERENT RISKS OF CRYPTOCURRENCY A SURVEY ANALYSIS	16	ISI	CENTRAL MICHIGAN UNIVERSITY	CENT MICHIGAN UNIV	#N/A	HARRAST SA, 2022, CURR ISS AUDIT	HARRAST SA, 2022, CURR ISS AUDIT
HAZAR HB, 2020, EURAS STUD BUS ECON	HAZAR H	HAZAR, HULYA BOYDAS	BERG C, 2018, BLOCKCHAIN EC BEGINN; CAMBRIDGE DICTIONARY, 2019, ENCYCL BRITANNICA; CATALINI C., 2017, 2874598 MIT SLOAN; DELOITTE, 2018, BLOCKCHAIN TECHNOLOG; DIMITRI N, 2017, 201703 MAASTR SCH MA; FLEDER M, 2015, ARXIV, DOI ARXIV:1502.01657; HOON DE, 2018, CAN TAXMAN IDENTIFY; ICAEW IT FACULTY, 2017, BLOCKCH FUT ACC; MARIAN O, 2013, MICHIGAN LAW REVIEW FIRST IMPRESSIONS, V112, P38; MEIKLEJOHN S,…	CRYPTOCURRENCIES ARE DEFINED AS ANONYMOUS DIGITAL CURRENCIES. IT IS WIDELY ASSUMED THAT THE REAL-WORLD IDENTITIES OF THE PERSONS WHO ENGAGE IN CRYPTOCURRENCY TRANSACTIONS ARE SECRET AND WILL REMAIN SECRET. DIGITAL SIGNATURES SERVE AS IDENTITIES OF THE PARTIES INVOLVED IN CRYPTOCURRENCY TRANSACTIONS. THEY ARE ESSENTIALLY COMPOSED OF A PAIR OF KEYS, THE SECRET KEY AND THE PUBLIC KEY, WHICH ARE USED…	BILGIN, MH DANIS, H DEMIR, E	978-3-030-53536-0; 978-3-030-53535-3	ISTANBUL AYDIN UNIVERSITY, DEPT BUSINESS ADM, ISTANBUL, TURKEY;	CRYPTOCURRENCY; BLOCKCHAIN; BITCOIN; ALTCOINS; ANONYMITY; PSEUDONYMITY	10.1007/978-3-030-53536-0_12	PROCEEDINGS PAPER	#N/A	EURAS STUD BUS ECON	#N/A	ENGLISH	SPRINGER INTERNATIONAL PUBLISHING AG	2020	HAZAR, HB (CORRESPONDING AUTHOR), ISTANBUL AYDIN UNIV, DEPT BUSINESS ADM, ISTANBUL, TURKEY.	2364-5067	EURASIAN ECONOMIC PERSPECTIVES	3	ANONYMITY IN CRYPTOCURRENCIES	14	ISI	ISTANBUL AYDIN UNIVERSITY	ISTANBUL AYDIN UNIV	#N/A	HAZAR HB, 2020, EURAS STUD BUS ECON	HAZAR HB, 2020, EURAS STUD BUS ECON
HOLUB M, 2018, INF SOC	HOLUB M; JOHNSON J	HOLUB MARK; JOHNSON JACKIE	none	OVER THE LAST FEW YEARS, RESEARCH ON BITCOIN AND OTHER CRYPTOCURRENCIES HAS SNOWBALLED ACROSS MANY DISCIPLINES: TECHNICAL FIELDS, ECONOMICS, LAW, PUBLIC POLICY, FINANCE, ACCOUNTING, AND OTHERS. AS THE USES OF BLOCKCHAIN TECHNOLOGY BEHIND BITCOIN EXPAND, MORE DISCIPLINES WILL BE DRAWN TO ITS STUDY AND THE RESEARCH WILL GREATLY EXPAND. THIS PAPER PROVIDES AN ASSESSMENT OF THE CURRENT STATE OF THE L…	#N/A	#N/A	UNIVERSITY OF WESTERN AUSTRALIA, BUSINESS SCHOOL, CRAWLEY, AUSTRALIA; INDEPENDENT RESEARCHER, PERTH, AUSTRALIA;	BITCOIN; BLOCKCHAIN; CRYPTOCURRENCY; DIGITAL CURRENCY;	10.1080/01972243.2017.1414094	ARTICLE	#N/A	INF SOC	INF. SOC.	ENGLISH	ROUTLEDGE	2018	M. HOLUB; BUSINESS SCHOOL, UNIVERSITY OF WESTERN AUSTRALIA, CRAWLEY, 35 STIRLING HIGHWAY, 6009, AUSTRALIA; EMAIL: MARK.HOLUB@UWA.EDU.AU	01972243	INFORMATION SOCIETY	75	BITCOIN RESEARCH ACROSS DISCIPLINES	34	ISI	UNIVERSITY OF WESTERN AUSTRALIA;INDEPENDENT RESEARCHER	NOTREPORTED;UNIVERSITY OF WESTERN AUSTRALIA;NOTREPORTED	#N/A	HOLUB M, 2018, INF SOC	HOLUB M, 2018, INF SOC
HUANG RH, 2023, COMPUT LAW SECUR REV	HUANG R; DENG H; CHAN A	HUANG ROBIN HUI; DENG HUI; CHAN AIDEN FOON LOK	none	THIS ARTICLE TAKES AN INTERDISCIPLINARY APPROACH TO EXAMINING THE LEGAL NATURE OF CRYPTOCURRENCY AS PROPERTY AND ITS ACCOUNTING AND TAXATION IMPLICATIONS FOR COMPANIES HOLDING CRYPTOCURRENCIES. NOWADAYS AN INCREASING NUMBER OF COMPANIES ACCEPT CRYPTOCURRENCIES AS PAYMENT AND INVESTMENT METHODS, BUT IT IS STILL UNCLEAR HOW TO CLASSIFY THEM AS PROPERTY, WHICH RESULTS IN UNCERTAINTIES RELATING TO TH…	#N/A	#N/A	THE CHINESE UNIVERSITY OF HONG KONG SAR, CHAIR PROFESSOR, FACULTY OF LAW, HONG KONG; JIANGXI UNIVERSITY OF FINANCE AND ECONOMICS, PROFESSOR, CHINA; THE CHINESE UNIVERSITY OF HONG KONG SAR, FACULTY OF LAW, HONG KONG;	ACCOUNTING; CRYPTOCURRENCY; PROPERTY; TAXATION; VALUATION	10.1016/j.clsr.2023.105860	ARTICLE	ELECTRONIC MONEY; ACCOUNTING TREATMENT; CONTRACTUAL ARRANGEMENTS; FINANCIAL STATEMENTS; INTANGIBLE ASSETS; LEGAL PROVISIONS; LEGAL STATUS; PROPERTY; UNCERTAINTY; UNIQUE FEATURES; VALUATION; TAXATION	COMPUT LAW SECUR REV	COMPUT LAW SECUR. REV.	ENGLISH	ELSEVIER LTD	2023	H. DENG; PROFESSOR, JIANGXI UNIVERSITY OF FINANCE AND ECONOMICS, CHINA; EMAIL: SCHOLAR1818@163.COM	02673649	COMPUTER LAW AND SECURITY REVIEW	1	THE LEGAL NATURE OF CRYPTOCURRENCY AS PROPERTY ACCOUNTING AND TAXATION IMPLICATIONS	51	ISI	THE CHINESE UNIVERSITY OF HONG KONG SAR;JIANGXI UNIVERSITY OF FINANCE AND ECONOMICS;THE CHINESE UNIVERSITY OF HONG KONG SAR	NOTREPORTED;JIANGXI UNIVERSITY OF FINANCE AND ECONOMICS;NOTDECLARED	#N/A	HUANG RH, 2023, COMPUT LAW SECUR REV	HUANG RH, 2023, COMPUT LAW SECUR REV
HUBBARD B, 2023, ACCOUNT RES J	HUBBARD B	HUBBARD, BENJAMIN	AICPA, 2022, ACC AUD DIG ASS; AJAYI F, 2022, AFR. J. ACCOUNT. FIN. RES., V5, P32; ALOOSH A, 2022, DIRECT EVIDENCE OF BITCOIN WASH TRADING; ANDRIANTO Y, 2018, JOURNAL OF FINANCE AND ACCOUNTING, V5, P229, DOI DOI 10.11648/J.JFA.20170506, DOI 10.11648/J.JFA.20170506.14; BAKAR N, 2017, INTERNATIONAL JOURNAL OF ADVANCED ENGINEERING RESEARCH AND SCIENCE, P130, DOI DOI 10.22161/IJAERS.4.11.20; BORRI N, …	PURPOSETHE PURPOSE OF THIS PAPER IS TO EXAMINE POTENTIAL FINANCIAL ACCOUNTING TREATMENTS FOR CRYPTOCURRENCIES, INCLUDING THE CURRENT GUIDANCE, AND COMPARE THE BENEFITS AND SHORTCOMINGS OF EACH METHOD. IT PROPOSES THE INTRODUCTION AND USE OF AN INTANGIBLE ASSET REVALUATION MODEL. THE STUDY AIMS TO INFORM BOTH STANDARD SETTERS AND FINANCIAL STATEMENT PREPARERS OF THE MOST APPROPRIATE ACCOUNTING TRE…	#N/A	#N/A	PURDUE UNIVERSITY, KRANNERT SCH MANAGEMENT, W LAFAYETTE, IN 47907, USA;	FASB; DIGITAL ASSETS; CRYPTO	10.1108/ARJ-10-2022-0279	REVIEW; EARLY ACCESS	#N/A	ACCOUNT RES J	ACCOUNT. RES. J.	ENGLISH	EMERALD GROUP PUBLISHING LTD	2023	HUBBARD, B (CORRESPONDING AUTHOR), PURDUE UNIV, KRANNERT SCH MANAGEMENT, W LAFAYETTE, IN 47907 USA.	1030-9616	ACCOUNTING RESEARCH JOURNAL	1	DECRYPTING CRYPTO IMPLICATIONS OF POTENTIAL FINANCIAL ACCOUNTING TREATMENTS OF CRYPTOCURRENCY	#N/A	ISI	PURDUE UNIVERSITY SYSTEM; PURDUE UNIVERSITY	PURDUE UNIV	#N/A	HUBBARD B, 2023, ACCOUNT RES J	HUBBARD B, 2023, ACCOUNT RES J
ILHAM RN, 2019, INT J SUPPLY CHAIN MANAG	ILHAM R; ERLINA E; FACHRUDIN K; SILALAHI A; SAPUTRA J; ALBRA W	ILHAM RICO NUR; ERLINA; FACHRUDIN KHAIRAH AMALIA; SILALAHI AMLYS SYAHPUTRA; SAPUTRA JUMADIL; ALBRA WAHYUDDIN	none	AS A CONSENSUS NETWORK, BITCOIN ENABLES NEW PAYMENT SYSTEMS AND MONEY THAT ARE ENTIRELY DIGITAL OR CAN BE INTERPRETED AS A VIRTUAL CURRENCY THAT USES OPEN SOURCE USER-TO-PEER NETWORK SYSTEMS FOR PURCHASING AND SOURCING MANAGEMENT. IT OFFERS EASIER WAY OF PAYMENT WITHOUT THE NEED FOR A BANK ACCOUNT, CREDIT CARD OR INTERMEDIARY. BITCOIN IS CASH STORED IN A COMPUTER THAT CAN BE USED TO REPLACE CASH …	#N/A	#N/A	UNIVERSITAS SUMATERA UTARA, FACULTY OF ECONOMICS AND BUSINESS, MEDAN, SUMATERA, 20155, INDONESIA; UNIVERSITI MALAYSIA TERENGGANU, SCHOOL OF SOCIAL AND ECONOMIC DEVELOPMENT, TERENGGANU, MALAYSIA; UNIVERSITAS MALIKUSSALEH, FACULTY OF ECONOMICS AND BUSINESS, LHOKSEUMAWE, ACEH, 24351, INDONESIA;	BITCOIN; PURCHASING MANAGEMENT; TAXATION; VIRTUAL PAYMENT INSTRUMENTS	#N/A	ARTICLE	#N/A	INT J SUPPLY CHAIN MANAG	INT. J. SUPPLY CHAIN MANAG.	ENGLISH	EXCELINGTECH	2019	J. SAPUTRA; SCHOOL OF SOCIAL AND ECONOMIC DEVELOPMENT, UNIVERSITI MALAYSIA TERENGGANU, TERENGGANU, MALAYSIA; EMAIL: JUMADIL.SAPUTRA@UMT.EDU.MY	20513771	INTERNATIONAL JOURNAL OF SUPPLY CHAIN MANAGEMENT	7	INVESTIGATION OF THE BITCOIN EFFECTS ON THE COUNTRY REVENUES VIA VIRTUAL TAX TRANSACTIONS FOR PURCHASING MANAGEMENT	8	ISI	UNIVERSITAS SUMATERA UTARA;UNIVERSITI MALAYSIA TERENGGANU;UNIVERSITAS MALIKUSSALEH	NOTREPORTED;UNIVERSITI MALAYSIA TERENGGANU;NOTREPORTED	#N/A	ILHAM RN, 2019, INT J SUPPLY CHAIN MANAG	ILHAM RN, 2019, INT J SUPPLY CHAIN MANAG
ILHAM RN, 2019, INT J SUPPLY CHAIN MANAG-a	ILHAM R; ERLINA E; FACHRUDIN K; SILALAHI A; SAPUTRA J	ILHAM RICO NUR; ERLINA; FACHRUDIN KHAIRAH AMALIA; SILALAHI AMLYS SYAHPUTRA; SAPUTRA JUMADIL	none	AS A CONSENSUS NETWORK, BITCOIN ENABLES NEW PAYMENT SYSTEMS AND MONEY THAT ARE ENTIRELY DIGITAL OR CAN BE INTERPRETED AS A VIRTUAL CURRENCY THAT USES OPEN SOURCE USER-TO-PEER NETWORK SYSTEMS. IT OFFERS EASIER WAY OF PAYMENT WITHOUT THE NEED FOR A BANK ACCOUNT, CREDIT CARD OR INTERMEDIARY. BITCOIN IS CASH STORED IN A COMPUTER THAT CAN BE USED TO REPLACE CASH IN AN ONLINE SALE TRANSACTION. THEREFOR…	#N/A	#N/A	UNIVERSITAS SUMATERA UTARA, FACULTY OF ECONOMICS AND BUSINESS, INDONESIA; UNIVERSITI MALAYSIA TERENGGANU, FACULTY OF BUSINESS, ECONOMICS AND SOCIAL DEVELOPMENT, MALAYSIA;	BITCOIN; BLOCKCHAIN; SUPPLY CHAIN; TAXATION; VIRTUAL PAYMENT INSTRUMENTS	#N/A	ARTICLE	#N/A	INT J SUPPLY CHAIN MANAG	INT. J. SUPPLY CHAIN MANAG.	ENGLISH	EXCELINGTECH	2019	J. SAPUTRA; FACULTY OF BUSINESS, ECONOMICS AND SOCIAL DEVELOPMENT, UNIVERSITI MALAYSIA TERENGGANU, MALAYSIA; EMAIL: JUMADIL.SAPUTRA@UMT.EDU.MY	20513771	INTERNATIONAL JOURNAL OF SUPPLY CHAIN MANAGEMENT	10	COMPARATIVE OF THE SUPPLY CHAIN AND BLOCK CHAINS TO INCREASE THE COUNTRY REVENUES VIA VIRTUAL TAX TRANSACTIONS AND REPLACING FUTURE OF MONEY	8	ISI	UNIVERSITAS SUMATERA UTARA;UNIVERSITI MALAYSIA TERENGGANU	NOTREPORTED;UNIVERSITI MALAYSIA TERENGGANU;NOTREPORTED	#N/A	ILHAM RN, 2019, INT J SUPPLY CHAIN MANAG	ILHAM RN, 2019, INT J SUPPLY CHAIN MANAG-a
JACKSON AB, 2023, AUST ACCOUNT REV	JACKSON A; LUU S	JACKSON, ANDREW B.; LUU, STEVEN	ACCA, 2021, ACC CRYPT; ANDERSON C.M., 2022, ACCOUNTING FOR CRYPTOCURRENCIES; ANONYMOUS, 2019, HOLD CRYPT; CAI C, 2018, ACCOUNT FINANC, V58, P965, DOI 10.1111/ACFI.12405; CHOU J, 2022, STUD ECON FINANC, V39, P471, DOI 10.1108/SEF-10-2021-0469; CLEANSPARK, 2020, FORM 10 K; CORBET S, 2018, ECON LETT, V165, P28, DOI 10.1016/J.ECONLET.2018.01.004; DELOITTE U.S., 2021, CORP INV CRYPT; DICKENS RL, 1964,…	RECENT YEARS HAVE SEEN DEVELOPMENTS IN DISTRIBUTED LEDGER TECHNOLOGIES, SUCH AS BLOCKCHAIN, THAT HAVE LED TO SIGNIFICANT GROWTH IN THE NUMBER AND TYPE OF DIGITAL ASSETS AVAILABLE. IN THIS ARTICLE WE REVIEW THE CURRENT PRACTICE OF THE SMALL NUMBER OF FIRMS GLOBALLY REPORTING DIGITAL ASSETS ON THEIR FINANCIAL STATEMENTS. WE THEN ASSESS POTENTIAL TREATMENTS UNDER CURRENT GAAP, NAMELY AS INTANGIBLES,…	#N/A	#N/A	UNSW SYDNEY, SCH ACCOUNTING AUDITING & TAXAT, UNSW BUSINESS SCH, SYDNEY, NSW, AUSTRALIA; UNSW SYDNEY, SYDNEY, NSW, AUSTRALIA; UNSW SYDNEY, SCH ACCOUNTING AUDITING & TAXAT, UNSW BUSINESS SCH, SYDNEY, NSW 2052, AUSTRALIA;	ACCOUNTING; DIGITAL ASSETS; CRYPTOCURRENCY	10.1111/auar.12402	ARTICLE	HOLDING GAINS; FIXED ASSETS; BLOCKCHAIN	AUST ACCOUNT REV	AUST. ACCOUNT. REV.	ENGLISH	WILEY	2023	JACKSON, AB (CORRESPONDING AUTHOR), UNSW SYDNEY, SCH ACCOUNTING AUDITING & TAXAT, UNSW BUSINESS SCH, SYDNEY, NSW 2052, AUSTRALIA.	1035-6908	AUSTRALIAN ACCOUNTING REVIEW	3	ACCOUNTING FOR DIGITAL ASSETS	33	ISI	UNIVERSITY OF NEW SOUTH WALES SYDNEY; UNIVERSITY OF NEW SOUTH WALES SYDNEY; UNIVERSITY OF NEW SOUTH WALES SYDNEY	SCH ACCOUNTING AUDITING AND TAXAT	#N/A	JACKSON AB, 2023, AUST ACCOUNT REV	JACKSON AB, 2023, AUST ACCOUNT REV
JAYASURIYA DD, 2023, ACCOUNT AUDIT ACCOUN	JAYASURIYA D; SIMS A	JAYASURIYA, D. DULANI; SIMS, ALEXANDRA	ADAMS R, 2017, STRATEG CHANG, V26, P417, DOI 10.1002/JSC.2141; ADHAMI S, 2018, J ECON BUS, V100, P64, DOI 10.1016/J.JECONBUS.2018.04.001; ALARCON J, 2018, PENNSYLVANIA CPA J, V88, P3; ALI O, 2020, INT J INFORM MANAGE, V54, DOI 10.1016/J.IJINFOMGT.2020.102199; ALLES M, 2015, ACCOUNT HORIZ, V29, P439, DOI 10.2308/ACCH-51067; ALLISON I, 2015, INT BUSINESS TIMES; ANDERSEN N, 2016, BLOCKCHAIN TECHNOLO…	PURPOSE THIS STUDY CONDUCTS A SYSTEMATIC REVIEW USING 452 ACADEMIC AND INDUSTRY ARTICLES FROM AN INITIAL SET OF 60,899 RECORDS OBTAINED BY 3 DATABASES FROM 2012 TO 2020. THE AUTHORS COMPARE AND CONTRAST BLOCKCHAINS WITH EXISTING LEGACY SYSTEMS. THE AUTHORS IDENTIFY EXISTING REGULATION, ACCOUNTING STANDARDS, GUIDELINES AND POTENTIAL AMENDMENTS IN UNDER-EXPLORED AREAS SUCH AS TAXATION, ACCOUNTING T…	#N/A	#N/A	UNIVERSITY AUCKLAND, DEPT ACCOUNTING & FINANCE, CITY CAMPUS, AUCKLAND, NEW ZEALAND; UNIVERSITY AUCKLAND, DEPT COMMERCIAL LAW, CITY CAMPUS, AUCKLAND, NEW ZEALAND;	BLOCKCHAIN; DISRUPTIVE TECHNOLOGY; ACCOUNTING; GOVERNANCE; AUDITING; SMART CONTRACT	10.1108/AAAJ-08-2020-4718	REVIEW	TECHNOLOGY; CHALLENGES; BITCOIN	ACCOUNT AUDIT ACCOUN	ACCOUNT. AUDIT ACCOUNT.	ENGLISH	EMERALD GROUP PUBLISHING LTD	2023	JAYASURIYA, DD (CORRESPONDING AUTHOR), UNIV AUCKLAND, DEPT ACCOUNTING & FINANCE, CITY CAMPUS, AUCKLAND, NEW ZEALAND.	0951-3574	ACCOUNTING AUDITING & ACCOUNTABILITY JOURNAL	10	FROM THE ABACUS TO ENTERPRISE RESOURCE PLANNING IS BLOCKCHAIN THE NEXT BIG ACCOUNTING TOOL	36	ISI	UNIVERSITY OF AUCKLAND; UNIVERSITY OF AUCKLAND	UNIV AUCKLAND	#N/A	JAYASURIYA DD, 2023, ACCOUNT AUDIT ACCOUN	JAYASURIYA DD, 2023, ACCOUNT AUDIT ACCOUN
JUMDE A, 2020, INT J BUS PERFORM MA	JUMDE A; CHO B	JUMDE, AVANEESH; CHO, BOO YUN	AMMOUS S, 2018, Q REV ECON FINANC, V70, P38, DOI 10.1016/J.QREF.2018.05.010; BRENNAN J, 2018, BANKING FINANCIAL SE, V37, P8; NGUYEN T, 2018, INT J BUSINESS EC PE, V13, P106; RAB H, 2010, HUMANOMICS, V26, P36, DOI 10.1108/08288661011024986; REKETTYE G, 2018, INT J BUS PERFORM MA, V19, P158, DOI 10.1504/IJBPM.2018.10010263; SCHOETTLE A, 2018, INDIANAPOLIS BUSINES, V39, P20; YERMACK D, 2018, 1 NBER,…	SINCE THE AWAKENING OF BITCOIN, THE TERMS 'BLOCKCHAIN', 'CRYPTOCURRENCIES' HAVE BECOME THE BUZZ WORDS. CRYPTOCURRENCIES WERE THOUGHT TO BE VERY PROMISING AND BOOMED FEVEROUSLY IN THE HOPE THAT IT MIGHT BE CAPABLE OF REPLACING THE TRADITIONAL CURRENCY. ON THIS BACKGROUND, THE PAPER HAS FOLLOWING OBJECTIVES: 1) TO COMPARE THE FIAT MONEY WITH CRYPTOCURRENCY; 2) TO STUDY THE POTENTIAL OF CRYPTOCURREN…	#N/A	#N/A	HIGHER COLLEGE TECHNOL, DUBAI WOMENS CAMPUS, DUBAI 16062, UNITED ARAB EMIRATES; JEJU NATIONAL UNIVERSITY, 102 JEJUDAEHAK RO, JEJU SI 63243, JEJU SPECIAL SE, SOUTH KOREA;	CRYPTOCURRENCY; FIAT MONEY; DIGITAL CURRENCY; TRADITIONAL MONEY; BLOCKCHAIN; MEDIUM OF EXCHANGE; STORE OF VALUE; UNIT OF ACCOUNT; FUNCTIONS OF MONEY; ANALYTIC HIERARCHY PROCESS	#N/A	ARTICLE	#N/A	INT J BUS PERFORM MA	INT. J. BUS. PERFORM. MANAG.	ENGLISH	INDERSCIENCE ENTERPRISES LTD	2020	CHO, BY (CORRESPONDING AUTHOR), HIGHER COLL TECHNOL, DUBAI WOMENS CAMPUS, DUBAI 16062, U ARAB EMIRATES.; CHO, BY (CORRESPONDING AUTHOR), JEJU NATL UNIV, 102 JEJUDAEHAK RO, JEJU SI 63243, JEJU SPECIAL SE, SOUTH KOREA.	1368-4892	INTERNATIONAL JOURNAL OF BUSINESS PERFORMANCE MANAGEMENT	6	CAN CRYPTOCURRENCIES OVERTAKE THE FIAT MONEY	21	ISI	HIGHER COLLEGES OF TECHNOLOGY; JEJU NATIONAL UNIVERSITY	HIGHER COLL TECHNOL;JEJU NATL UNIV	#N/A	JUMDE A, 2020, INT J BUS PERFORM MA	JUMDE A, 2020, INT J BUS PERFORM MA
JUSKAITE L, 2022, BUS MANAG ECON ENG	JUSKAITE L; GUDELYTE-ZILINSKIENE L	JUSKAITE, LINA; GUDELYTE-ZILINSKIENE, LAURA	ANDRIANTO Y, 2018, JOURNAL OF FINANCE AND ACCOUNTING, V5, P229, DOI DOI 10.11648/J.JFA.20170506, DOI 10.11648/J.JFA.20170506.14; ANKENBRAND T, 2018, INVEST. MANAG. FINANC. INNOVAT., V15, P169, DOI DOI 10.21511/IMFI.15(3).2018.14; BERENTSEN A, 2018, FED RESERVE BANK ST, V100, P1, DOI 10.20955/R.2018.1-16; BILEVICIENE T, 2011, STATISTINIU METODU T; BINDA J, 2020, INVESTMENT MAN AGEME, V17, P227, DO…	PURPOSE - THE MAIN AIM OF THIS ARTICLE IS TO IDENTIFY CRYPTOCURRENCIES SUITABLE FOR INVESTMENT AND PORTFOLIO DIVERSIFICATION. RESEARCH METHODOLOGY - THE METHODOLOGY OF EMPIRICAL RESEARCH INCLUDES METHODS OF SCIENTIFIC LITERATURE ANALYSIS, STATISTICAL DATA ANALYSIS, MULTICRITERIA EVALUATION, CORRELATION ANALYSIS. FINDINGS - BITCOIN IS THE LEADING CRYPTOCURRENCY, BUT THIS RESULT COULD HAVE BEEN DUE…	#N/A	#N/A	VILNIUS GEDIMINAS TECH UNIVERSITY, FAC BUSINESS MANAGEMENT, DEPT FINANCIAL ENGN, SAULETEKIO AL 11, LT-10223 VILNIUS, LITHUANIA;	DIVERSIFICATION; CRYPTOCURRENCY; INVESTMENT; TRADITIONAL ASSETS	10.3846/bmee.2022.16883	ARTICLE	#N/A	BUS MANAG ECON ENG	BUS. MANAG. ECON. ENG.	ENGLISH	VILNIUS GEDIMINAS TECH UNIV	2022	GUDELYTE-ZILINSKIENE, L (CORRESPONDING AUTHOR), VILNIUS GEDIMINAS TECH UNIV, FAC BUSINESS MANAGEMENT, DEPT FINANCIAL ENGN, SAULETEKIO AL 11, LT-10223 VILNIUS, LITHUANIA.	2669-2481	BUSINESS MANAGEMENT AND ECONOMICS ENGINEERING	4	INVESTIGATION OF THE FEASIBILITY OF INCLUDING DIFFERENT CRYPTOCURRENCIES IN THE INVESTMENT PORTFOLIO FOR ITS DIVERSIFICATION	20	ISI	VILNIUS GEDIMINAS TECHNICAL UNIVERSITY	VILNIUS GEDIMINAS TECH UNIV	#N/A	JUSKAITE L, 2022, BUS MANAG ECON ENG	JUSKAITE L, 2022, BUS MANAG ECON ENG
KADEN SR, 2021, ISS ACCOUNT EDUC	KADEN S; LINGWALL J; SHONHIWA T	KADEN, STACEY R.; LINGWALL, JEFF W.; SHONHIWA, TREVOR T.	AACSB, 2018, EL PROC ACCR STAND A; AMERICAN ACCOUNTING ASSOCIATION, 2018, 2018 BLOCKCH TECHN E; ANDERSEN N, 2016, BLOCKCHAIN TECHNOLOGY: A GAME-CHANGER IN ACCOUNTING?; ANONYMOUS, 2018, BLOCKCHAIN AND THE FUTURE OF ACCOUNTANCY; APPELBAUM D, 2018, CPA J; BORNELUS B, 2019, ANN ADFSL C DIG FOR; COINBASE, 2018, RIS CRYPT HIGH ED; DAI J, 2017, J INF SYST, V31, P5, DOI 10.2308/ISYS-51804;DELOITTE, 2016,…	THIS PAPER PRESENTS THE MOTIVATION, LEARNING EXPERIENCES, AND PRACTICAL CONCERNS REGARDING IMPLEMENTING A CODE-BASED METHOD TO TEACH BLOCKCHAIN TECHNOLOGY TO ACCOUNTING STUDENTS. WITH 53 PERCENT OF COMPANIES REPORTING BLOCKCHAIN AS A CRITICAL PRIORITY FOR THEIR ORGANIZATION, ACCOUNTANTS' WORK WILL BE IMPACTED (DELOITTE 2019). YET, MOST BLOCKCHAIN EDUCATION FOR ACCOUNTANTS APPEARS TO BE LIMITED TO…	#N/A	#N/A	TRUMAN STATE UNIVERSITY, SCH BUSINESS, KIRKSVILLE, MO 63501, USA; BOISE STATE UNIVERSITY, COLL BUSINESS & ECON, BOISE, ID 83725, USA;	BLOCKCHAIN; ACCOUNTING EDUCATION; FACULTY DEVELOPMENT	10.2308/ISSUES-19-080	ARTICLE	#N/A	ISS ACCOUNT EDUC	ISS. ACCOUNT. EDUC.	ENGLISH	AMER ACCOUNTING ASSOC	2021	KADEN, SR (CORRESPONDING AUTHOR), TRUMAN STATE UNIV, SCH BUSINESS, KIRKSVILLE, MO 63501 USA.	0739-3172	ISSUES IN ACCOUNTING EDUCATION	2	TEACHING BLOCKCHAIN THROUGH CODING EDUCATING THE FUTURE ACCOUNTING PROFESSIONAL	36	ISI	IDAHO; BOISE STATE UNIVERSITY	TRUMAN STATE UNIV	#N/A	KADEN SR, 2021, ISS ACCOUNT EDUC	KADEN SR, 2021, ISS ACCOUNT EDUC
KAMPAKIS S, 2022, J BRIT BLOCKCHAIN AS	KAMPAKIS S	KAMPAKIS, STYLIANOS	ANONYMOUS, 2021, FRAX FIN AN; ANONYMOUS, ?ABOUT US"; ANONYMOUS, 2014, GAMBL GUID BITC MIN; BANKX, 2022, EC AUD; COINMARKETCAP, ABOUT US; DIXON C., 2017, CRYPTO TOKENS: A BREAKTHROUGH IN OPEN NETWORK DESIGN; HEXOSKIN, ABOUT US; KAMPAKIS D. S., 2018, DATA SCI 0223; KEMPE D., 2005, AUTOMATA, LANGUAGES AND PROGRAMMING. 32ND INTERNATIONAL COLLOQUIUM, ICALP 2005. PROCEEDINGS (LECTURE NOTES IN COMPUTER …	TOKENOMICS IS A VITAL PART OF ANY BLOCKCHAIN PROJECT. IT IS THE STUDY OF HOW CRYPTO TOKENS ARE USED WITHIN THE BLOCKCHAIN ECOSYSTEM, THEIR ROLE IN THE PROJECT, AND HOW THEY ARE DESIGNED TO INCENTIVISE CERTAIN BEHAVIOURS. THERE ARE MANY WAYS THAT CRYPTO TOKENS CAN BE DESIGNED FOR USE WITHIN AN ECOSYSTEM. FOR EXAMPLE, THEY CAN BE DESIGNED TO HAVE A FIXED SUPPLY SO THAT THERE IS NO INFLATION OR DEFL…	#N/A	#N/A	UCL, CTR BLOCKCHAIN TECHNOL, LONDON, UNITED KINGDOM;	TOKENOMICS; BITCOIN; AUDITING; ECOSYSTEM; CRYPTO TOKEN; STRUCTURAL ANALYSIS; MARGINAL CASE	10.31585/jbba-5-2-(1)2022	REVIEW	#N/A	J BRIT BLOCKCHAIN AS	J. BRIT. BLOCKCHAIN ASSOC.	ENGLISH	BRITISH BLOCKCHAIN ASSOC	2022	KAMPAKIS, S (CORRESPONDING AUTHOR), UCL, CTR BLOCKCHAIN TECHNOL, LONDON, ENGLAND.	#N/A	JOURNAL OF THE BRITISH BLOCKCHAIN ASSOCIATION	3	AUDITING TOKENOMICS A CASE STUDY AND LESSONS FROM AUDITING A STABLECOIN PROJECT	5	ISI	UNIVERSITY OF LONDON; UNIVERSITY COLLEGE LONDON	CTR BLOCKCHAIN TECHNOL	#N/A	KAMPAKIS S, 2022, J BRIT BLOCKCHAIN AS	KAMPAKIS S, 2022, J BRIT BLOCKCHAIN AS
KLOPPER N, 2023, J RISK FINANC MANAG	KLOPPER N; BRINK S	KLOPPER NICOLETTE; BRINK SOPHIA MAGARETHA	none	THE INTERNATIONAL FINANCIAL REPORTING STANDARDS (IFRS) DO NOT MAKE EXPLICIT PROVISIONS, IN TERMS OF A SPECIFICALLY DEDICATED STANDARD, FOR THE ACCOUNTING TREATMENT OF CRYPTOCURRENCIES. THIS CREATES UNCERTAINTY, AND GUIDANCE IS THEREFORE REQUIRED IN TERMS OF ACCOUNTING FOR SUCH INVESTMENTS. ACCOUNTING THEORY HAS THE POTENTIAL TO PROVIDE THE FOUNDATION FOR THIS GUIDANCE. THIS STUDY AIMED TO DETERMI…	#N/A	#N/A	STELLENBOSCH UNIVERSITY, SCHOOL OF ACCOUNTANCY, STELLENBOSCH, 7600, SOUTH AFRICA;	ACCOUNTING; CONCEPTUAL FRAMEWORK; CRYPTOCURRENCY; IFRS	10.3390/jrfm16090379	ARTICLE	#N/A	J RISK FINANC MANAG	J. RISK. FINANC. MANAG.	ENGLISH	MULTIDISCIPLINARY DIGITAL PUBLISHING INSTITUTE (MDPI)	2023	N. KLOPPER; SCHOOL OF ACCOUNTANCY, STELLENBOSCH UNIVERSITY, STELLENBOSCH, 7600, SOUTH AFRICA; EMAIL: NKLOPPER@SUN.AC.ZA; S.M. BRINK; SCHOOL OF ACCOUNTANCY, STELLENBOSCH UNIVERSITY, STELLENBOSCH, 7600, SOUTH AFRICA; EMAIL: SOPHIABRINK@SUN.AC.ZA	19118074	JOURNAL OF RISK AND FINANCIAL MANAGEMENT	0	DETERMINING THE APPROPRIATE ACCOUNTING TREATMENT OF CRYPTOCURRENCIES BASED ON ACCOUNTING THEORY	16	ISI	STELLENBOSCH UNIVERSITY	NOTREPORTED;STELLENBOSCH UNIVERSITY;NOTREPORTED;NOTREPORTED;STELLENBOSCH UNIVERSITY;NOTREPORTED	#N/A	KLOPPER N, 2023, J RISK FINANC MANAG	KLOPPER N, 2023, J RISK FINANC MANAG
KOCHERGIN DA, 2020, FIN THEORY PRACT	KOCHERGIN D	KOCHERGIN DMITRII A	none	THE ARTICLE DISCUSSES THE NATURE OF STABLECOINS AND THEIR SPECIFICS IN THE FINANCIAL MARKET. THE AIM OF THE ARTICLE IS TO REVEAL THE ECONOMIC NATURE AND CHARACTERISTICS OF VARIOUS TYPES OF STABLECOINS. THE AUTHOR USED SYSTEM-FUNCTIONAL AND SYSTEM-STRUCTURAL RESEARCH METHODS AS WELL AS METHODS OF STATISTICAL ANALYSIS AND SYNTHESIS. THE PAPER ANALYSES DIFFERENT APPROACHES TO THE INTERPRETATION OF S…	#N/A	#N/A	ST.PETERSBURG STATE UNIVERSITY, DEPARTMENT OF CREDIT THEORY AND FINANCIAL MANAGEMENT, FACULTY OF ECONOMICS, ST. PETERSBURG, RUSSIA;	STABLECOINS; BLOCKCHAIN; COLLATERAL STABLECOINS; CRYPTO ASSETS; CRYPTOCURRENCY; DIGITAL ASSETS; DISTRIBUTED LEDGER TECHNOLOGY; GLOBAL STABLECOINS (GSC); LOCAL STABLECOINS (LSC); VIRTUAL CURRENCIES	10.26794/2587-5671-2020-24-6-140-160	ARTICLE	#N/A	FIN THEORY PRACT	FIN. THEORY PRACT.	ENGLISH	FINANCIAL UNIVERSITY UNDER THE GOVERNMENT OF RUSSIAN FEDERATION	2020	D.A. KOCHERGIN; DEPARTMENT OF CREDIT THEORY AND FINANCIAL MANAGEMENT, FACULTY OF ECONOMICS, ST. PETERSBURG STATE UNIVERSITY, ST. PETERSBURG, RUSSIAN FEDERATION; EMAIL: KDA2001@GMAIL.COM	25875671	FINANCE: THEORY AND PRACTICE	10	ECONOMIC NATURE AND CLASSIFICATION OF STABLECOINS	24	ISI	ST. PETERSBURG STATE UNIVERSITY	NOTREPORTED;ST. PETERSBURG STATE UNIVERSITY;NOTREPORTED	#N/A	KOCHERGIN DA, 2020, FIN THEORY PRACT	KOCHERGIN DA, 2020, FIN THEORY PRACT
KOKER TE, 2020, J RISK FINANC MANAG	KOKER T; KOUTMOS D	KOKER THOMAS E; KOUTMOS DIMITRIOS	none	WE PRESENT A MODEL FOR ACTIVE TRADING BASED ON REINFORCEMENT MACHINE LEARNING AND APPLY THIS TO FIVE MAJOR CRYPTOCURRENCIES IN CIRCULATION. IN RELATION TO A BUY-AND-HOLD APPROACH, WE DEMONSTRATE HOW THIS MODEL YIELDS ENHANCED RISK-ADJUSTED RETURNS AND SERVES TO REDUCE DOWNSIDE RISK. THESE FINDINGS HOLD WHEN ACCOUNTING FOR ACTUAL TRANSACTION COSTS. WE CONCLUDE THAT REAL-WORLD PORTFOLIO MANAGEMENT …	#N/A	#N/A	WORCESTER POLYTECHNIC INSTITUTE, WORCESTER, 01609, MA, USA; TEXAS A&M UNIVERSITY–CORPUS CHRISTI, DEPARTMENT OF ACCOUNTING, FINANCE, AND BUSINESS LAW, COLLEGE OF BUSINESS, CORPUS CHRISTI, 78412, TX, USA;	BITCOIN; CRYPTOCURRENCY; DIRECT REINFORCEMENT; MACHINE LEARNING; RISK	10.3390/jrfm13080178	ARTICLE	#N/A	J RISK FINANC MANAG	J. RISK. FINANC. MANAG.	ENGLISH	MULTIDISCIPLINARY DIGITAL PUBLISHING INSTITUTE (MDPI)	2020	D. KOUTMOS; DEPARTMENT OF ACCOUNTING, FINANCE, AND BUSINESS LAW, COLLEGE OF BUSINESS, TEXAS A&M UNIVERSITY–CORPUS CHRISTI, CORPUS CHRISTI, 78412, UNITED STATES; EMAIL: DIMITRIOS.KOUTMOS@TAMUCC.EDU	19118074	JOURNAL OF RISK AND FINANCIAL MANAGEMENT	26	CRYPTOCURRENCY TRADING USING MACHINE LEARNING	13	ISI	WORCESTER POLYTECHNIC INSTITUTE;TEXAS AANDM UNIVERSITY–CORPUS CHRISTI	NOTREPORTED;TEXAS AANDM UNIVERSITY–CORPUS CHRISTI;NOTREPORTED	#N/A	KOKER TE, 2020, J RISK FINANC MANAG	KOKER TE, 2020, J RISK FINANC MANAG
KOKINA J, 2017, J EMERG TECHNOL ACCO	KOKINA J; MANCHA R; PACHAMANOVA D	KOKINA, JULIA; MANCHA, RUBEN; PACHAMANOVA, DESSISLAVA	ACCOUNTING BLOCKCHAIN COALITION CONFERENCE (ABCC), 2017, BLOCKCH ACC AUD TEX; ACCOUNTINGBLOCKCHAIN, 2017, BLOCKCH ACC AUD TAX; AMERICAN INSTITUTE OF CERTIFIED PUBLIC ACCOUNTANTS (AICPA), 2017, BLOCKCH LEG EM STAT; ANONYMOUS, 2016, BLOCKCH TECHN GAM CH; ANONYMOUS, 2016, BLOCKCHAIN SHARING E; ASSURANCE SERVICES EXECUTIVE COMMITTEE (ASEC), 2017, AB THE COMM; BARAN P, 1964, IEEE T COMMUN SYST, VCS12,…	BLOCKCHAIN IS A DISTRIBUTED LEDGER TECHNOLOGY POISED TO TRANSFORM THE ACCOUNTING PRACTICE. IN THIS PAPER, WE PROVIDE AN INITIAL EXAMINATION OF THE TECHNOLOGY ITSELF AND DISCUSS THE ASSOCIATED OPPORTUNITIES AND LIMITATIONS. WE ALSO PRESENT AN OVERVIEW OF THE CURRENT BLOCKCHAIN-RELATED PRACTICES IN LARGE ACCOUNTING FIRMS AND TRACE SIGNIFICANT MILESTONES IN THIS TECHNOLOGY'S EMERGENCE. FINALLY, WE D…	#N/A	#N/A	BABSON COLLEGE, BABSON PK, MA 02157, USA;	BLOCKCHAIN; DISTRIBUTED LEDGER TECHNOLOGY; SMART CONTRACT; ACCOUNTING	10.2308/jeta-51911	ARTICLE	#N/A	J EMERG TECHNOL ACCO	J. EMERG. TECHNOL. ACCOUNT.	ENGLISH	AMER ACCOUNTING ASSOC	2017	KOKINA, J (CORRESPONDING AUTHOR), BABSON COLL, BABSON PK, MA 02157 USA.	1554-1908	JOURNAL OF EMERGING TECHNOLOGIES IN ACCOUNTING	134	BLOCKCHAIN EMERGENT INDUSTRY ADOPTION AND IMPLICATIONS FOR ACCOUNTING	14	ISI	BABSON COLLEGE	BABSON COLL	#N/A	KOKINA J, 2017, J EMERG TECHNOL ACCO	KOKINA J, 2017, J EMERG TECHNOL ACCO
KOLKOVÁ A, 2018, PROCEEDINGS OF THE 6TH INTERNATIONAL CONFERENCE INNOVATION MANAGEMENT, ENTREPRENEURSHIP AND SUSTAINABILITY (IMES 2018)	KOLKOVÁ A	KOLKOVA, ANDREA	ANONYMOUS, LEGAL STATUS BITCOIN; ANONYMOUS, HIST DATA CRYPTOCURR; ANONYMOUS, BITSTAMP WINS BEST V; ANONYMOUS, 8 INT SCI C MAN MOD; BARIVIERA AF, 2017, PHYSICA A, V484, P82, DOI 10.1016/J.PHYSA.2017.04.159; EYAL I, 2017, COMPUTER, V50, P38, DOI 10.1109/MC.2017.3571042; HILEMAN G, 2017, J EC LIT; LARIOS-HERNÁNDEZ G, 2017, BUS HORIZONS, V60, P865, DOI 10.1016/J.BUSHOR.2017.07.012; KATSIAMPA P, 2017,…	PURPOSE: THE AIM OF THIS PAPER IS TO SHOW THE POTENTIAL USE AND POSSIBILITIES OF CRYPTOCURRENCIES FOR ENTERPRISES. THIS INCLUDES THE ACCOUNTING AND LEGAL ASPECTS OF THIS NEW PHENOMENON. THE APPLICATION WILL FOCUS ON ONE OF THE WAYS TO EXPLOIT CRYPTOCURRENCIES, NAMELY CFD CONTRACTS. DESIGN/METHODOLOGY/APPROACH: THE ARTICLE DESCRIBES THE CAPABILITIES AND TOOLS FOR USING CRYPTOCURRENCY FOR ENTREPREN…	DVOULETY, O LUKES, M MISAR, J	978-80-245-2274-6	VSB TU OSTRAVA, EKON FAK, SOKOLSKA TR 33, OSTRAVA 70200 1, CZECH REPUBLIC;	CRYPTOCURRENCY; BITCOIN; ETHEREUM; LITECOIN	#N/A	PROCEEDINGS PAPER	BITCOIN	PROCEEDINGS OF THE 6TH INTERNATIONAL CONFERENCE INNOVATION MANAGEMENT, ENTREPRENEURSHIP AND SUSTAINABILITY (IMES 2018)	#N/A	ENGLISH	OECONOMICA PUBLISHING HOUSE	2018	KOLKOVÁ, A (CORRESPONDING AUTHOR), VSB TU OSTRAVA, EKON FAK, SOKOLSKA TR 33, OSTRAVA 70200 1, CZECH REPUBLIC.	#N/A	PROCEEDINGS OF THE 6TH INTERNATIONAL CONFERENCE INNOVATION MANAGEMENT, ENTREPRENEURSHIP AND SUSTAINABILITY (IMES 2018)	0	THE USE OF CRYPTOCURRENCY IN ENTERPRISES IN CZECH REPUBLIC	#N/A	ISI	TECHNICAL UNIVERSITY OF OSTRAVA	A (CORRESPONDING AUTHOR)	#N/A	KOLKOVÁ A, 2018, PROCEEDINGS OF THE 6TH INTERNATIONAL CONFERENCE INNOVATION MANAGEMENT, ENTREPRENEURSHIP AND SUSTAINABILITY (IMES 2018)	KOLKOVÁ A, 2018, PROCEEDINGS OF THE 6TH INTERNATIONAL CONFERENCE INNOVATION MANAGEMENT, ENTREPRENEURSHIP AND SUSTAINABILITY (IMES 2018)
LEE LS, 2022, J EMERG TECHNOL ACCO	LEE L; APPELBAUM D; MAUTZ R	LEE, LORRAINE S.; APPELBAUM, DENIZ; MAUTZ III, RICHARD D.	ANONYMOUS, 2016, BLOCKCHAIN TECHNOLOGY: A GAME-CHANGER IN ACCOUNTING? AVAILABLE AT; APPELBAUM D, 2020, J INF SYST, V34, P5, DOI 10.2308/ISYS-52660; BADUA F, 2011, ACCOUNTING ED J, V21, P89; BALL D, 2008, JOURNAL OF INFORMATION SYSTEMS EDUCATION, V19, P431; BELIN O, 2020, DIFFERENCE BLOCKCHAI; BOULIANNE E, 2016, CAN J ADM SCI, V33, P304, DOI 10.1002/CJAS.1405; BOYCE G, 2001, ACCOUNT EDUC, V10, P37…	ORGANIZATIONS SUCH AS THE AACSB AND THE PATHWAYS COMMISSION (2012) RECOMMEND THAT ACCOUNTING CURRICULA INCLUDE EMERGING TECHNOLOGIES. YET INCLUDING EMERGING TECHNOLOGIES REPRESENTS A CHALLENGE FOR ACCOUNTING EDUCATORS DUE TO THE COMPLEXITY AND UNCERTAINTY ASSOCIATED WITH SUCH TECHNOLOGIES, AS WELL AS THE RAPID PACE OF TECHNOLOGY CHANGE AND INNOVATION. THIS PAPER ANSWERS THE CALL BY THE PATHWAYS C…	#N/A	#N/A	UNIVERSITY NORTH CAROLINA WILMINGTON, CAMERON SCH BUSINESS, DEPT ACCOUNTANCY & BUSINESS LAW, WILMINGTON, NC 28403, USA; MONTCLAIR STATE UNIVERSITY, FELICIANO SCH BUSINESS, DEPT ACCOUNTING & FINANCE, MONTCLAIR, NJ, USA; UNIVERSITY SOUTH FLORIDA, MUMA COLL BUSINESS, LYNN PIPPENGER SCH ACCOUNTANCY, TAMPA, FL, USA;	BLOCKCHAIN; ACCOUNTING EDUCATION; EMERGING TECHNOLOGIES	10.2308/JETA-2020-009	ARTICLE; PROCEEDINGS PAPER	INFORMATION-TECHNOLOGY	J EMERG TECHNOL ACCO	J. EMERG. TECHNOL. ACCOUNT.	ENGLISH	AMER ACCOUNTING ASSOC	2022	LEE, LS (CORRESPONDING AUTHOR), UNIV NORTH CAROLINA WILMINGTON, CAMERON SCH BUSINESS, DEPT ACCOUNTANCY & BUSINESS LAW, WILMINGTON, NC 28403 USA.	1554-1908	JOURNAL OF EMERGING TECHNOLOGIES IN ACCOUNTING	0	BLOCKCHAINS AN EXPERIENTIAL ACCOUNTING LEARNING ACTIVITY	19	ISI	UNIVERSITY OF NORTH CAROLINA; UNIVERSITY OF NORTH CAROLINA WILMINGTON; MONTCLAIR STATE UNIVERSITY; STATE UNIVERSITY SYSTEM OF FLORIDA; UNIVERSITY OF SOUTH FLORIDA	UNIV NORTH CAROLINA WILMINGTON	#N/A	LEE LS, 2022, J EMERG TECHNOL ACCO	LEE LS, 2022, J EMERG TECHNOL ACCO
LOMBARDI R, 2022, ACCOUNT AUDIT ACCOUN	LOMBARDI R; DE V C; MOSCARIELLO N; PIZZO M	LOMBARDI, ROSA; DE VILLIERS, CHARL; MOSCARIELLO, NICOLA; PIZZO, MICHELE	ADAMS R, 2017, STRATEG CHANG, V26, P417, DOI 10.1002/JSC.2141; ALI O, 2020, INT J INFORM MANAGE, V54, DOI 10.1016/J.IJINFOMGT.2020.102199; ALKHUDARY R, 2020, EUR BUS REV, V32, P765, DOI 10.1108/EBR-11-2019-0297; ALLES M, 2020, INT J ACCOUNT INF SY, V38, DOI 10.1016/J.ACCINF.2020.100465; ALVESSON M, 2000, DOING CRITICAL MANAG; ARMITAGE A, 2008, 7TH EUROPEAN CONFERENCE ON RESEARCH METHODOLOGY FOR B…	PURPOSE THIS PAPER PRESENTS A SYSTEMATIC LITERATURE REVIEW, INCLUDING CONTENT AND BIBLIOMETRIC ANALYSES, OF THE IMPACT OF BLOCKCHAIN TECHNOLOGY (BT) IN AUDITING, TO IDENTIFY TRENDS, RESEARCH AREAS AND CONSTRUCT AN AGENDA FOR FUTURE RESEARCH. DESIGN/METHODOLOGY/APPROACH THE AUTHORS INCLUDE STUDIES FROM 2010 TO 2020 IN THEIR STRUCTURED LITERATURE REVIEW (SLR), USING ACCOUNTING JOURNALS ON THE SCOPU…	#N/A	#N/A	UNIVERSITY ROMA LA SAPIENZA, ROME, ITALY; UNIVERSITY AUCKLAND, AUCKLAND, NEW ZEALAND; UNIVERSITY PRETORIA, PRETORIA, SOUTH AFRICA; UNIVERSITY CAMPANIA L VANVITELLI, CAPUA, ITALY;	BLOCKCHAIN; AUDITING; ACCOUNTING; DISTRIBUTED LEDGER TECHNOLOGY; SMART CONTRACT; CRYPTOCURRENCY; ICO; TOKEN	10.1108/AAAJ-10-2020-4992	REVIEW	INTERDISCIPLINARY ACCOUNTING RESEARCH; REFLECTIONS; PROJECTIONS; METHODOLOGY; INFORMATION; DECADE; IMPACT	ACCOUNT AUDIT ACCOUN	ACCOUNT. AUDIT ACCOUNT.	ENGLISH	EMERALD GROUP PUBLISHING LTD	2022	LOMBARDI, R (CORRESPONDING AUTHOR), UNIV ROMA LA SAPIENZA, ROME, ITALY.	0951-3574	ACCOUNTING AUDITING & ACCOUNTABILITY JOURNAL	30	THE DISRUPTION OF BLOCKCHAIN IN AUDITING A SYSTEMATIC LITERATURE REVIEW AND AN AGENDA FOR FUTURE RESEARCH	35	ISI	SAPIENZA UNIVERSITY ROME; UNIVERSITY OF AUCKLAND; UNIVERSITY OF PRETORIA; UNIVERSITA DELLA CAMPANIA VANVITELLI	UNIV ROMA LA SAPIENZA	#N/A	LOMBARDI R, 2022, ACCOUNT AUDIT ACCOUN	LOMBARDI R, 2022, ACCOUNT AUDIT ACCOUN
LUO M, 2022, REV ACCOUNT STUD	LUO M; YU S	LUO, MEI; YU, SHUANGCHEN	AICPA, 2020, ACCOUNT AUDIT ACCOUN; ANONYMOUS, 2018, BITMAIN FINANCIAL ST; ANONYMOUS, 2018, CONC FRAM FIN REP; BIAIS B, 2019, REV FINANC STUD, V32, P1662, DOI 10.1093/RFS/HHY095; BOURVEAU T, 2022, J ACCOUNT RES, V60, P129, DOI 10.1111/1475-679X.12404; CAO S, 2019, FINANCIAL REPORTING; CHIU J, 2019, REV FINANC STUD, V32, P1716, DOI 10.1093/RFS/HHY122; CONG L, 2022, TAX LOSS HARVESTING, DOI 10.2139/…	THIS STUDY COMPARES AND CONTRASTS US AND INTERNATIONAL ACCOUNTING AND FINANCIAL REPORTING PRACTICES FOR CRYPTOCURRENCY. WE ANALYZE THE FINANCIAL STATEMENTS OF 40 GLOBAL COMPANIES THAT HAVE EXPOSURE TO CRYPTOCURRENCIES, INCLUDING CRYPTOCURRENCY PURCHASES, MINING, PAYMENTS, TRADING, AND INVESTMENTS IN ICOS AND EARLY-STAGE BLOCKCHAIN VENTURES. WE DOCUMENT INCONSISTENCY BETWEEN GENERALLY ACCEPTED ACC…	#N/A	#N/A	TSINGHUA UNIVERSITY, SCH ECON & MANAGEMENT, BEIJING, CHINA;	CRYPTOCURRENCY; BLOCKCHAIN; FINANCIAL REPORTING; ACCOUNTING	10.1007/s11142-022-09741-w	ARTICLE; EARLY ACCESS	BLOCKCHAIN	REV ACCOUNT STUD	REV. ACCOUNT. STUD.	ENGLISH	SPRINGER	2022	LUO, M (CORRESPONDING AUTHOR), TSINGHUA UNIV, SCH ECON & MANAGEMENT, BEIJING, PEOPLES R CHINA.	1380-6653	REVIEW OF ACCOUNTING STUDIES	4	FINANCIAL REPORTING FOR CRYPTOCURRENCY	#N/A	ISI	TSINGHUA UNIVERSITY	TSINGHUA UNIV	#N/A	LUO M, 2022, REV ACCOUNT STUD	LUO M, 2022, REV ACCOUNT STUD
MAFFEI M, 2021, J ORGAN CHANGE MANAG	MAFFEI M; CASCIELLO R; MEUCCI F	MAFFEI, MARCO; CASCIELLO, RAFFAELA; MEUCCI, FIORENZA	ABREU PW, 2018, IBER CONF INF SYST; ALARCON J, 2018, PENNSYLVANIA CPA J, V88, P3; ANONYMOUS, 2017, ISACA J; ANONYMOUS, ISA 200; ANONYMOUS, 2017, DIVIDED WE FALL DISTRIBUTED WE STAND. THE PROFESSIONAL ACCOUNTANT'S GUIDE TO DISTRIBUTED LEDGERS AND BLOCKCHAIN; ANONYMOUS, 2018, PWC'S GLOBAL BLOCKCHAIN SURVEY 2018; ANONYMOUS, 2016, WHATS NEXT BLOCKCHAI; ANONYMOUS, 2018, BREAKING BLOCKCHAIN OPEN DELOIT…	PURPOSE THE AIM OF THIS PAPER IS TO EXPLORE THE EFFECTS OF ADOPTING AND IMPLEMENTING BLOCKCHAIN TECHNOLOGY (BT) IN ACCOUNTING AND AUDITING PRACTICES IN TERMS OF BENEFITS AND THREATS, THUS DISCOVERING NEW AND UPCOMING RISKS AND ISSUES. DESIGN/METHODOLOGY/APPROACH THIS PAPER ADOPTS A CRITICAL PERSPECTIVE TO INVESTIGATE HOW THE IMPLEMENTATION OF BT COULD AFFECT ACCOUNTING AND AUDITING PRACTICES, PRO…	#N/A	#N/A	UNIVERSITY NAPLES FEDERICO II, DEPT ECON MANAGEMENT INST, NAPLES, ITALY;	BLOCKCHAIN; ACCOUNTING; AUDITING; EMERGING ISSUES; RISK	10.1108/JOCM-09-2020-0264	ARTICLE	INFORMATION; FRAMEWORK; SECURITY; LEDGERS; BITCOIN	J ORGAN CHANGE MANAG	J. ORGAN. CHANG. MANAGE.	ENGLISH	EMERALD GROUP PUBLISHING LTD	2021	MEUCCI, F (CORRESPONDING AUTHOR), UNIV NAPLES FEDERICO II, DEPT ECON MANAGEMENT INST, NAPLES, ITALY.	0953-4814	JOURNAL OF ORGANIZATIONAL CHANGE MANAGEMENT	16	BLOCKCHAIN TECHNOLOGY UNINVESTIGATED ISSUES EMERGING FROM AN INTEGRATED VIEW WITHIN ACCOUNTING AND AUDITING PRACTICES	34	ISI	UNIVERSITY OF NAPLES FEDERICO II	UNIV NAPLES FEDERICO II	#N/A	MAFFEI M, 2021, J ORGAN CHANGE MANAG	MAFFEI M, 2021, J ORGAN CHANGE MANAG
MAKURIN A, 2023, ECON ECOL SOC	MAKURIN A; MALIIENKO A; TRYFONOVA O; MASINA L	MAKURIN, ANDRII; MALIIENKO, ANDRII; TRYFONOVA, OLENA; MASINA, LYUDMYLA	ANDRÉ P, 2018, APPL ECON, V50, P707, DOI 10.1080/00036846.2017.1340570; ARAS S, 2021, KNOWL-BASED SYST, V230, DOI 10.1016/J.KNOSYS.2021.107393; BASHYNSKA I, 2020, MANAGEMENT OF INDUSTRIAL ENTERPRISE'S BUSINESS PROCESSES SMARTIZATION TO ENSURE ITS ECONOMIC SECURITY; BINDA J, 2020, INTERNATIONAL JOURNAL OF MANAGEMENT, V11, P27; GRYSHCHENKO I, 2020, WSEAS TRANSACTIONS ON ENVIRONMENT AND DEVELOPMENT,…	INTRODUCTION. AN ANALYSIS OF APPROACHES TO ACCOUNTING FOR TRANSACTIONS WITH CRYPTOCURRENCY STATES THAT THE DEVELOPMENT OF DIGITAL TECHNOLOGIES AND VIRTUAL MARKETS HAS REVEALED A LACK OF READINESS FOR THE ACCOUNTING DISPLAY OF SUCH ASSETS BECAUSE THERE IS NO SINGLE APPROACH TO ACCOUNTING FOR CRYPTOCURRENCY TRANSACTIONS. VARIOUS REGULATORY DOCUMENTS HAVE PROPOSED CONSIDERING CRYPTOCURRENCY AS AN OB…	#N/A	#N/A	DNIPRO UNIVERSITY TECHNOL, DNIPRO, UKRAINE; ODESA MECHNIKOV NATIONAL UNIVERSITY, ODESA, UKRAINE;	MINING; CRYPTO ASSETS; REVENUE; EXPENSES; ACCOUNTING	10.31520/2616-7107/2023.7.3-3	ARTICLE	#N/A	ECON ECOL SOC	ECON. ECOL. SOC.	ENGLISH	DR. VIKTOR KOVAL	2023	MAKURIN, A (CORRESPONDING AUTHOR), DNIPRO UNIV TECHNOL, DNIPRO, UKRAINE.	2616-7107	ECONOMICS ECOLOGY SOCIUM	0	MANAGEMENT OF CRYPTOCURRENCY TRANSACTIONS FROM ACCOUNTING ASPECTS	7	ISI	MINISTRY OF EDUCATION AND SCIENCE OF UKRAINE; DNIPRO UNIVERSITY OF TECHNOLOGY	DNIPRO UNIV TECHNOL	#N/A	MAKURIN A, 2023, ECON ECOL SOC	MAKURIN A, 2023, ECON ECOL SOC
MAKURIN A, 2023, ECON ECOL SOC-a	MAKURIN A	MAKURIN, ANDRII	ANONYMOUS, 2022, CAMBR BITC EL CONS I; BACK A, 2014, ENABLING BLOCKCHAIN INNOVATIONS WITH PEGGED SIDECHAINS, V72; BURNIE A, 2018, LEDGER-PITTSBURGH, V3, P24, DOI 10.5195/LEDGER.2018.121; DE VRIES A, 2021, RESOUR CONSERV RECY, V175, DOI 10.1016/J.RESCONREC.2021.105901; ERDOGAN S, 2022, ENVIRON SCI POLLUT R, V29, P31723, DOI 10.1007/S11356-021-17998-Y; EUR-LEX, 2009, DIR 2009 110 EC EUR; EUR-LEX, 2…	INTRODUCTION. THE DIGITAL ECONOMY HAS SIGNIFICANTLY CHANGED NOT ONLY THE TYPES, FORMS AND MECHANISM OF PAYMENTS, BUT ALSO THE FORM OF MONEY ITSELF. ELECTRONIC MONEY IS BECOMING MORE POPULAR, WHICH INCREASES THE RELEVANCE AND IMPORTANCE OF THE STUDY OF TECHNICAL ASPECTS AND ENVIRONMENTAL CONSEQUENCES OF MINING ENCRYPTION. THE CHOICE OF EQUIPMENT FOR CRYPTOCURRENCY MINING AND ITS IMPACT ON THE ENVI…	#N/A	#N/A	DNIPRO UNIVERSITY TECHNOL, DEPT INT RELAT & AUDIT, DNIPRO, UKRAINE;	CRYPTOCURRENCY; DIGITAL ASSETS; GREEN MINING; ELECTRONIC MONEY	10.31520/2616-7107/2023.7.1-6	ARTICLE	#N/A	ECON ECOL SOC	ECON. ECOL. SOC.	ENGLISH	DR. VIKTOR KOVAL	2023	MAKURIN, A (CORRESPONDING AUTHOR), DNIPRO UNIV TECHNOL, DEPT INT RELAT & AUDIT, DNIPRO, UKRAINE.	2616-7107	ECONOMICS ECOLOGY SOCIUM	0	TECHNOLOGICAL ASPECTS AND ENVIRONMENTAL CONSEQUENCES OF MINING ENCRYPTION	7	ISI	MINISTRY OF EDUCATION AND SCIENCE OF UKRAINE; DNIPRO UNIVERSITY OF TECHNOLOGY	DNIPRO UNIV TECHNOL	#N/A	MAKURIN A, 2023, ECON ECOL SOC	MAKURIN A, 2023, ECON ECOL SOC-a
MATUSKY T, 2017, INTERNATIONAL SCIENTIFIC CONFERENCE FOR DOCTORAL STUDENTS AND POST-DOCTORAL SCHOLARS (EDAMBA 2017): KNOWLEDGE AND SKILLS FOR SUSTAINABLE DEVELOPMENT: THE ROLE OF ECONOMICS, BUSINESS, MANAGEMENT AND RELATED DISCIPLINES	MATUSKY T	MATUSKY, TOMAS	ANONYMOUS, REG BITC SEL JUR; ANONYMOUS, BITCOINS LEGALITY WO; AUSTRALIAN ACCOUNTING STANDARDS BOARD, 2016, DIG CURR CAS STAND S; BAFIN-VIRTUAL CURRENCY, 2016, FED FIN SUP AUTH; BITCOIN CHARTS, 2017, BITC NETW EC; EUROPEAN CENTRAL BANK, 2012, VIRTUAL CURRENCY SCH, P13; FINANCNI ANALYTICKY UTVAR MINISTERSTVA FINANCI, 2013, MET POK C2 FIN AN UT; G P MICHEL N, 2015, BITS PIECES DIGITAL; LISY J, 2011,…	THE ARTICLE ANALYSES THE LEGAL BASE OF ACCOUNTING OF CRYPTOCURRENCIES AS A NEW PHENOMENON. A CRYPTOCURRENCY IS A VIRTUAL CURRENCY IN THE DIGITAL FORM THAT IS USED AS A MEANS OF PAYMENT OR FOR TRADING. BASED ON AVAILABLE LITERATURE AND STATEMENTS OF REGULATORY AUTHORITIES AROUND THE WORLD WE IDENTIFIED A LACK OF GENERAL REGULATION OF CRYPTOCURRENCIES AS SUCH. THE USAGE OF CRYPTOCURRENCIES IS GENER…	WALLNER, J	978-80-225-4429-0	UNIVERSITY ECON BRATISLAVA, FAC ECON INFORMAT, DOLNOZEMSKA CESTA 1, BRATISLAVA 85235, SLOVAKIA;	CRYPTOCURRENCY; BITCOIN; ACCOUNTING	#N/A	PROCEEDINGS PAPER	#N/A	INTERNATIONAL SCIENTIFIC CONFERENCE FOR DOCTORAL STUDENTS AND POST-DOCTORAL SCHOLARS (EDAMBA 2017): KNOWLEDGE AND SKILLS FOR SUSTAINABLE DEVELOPMENT: THE ROLE OF ECONOMICS, BUSINESS, MANAGEMENT AND RELATED DISCIPLINES	#N/A	ENGLISH	VYDAVATELSTVO EKONOM	2017	MATUSKY, T (CORRESPONDING AUTHOR), UNIV ECON BRATISLAVA, FAC ECON INFORMAT, DOLNOZEMSKA CESTA 1, BRATISLAVA 85235, SLOVAKIA.	#N/A	INTERNATIONAL SCIENTIFIC CONFERENCE FOR DOCTORAL STUDENTS AND POST-DOCTORAL SCHOLARS (EDAMBA 2017): KNOWLEDGE AND SKILLS FOR SUSTAINABLE DEVELOPMENT: THE ROLE OF ECONOMICS, BUSINESS, MANAGEMENT AND RELATED DISCIPLINES	2	ACCOUNTING OF CRYPTOCURRENCIES	#N/A	ISI	UNIVERSITY OF ECONOMICS BRATISLAVA	UNIV ECON BRATISLAVA	#N/A	MATUSKY T, 2017, INTERNATIONAL SCIENTIFIC CONFERENCE FOR DOCTORAL STUDENTS AND POST-DOCTORAL SCHOLARS (EDAMBA 2017): KNOWLEDGE AND SKILLS FOR SUSTAINABLE DEVELOPMENT: THE ROLE OF ECONOMICS, BUSINESS, MANAGEMENT AND RELATED DISCIPLINES	MATUSKY T, 2017, INTERNATIONAL SCIENTIFIC CONFERENCE FOR DOCTORAL STUDENTS AND POST-DOCTORAL SCHOLARS (EDAMBA 2017): KNOWLEDGE AND SKILLS FOR SUSTAINABLE DEVELOPMENT: THE ROLE OF ECONOMICS, BUSINESS, MANAGEMENT AND RELATED DISCIPLINES
MCCALLIG J, 2019, INT J ACCOUNT INF SYST	MCCALLIG J; ROBB A; ROHDE F	MCCALLIG JOHN; ROBB ALASTAIR; ROHDE FIONA	none	THIS PAPER AIMS TO DEVELOP A DESIGN FOR AN ACCOUNTING INFORMATION SYSTEM THAT WILL ENHANCE THE REPRESENTATIONAL FAITHFULNESS OF FINANCIAL REPORTING INFORMATION. ONE OF THE FUNCTIONS OF FINANCIAL REPORTING IS TO AGGREGATE AND REPORT THE ENTITY'S PRIVATE DATA. THIS PAPER SHOWS THAT RECOGNIZING THAT SOME OF THE FIRM'S PRIVATE DATA IS ALREADY SHARED WITH OTHERS ALLOWS THE METHODS OF MULTIPARTY SECURI…	#N/A	#N/A	UNIVERSITY COLLEGE DUBLIN, MICHAEL SMURFIT GRADUATE BUSINESS SCHOOL, IRELAND; THE UNIVERSITY OF QUEENSLAND BUSINESS SCHOOL, AUSTRALIA; THE UNIVERSITY OF QUEENSLAND BUSINESS SCHOOL AND TC BEIRNE SCHOOL OF LAW, AUSTRALIA;	AUDITING; BLOCKCHAIN; DESIGN SCIENCE; FINANCIAL REPORTING; IDENTITY; MULTIPARTY SECURITY; PUBLIC KEY CRYPTOGRAPHY	10.1016/j.accinf.2019.03.004	ARTICLE	#N/A	INT J ACCOUNT INF SYST	INT. J. ACCOUNT. INF. SYST.	ENGLISH	ELSEVIER INC.	2019	J. MCCALLIG; ACCOUNTANCY SUBJECT AREA, UCD LOCHLANN QUINN SCHOOL OF BUSINESS, DUBLIN 4, BELFIELD, D04 V1W8, IRELAND; EMAIL: JOHN.MCCALLIG@UCD.IE	14670895	INTERNATIONAL JOURNAL OF ACCOUNTING INFORMATION SYSTEMS	71	ESTABLISHING THE REPRESENTATIONAL FAITHFULNESS OF FINANCIAL ACCOUNTING INFORMATION USING MULTIPARTY SECURITY NETWORK ANALYSIS AND A BLOCKCHAIN	33	ISI	UNIVERSITY COLLEGE DUBLIN;THE UNIVERSITY OF QUEENSLAND BUSINESS SCHOOL;THE UNIVERSITY OF QUEENSLAND BUSINESS SCHOOL AND TC BEIRNE SCHOOL OF LAW	NOTREPORTED;UCD LOCHLANN QUINN SCHOOL OF BUSINESS;NOTREPORTED	#N/A	MCCALLIG J, 2019, INT J ACCOUNT INF SYST	MCCALLIG J, 2019, INT J ACCOUNT INF SYST
MCGUIGAN N, 2021, ISS ACCOUNT EDUC	MCGUIGAN N; GHIO A; KERN T	MCGUIGAN, NICHOLAS; GHIO, ALESSANDRO; KERN, THOMAS	ALBERS A, 1938, WORK MAT BLACK MOUNT, V5, P6; ALEXANDER J, 2020, SCENARIO PLANNING CO; ANDERSON W, 1983, J ACCOUNTING ED, V1, P5, DOI 10.1016/0748-5751(83)90002-7, DOI 10.1016/0748-5751(83)90002-7; ANONYMOUS, 1990, ISS ACCOUNT EDUC, V5, P307; ANONYMOUS, 2011, CHANGING NATURE VALU; ANONYMOUS, 2000, ISS ACCOUNT EDUC, DOI DOI 10.2308/IACE.2000.15.1.19; ANONYMOUS, 2015, AIRBNB WILL SOON BE; ANONYMOUS…	A MEANS IN WHICH TO FACILITATE A BROADER, INTEGRATED, AND STUDENT-CENTERED EDUCATION IS TO WORK ACROSS DISCIPLINES AND EMBRACE NEW FORMS OF PEDAGOGICAL DESIGN. "DESIGN FUTURING,"A CREATIVE DESIGN METHODOLOGY, STIMULATES THOUGHT, NEGOTIATES FUTURES, AND DEVELOPS CRITICAL THINKING AND COLLABORATIVE COMMUNICATION. THIS LEARNING STRATEGY PAPER DISCUSSES THE INNOVATIVE PROCESS OF DESIGN FUTURING, USIN…	#N/A	#N/A	MONASH UNIVERSITY, MONASH BUSINESS SCH, DEPT ACCOUNTING, CAULFIELD, AUSTRALIA;	ACCOUNTING EDUCATION; CREATIVITY; DESIGN FUTURING; DOUBLE-VARIABLE METHOD; DESIGN THINKING; PEDAGOGICAL DESIGN	10.2308/ISSUES-2019-508	ARTICLE	REALITY	ISS ACCOUNT EDUC	ISS. ACCOUNT. EDUC.	ENGLISH	AMER ACCOUNTING ASSOC	2021	MCGUIGAN, N (CORRESPONDING AUTHOR), MONASH UNIV, MONASH BUSINESS SCH, DEPT ACCOUNTING, CAULFIELD, AUSTRALIA.	0739-3172	ISSUES IN ACCOUNTING EDUCATION	2	DESIGNING ACCOUNTING FUTURES EXPLORING AMBIGUITY IN ACCOUNTING CLASSROOMS THROUGH DESIGN FUTURING	36	ISI	MONASH UNIVERSITY	MONASH UNIV	#N/A	MCGUIGAN N, 2021, ISS ACCOUNT EDUC	MCGUIGAN N, 2021, ISS ACCOUNT EDUC
MOROZOVA T, 2020, ENTREP SUSTAIN ISS	MOROZOVA T; AKHMADEEV R; LEHOUX L; YUMASHEV A; MESHKOVA G; LUKIYANOVA M	MOROZOVA, TATIANA; AKHMADEEV, RAVIL; LEHOUX, LIUBOV; YUMASHEV, ALEXEI; MESHKOVA, GALINA; LUKIYANOVA, MARINA	ADHAMI S, 2018, J ECON BUS, V100, P64, DOI 10.1016/J.JECONBUS.2018.04.001; AKHMETSHIN E, 2015, INT BUSINESS MANAGEM, V9, P895, DOI 10.3923/IBNI.2015.895.902, DOI 10.3923/IBNI.2015.895.902; ALLEN D, 2019, ACCOUNTING FINANCE R, V8, P19; ANONYMOUS, INF SYST FRONT; ASANO T, 2020, ANN OPER RES, V284, P63, DOI 10.1007/S10479-019-03206-1; ASTE T, 2019, DIGIT. FINANC, V1, P5, DOI 10.1007/S42521-019-00008…	GIVEN THE PACE OF DEVELOPMENT OF THE DIGITAL ECONOMY, COMPANIES' OPERATIONS WITH CRYPTO ASSETS ARE AN OBJECTIVE INEVITABILITY FOR MOST STATES. AT THE SAME TIME, NATIONAL JURISDICTIONS NO LONGER HAVE THE OPPORTUNITY TO IGNORE THE FACT OF BUSINESS WORKING WITH CRYPTO ASSETS. MEANWHILE, WITHOUT CONSENSUS IN THE CONSISTENT RESOLUTION OF FINANCIAL, TAX, AND OTHER CROSS-COUNTRY RELATIONS, OPERATIONS WI…	#N/A	#N/A	PRUE, SFREMYANNY LANE 36, MOSCOW 117997, RUSSIA; MIATI GL, CPA, RUE ANDRE DE GARRINI 4, CH-1217 MEYRIN, SWITZERLAND; RLG EUROPE BV, SWISS BRANCH, RUE ANDRE DE GARRINI 4, CH-1217 MEYRIN, SWITZERLAND; SECHENOV FIRST MOSCOW STATE MED UNIV, TRUBETSKAYA ST 8-2, MOSCOW 119991, RUSSIA; BAUMAN MOSCOW STATE TECH UNIVERSITY, 2ND BAUMANSKAYA ST 5,P 1, MOSCOW 105005, RUSSIA; FINANCIAL UNIVERSITY, GOVT RUSSIA…	CRYPTO ASSETS; IFRS; BITCOIN; VALUATION MODELS; ECONOMICS; RECOGNITION; MEASUREMENT; INTANGIBLE ASSETS; INVENTORY; CASH; CASH EQUIVALENTS; FINANCIAL INSTRUMENTS	10.9770/jesi.2020.7.3(49)	ARTICLE	SAFE HAVEN; BITCOIN; HEDGE; IOT	ENTREP SUSTAIN ISS	ENTREPRENEURSHIP. SUSTAIN.	ENGLISH	ENTERPRENEURSHIP & SUSTAINABILITY CENTER	2020	AKHMADEEV, R (CORRESPONDING AUTHOR), PRUE, SFREMYANNY LANE 36, MOSCOW 117997, RUSSIA.	2345-0282	ENTREPRENEURSHIP AND SUSTAINABILITY ISSUES	30	CRYPTO ASSET ASSESSMENT MODELS IN FINANCIAL REPORTING CONTENT TYPOLOGIES	7	ISI	PLEKHANOV RUSSIAN UNIVERSITY OF ECONOMICS; SECHENOV FIRST MOSCOW STATE MEDICAL UNIVERSITY; BAUMAN MOSCOW STATE TECHNICAL UNIVERSITY; FINANCIAL UNIVERSITY UNDER THE GOVERNMENT OF RUSSIAN FEDERATION	R (CORRESPONDING AUTHOR)	#N/A	MOROZOVA T, 2020, ENTREP SUSTAIN ISS	MOROZOVA T, 2020, ENTREP SUSTAIN ISS
MOSTEANU NR, 2020, QUAL-ACCESS SUCCESS	MOSTEANU N; FACCIA A	MOSTEANU, NARCISA ROXANA; FACCIA, ALESSIO	ABDOLMOHAMMADI M, 2017, INT J ACCOUNT INF SY, V25, P45, DOI 10.1016/J.ACCINF.2017.03.002; AMAT O, 2019, EC WORKING PAPER SER; ANONYMOUS, J INFORM SYSTEMS OPE; ASTUTY W, 2019, KUMPULAN J DOSEN U M, V7; BLANKESPOOR E, 2019, J ACCOUNTING RES; CALVO D, 2018, FINANCIAL SUPERVISORY ARCHITECTURE: WHAT HAS CHANGED AFTER THE CRISIS?; CLARK J, 2017, XML PATH LANGUAGE XP; COLE E, 2016, INT J BUSINESS APPL, …	MANAGEMENT OF PUBLIC FINANCE AND ECONOMIC DEVELOPMENT IS THE ART BY WHICH A NATION IMPROVES THE ECONOMIC, POLITICAL AND SOCIAL WELL-BEING OF ITS PEOPLE. THE RESEARCH PAPER STARTS FROM THE REALITY THAT FINANCE PLAYS AN IMPORTANT ROLE IN EACH ECONOMY. NOWADAYS, FINANCE HAS TO MANAGE AND ADAPT TO DIGITAL ERA. THE PURPOSE OF THIS PAPER IS AN ATTEMPT TO IDENTIFY AND ENCOURAGE MANAGING FINANCIAL STATEM…	#N/A	#N/A	AMERICAN UNIVERSITY MALTA, COSPICUA, MALTA; COVENTRY UNIVERSITY, COVENTRY, W MIDLANDS, UNITED KINGDOM;	MANAGEMENT OF FINANCE; ARTIFICIAL INTELLIGENCE; XBRL; BLOCKCHAIN; DIGITAL FINANCE; ERROR REDUCTION	#N/A	ARTICLE	#N/A	QUAL-ACCESS SUCCESS	QUAL.-ACCESS SUCCESS	ENGLISH	SOC ROMANA PENTRU ASIGURAREA CALITATII	2020	MOSTEANU, NR (CORRESPONDING AUTHOR), AMER UNIV MALTA, COSPICUA, MALTA.	1582-2559	QUALITY-ACCESS TO SUCCESS	47	DIGITAL SYSTEMS AND NEW CHALLENGES OF FINANCIAL MANAGEMENT FINTECH XBRL BLOCKCHAIN AND CRYPTOCURRENCIES	21	ISI	COVENTRY UNIVERSITY	AMER UNIV MALTA	#N/A	MOSTEANU NR, 2020, QUAL-ACCESS SUCCESS	MOSTEANU NR, 2020, QUAL-ACCESS SUCCESS
MUNTEANU I, 2023, ECON COMPUT ECON CYB	MUNTEANU I; AIVAZ K; MICU A; CAPATANA A; JAKUBOWICZ V	MUNTEANU, IONELA; AIVAZ, KAMER-AINUR; MICU, ADRIAN; CAPATANA, ALEXANDRU; JAKUBOWICZ, VALENTIN	ABAD-SEGURA E, 2021, MATHEMATICS-BASEL, V9, DOI 10.3390/MATH9141631; AFZAL A, 2019, THE LAHORE JOURNAL OF ECONOMICS, V24, P103; BARTOLETTI M, 2018, 2018 CRYPTO VALLEY CONFERENCE ON BLOCKCHAIN TECHNOLOGY (CVCBT), P75, DOI 10.1109/CVCBT.2018.00014; CHOU J, 2022, STUD ECON FINANC, V39, P471, DOI 10.1108/SEF-10-2021-0469; CONG L, 2021, REV FINANC STUD, V34, P1105, DOI 10.1093/RFS/HHAA089; COYNE J, 20…	THIS STUDY ANALYSES THE EVOLUTION OF THE CRYPTO ASSET MARKET OVER THE PERIOD 2014-2023 AND ADDRESSES A SERIES OF ISSUES RELATING TO GLOBAL CRYPTO-ASSETS REGULATIONS UNIFORMITY, THE OPPORTUNITY FOR COMPANIES TO DEVELOP CRYPTO-ASSET TRANSACTIONS, AND THE ACCOUNTING REFLECTION OF THESE TRANSACTIONS THAT IMPACTS THE SUSTAINABLE REPORTING. WORKING HYPOTHESES ARE TWOFOLD: (A) CRYPTO ASSETS TRANSACTIONS…	#N/A	#N/A	OVIDIUS UNIVERSITY CONSTANTA, CONSTANTA, ROMANIA; DUNAREA DE JOS UNIVERSITY GALATI, GALATI, ROMANIA; BUCHAREST UNIVERSITY ECON STUDIES, BUCHAREST, ROMANIA;	DIGITAL TECHNOLOGIES; CRYPTO ASSETS; DIGITAL INVESTMENTS; SUSTAINABILITY; ACCOUNTING; RISK	10.24818/18423264/57.3.23.12	ARTICLE	BLOCKCHAIN; TECHNOLOGY	ECON COMPUT ECON CYB	ECON. COMPUT. ECON. CYBERN. STUD.	ENGLISH	EDITURA ASE	2023	MUNTEANU, I (CORRESPONDING AUTHOR), OVIDIUS UNIV CONSTANTA, CONSTANTA, ROMANIA.	0424-267X	ECONOMIC COMPUTATION AND ECONOMIC CYBERNETICS STUDIES AND RESEARCH	2	DIGITAL TRANSFORMATIONS IMPRINT FINANCIAL CHALLENGES ACCOUNTING ASSESSMENT OF CRYPTO ASSETS AND BUILDING RESILIENCE IN EMERGING INNOVATIVE BUSINESSES	57	ISI	OVIDIUS UNIVERSITY; DUNAREA DE JOS UNIVERSITY GALATI; BUCHAREST UNIVERSITY OF ECONOMIC STUDIES	OVIDIUS UNIV CONSTANTA	#N/A	MUNTEANU I, 2023, ECON COMPUT ECON CYB	MUNTEANU I, 2023, ECON COMPUT ECON CYB
NIFTALIYEV SG, 2023, FINANC CREDIT ACT	NIFTALIYEV S	NIFTALIYEV, SULTAN GURBAN	AL-DULAIM A, 2021, J INT BUSINESS EC MA, V6, P505; ALI R, 2014, BANK ENGL Q BULL, VQ3; BRUKHANSKYI R, 2019, 2019 9TH INTERNATIONAL CONFERENCE ON ADVANCED COMPUTER INFORMATION TECHNOLOGIES (ACIT'2019), P384, DOI 10.1109/ACITT.2019.8780073, 10.1109/ACITT.2019.8780073; COINGECKO, CRYPT PRIC MARK CAP; COLLOMB A, 2016, DIGIWORLD ECON. J., V103; IFRS FOUNDATION, ABOUT US; JUDMAYER A, 2017, SYNTHESIS LE…	THE STUDY PROVIDES DETAILED INFORMATION ABOUT THE CRYPTOCURRENCY MARKET AS AN IFRS OBJECT AND INDICATES THE METHODS OF THEIR ACCOUNTING AND THEIR FEATURES. DATA ON THE CHANGE IN THE TOTAL MARKET CAPITALIZATION OF CRYPTOCURRENCIES ARE SHOWN, AND THE REASONS FOR WHICH THEY WENT INTO DECLINE ARE REVEALED. COMPANIES THAT MAY BE INTERESTED IN ACCOUNTING FOR CRYPTOCURRENCIES UNDER IFRS ARE CONSIDERED, …	#N/A	#N/A	AZERBAIJAN STATE UNIVERSITY ECON UNEC, LEAD CORP LOANS DEPT, KAPITAL BANK ASC, BAKU, AZERBAIJAN;	CRYPTOCURRENCY; IFRS; INTANGIBLE ASSET; RESERVES; IASB; ACCOUNTING	10.55643/fcaptp.3.50.2023.4046	ARTICLE	#N/A	FINANC CREDIT ACT	FINANC. CREDIT ACT.	ENGLISH	FINTECHALIANCE	2023	NIFTALIYEV, SG (CORRESPONDING AUTHOR), AZERBAIJAN STATE UNIV ECON UNEC, LEAD CORP LOANS DEPT, KAPITAL BANK ASC, BAKU, AZERBAIJAN.	2306-4994	FINANCIAL AND CREDIT ACTIVITY-PROBLEMS OF THEORY AND PRACTICE	1	PROBLEMS ARISING IN THE ACCOUNTING OF CRYPTOCURRENCIES	3	ISI	MINISTRY OF EDUCATION OF AZERBAIJAN REPUBLIC; AZERBAIJAN STATE UNIVERSITY OF ECONOMICS (UNEC)	AZERBAIJAN STATE UNIV ECON UNEC	#N/A	NIFTALIYEV SG, 2023, FINANC CREDIT ACT	NIFTALIYEV SG, 2023, FINANC CREDIT ACT
NTANOS S, 2020, SPRINGER PROC BUS ECON	NTANOS S; ASONITOU S; KARYDAS D; KYRIAKOPOULOS G	NTANOS STAMATIOS; ASONITOU SOFIA; KARYDAS DIMITRIOS; KYRIAKOPOULOS GRIGORIOS	none	WHILE MOST BLOCKCHAIN TECHNOLOGY SEEMS TO BE NEW, APPLICATIONS OF THIS TECHNOLOGY, BEYOND ELECTRONIC PAYMENTS, SUCH AS SUPPLY CHAINS, HEALTH CARE AND ASSET MANAGEMENT APPEAR EVERY DAY. ALL OF THEM STEM FROM THE DISTINCTIVE ADVANTAGES OF BLOCKCHAIN TECHNOLOGY; VOLATILITY, TRUST, TRANSPARENCY AND RELIABILITY. BLOCKCHAIN ALREADY AFFECTS THE BANKING AND ACCOUNTING SECTORS, AND ALL ITS ECONOMY-ABIDED …	KAVOURA A. AND KEFALLONITIS E. AND THEODORIDIS P.	978-303036125-9	UNIVERSITY OF WEST ATTICA, EGALEO, GREECE; NATIONAL TECHNICAL UNIVERSITY OF ATHENS, ZOGRAFOU, GREECE;	ACCOUNTING; BITCOIN; BLOCKCHAIN; CRYPTOCURRENCY; CYBERSECURITY; FRAUD; TRANSPARENCY	10.1007/978-3-030-36126-6_80	CONFERENCE PAPER	#N/A	SPRINGER PROC BUS ECON	SPRINGER PROC. BUS. ECON.	ENGLISH	SPRINGER SCIENCE AND BUSINESS MEDIA B.V.	2020	S. NTANOS; UNIVERSITY OF WEST ATTICA, EGALEO, GREECE; EMAIL: SDANOS@UNIWA.GR	21987246	SPRINGER PROCEEDINGS IN BUSINESS AND ECONOMICS	1	BLOCKCHAIN TECHNOLOGY A CASE STUDY FROM GREEK ACCOUNTANTS	#N/A	ISI	UNIVERSITY OF WEST ATTICA;NATIONAL TECHNICAL UNIVERSITY OF ATHENS	NOTREPORTED;UNIVERSITY OF WEST ATTICA;NOTREPORTED	#N/A	NTANOS S, 2020, SPRINGER PROC BUS ECON	NTANOS S, 2020, SPRINGER PROC BUS ECON
NYLEN PC, 2022, ATA J LEG TAX RES	NYLEN P; HUELS B	NYLEN, PAUL C.; HUELS, BRIAN W.	ADAMS M, 2021, ATA J LEG TAX RES, V19, P61, DOI 10.2308/JLTR-2020-007; ANONYMOUS, FREQ ASK QUEST VIRT; ANONYMOUS, CRYPT LEND INT RAT; ANONYMOUS, 1928, COUZENS CIR; ANONYMOUS, CELS NETW US;ANONYMOUS, COIN TRACKER; ANONYMOUS, H R 3684 AMENDMENT; ANONYMOUS, REP FORE BANK FIN AC; ANONYMOUS, IRS FORM 8938 WHO MU; ANONYMOUS, 2022, THE BALANCE; ANONYMOUS, 1983, LUCE US; ANONYMOUS, 1920, EISNER V. MACOMB…	THE CRYPTOCURRENCY MARKET HAS BECOME ONE OF THE FASTEST GROWING INDUSTRIES IN THE WORLD, WITH A MARKET CAPITALIZATION EXCEEDING $2 TRILLION. THIS RAPID GROWTH HAS CAUSED STRAINS ON FINANCIAL SYSTEMS, AS WELL AS THE INTERNAL REVENUE SERVICE. WITH CRYPTOCURRENCY TECHNOLOGY DEVELOPING FASTER BY THE WEEK, A UNIFIED AND SIMPLIFIED REGULATORY APPROACH IS THE SENSIBLE ROADMAP FOR THE INTERNAL REVENUE SE…	#N/A	#N/A	UNIVERSITY WISCONSIN, COLL BUSINESS & ECON, DEPT ACCOUNTING, WHITEWATER, WI 53190, USA;	CRYPTO; BITCOIN; IRS; TAXATION	10.2308/JLTR-2021-008	ARTICLE	#N/A	ATA J LEG TAX RES	ATA J. LEG. TAX RES.	ENGLISH	AMER ACCOUNTING ASSOC	2022	NYLEN, PC (CORRESPONDING AUTHOR), UNIV WISCONSIN, COLL BUSINESS & ECON, DEPT ACCOUNTING, WHITEWATER, WI 53190 USA.	1543-866X	ATA JOURNAL OF LEGAL TAX RESEARCH	0	USING UNRELATED IRS GUIDANCE AS A FRAMEWORK FOR TAXING CRYPTO TRANSACTIONS REVENUE PROCEDURE 201918	20	ISI	UNIVERSITY OF WISCONSIN SYSTEM	UNIV WISCONSIN	#N/A	NYLEN PC, 2022, ATA J LEG TAX RES	NYLEN PC, 2022, ATA J LEG TAX RES
OBU OC, 2022, REV APPL SOCIO-ECON RES	OBU O; UKPERE W	OBU OSIEBUNI COLLINS; UKPERE WILFRED I	none	EXISTING LITERATURE HAS EXAMINED A PLETHORA OF FACTORS THAT CAN AFFECT THE EFFECTIVENESS, PERFORMANCE, OR NATURE OF FISCAL POLICY IN AN ECONOMY. IN THIS PAPER, WE BUILD ON THE FUNDAMENTAL TENETS OF MICRO-ECONOMIC MODELS TO EXAMINE THE POTENTIAL WAYS CRYPTOCURRENCIES CAN AFFECT THE EFFECTIVENESS OF A COUNTRY’S FISCAL POLICY. OUR FINDING IS THAT UNDER THE ASSUMPTIONS OF AN ABSENCE OF UNCERTAINTIES,…	#N/A	#N/A	NHH NORWEGIAN SCHOOL OF ECONOMIC, DEPARTMENT OF ECONOMICS AND BUSINESS ADMINISTRATION, NORWAY; UNIVERSITY OF JOHANNESBURG, DEPARTMENT OF INDUSTRIAL PSYCHOLOGY AND PEOPLE MANAGEMENT, SCHOOL OF MANAGEMENT, COLLEGE OF BUSINESS & ECONOMIC, HELLEVEIEN 30, BERGEN, 5045, NORWAY;	CRYPTOCURRENCY; EFFECTIVENESS; FISCAL POLICY; MICRO-ECONOMIC MODELS; TECHNOLOGY	10.54609/reaser.v23i1.214	ARTICLE	#N/A	REV APPL SOCIO-ECON RES	REV. APPL. SOCIO-ECON. RES.	ENGLISH	PRO GLOBAL SCIENCE ASSOCIATION	2022	O.C. OBU; DEPARTMENT OF ECONOMICS AND BUSINESS ADMINISTRATION, NHH NORWEGIAN SCHOOL OF ECONOMIC, NORWAY; EMAIL: OSIEBUNIO@GMAIL.COM	22476172	REVIEW OF APPLIED SOCIO-ECONOMIC RESEARCH	2	THE IMPLICATIONS OF THE INCURSION OF CRYPTOCURRENCY ON THE EFFECTIVENESS OF FISCAL POLICY	23	ISI	NHH NORWEGIAN SCHOOL OF ECONOMIC;UNIVERSITY OF JOHANNESBURG	NOTREPORTED;NHH NORWEGIAN SCHOOL OF ECONOMIC;NOTREPORTED	#N/A	OBU OC, 2022, REV APPL SOCIO-ECON RES	OBU OC, 2022, REV APPL SOCIO-ECON RES
O'LEARY DE, 2018, INTELL SYST ACCOUNT	O'LEARY D	O'LEARY, DANIEL E.	ANONYMOUS, 2018, REUTERS; ANONYMOUS, 2017, HACKER NOON; ARROW K. J., 1970, SOCIAL CHOICE INDIVI; BLOOMBERG, 2018, LOS ANGELES TIMES, PC2; CANADA CPA, 2018, BLOCKCH TECHN ITS PO; CAREY B, 2017, NY TIMES; COYNE J, 2017, J EMERG TECHNOL ACCO, V14, P101, DOI 10.2308/JETA-51910; DAI J, 2017, J INF SYST, V31, P5, DOI 10.2308/ISYS-51804; DELOITTE U, 2017, US BLOCKCH DRIV SUPP; FBI, 2012, BITC VIRT CURR …	THIS PAPER INVESTIGATES WHAT ARE REFERRED TO AS OPEN INFORMATION TRANSACTIONS'. SUCH TRANSACTIONS ARE IN CONTRAST TO TRADITIONAL TRANSACTIONS, WHERE TYPICALLY TWO PARTIES TO A TRANSACTION ARE THE ONLY ONES WITH INFORMATION ABOUT THE TRANSACTION. FOR EXAMPLE, IN A SALE, THE SELLER AND THE PURCHASER TYPICALLY ARE THE ONLY ONES WITH INFORMATION ABOUT THE TRANSACTION. HOWEVER, SOME EMERGING TECHNOLOG…	#N/A	#N/A	UNIVERSITY SOUTHERN CALIF, LOS ANGELES, CA, USA;	ASYMMETRIES OF INFORMATION; BITCOIN; BLOCKCHAIN; BLOCKCHAIN ELECTRONIC MARKETS; DYNAMIC PRICING; FRAUD; HASHTAG COMMERCE; INFORMATION VISIBILITY; MISLEADING TRADES; OFF-BLOCKCHAIN TRANSACTIONS; OPEN INFORMATION TRANSACTIONS; SOCIAL COMMERCE; SPOOF TRADES; WASH TRADES	10.1002/isaf.1438	ARTICLE	PREDICTION; SYSTEMS; MEDIA	INTELL SYST ACCOUNT	INTELL. SYST. ACCOUNT. FINANC. MANAG.	ENGLISH	JOHN WILEY & SONS LTD	2018	O'LEARY, DE (CORRESPONDING AUTHOR), UNIV SOUTHERN CALIF, MARSHALL SCH BUSINESS, 3660 TROUSDALE PKWY, LOS ANGELES, CA 90089 USA.	1055-615X	INTELLIGENT SYSTEMS IN ACCOUNTING FINANCE & MANAGEMENT	25	OPEN INFORMATION ENTERPRISE TRANSACTIONS BUSINESS INTELLIGENCE AND WASH AND SPOOF TRANSACTIONS IN BLOCKCHAIN AND SOCIAL COMMERCE	25	ISI	UNIVERSITY OF SOUTHERN CALIFORNIA	UNIV SOUTHERN CALIF	#N/A	O'LEARY DE, 2018, INTELL SYST ACCOUNT	O'LEARY DE, 2018, INTELL SYST ACCOUNT
OZERAN A, 2020, ECON ANN-XXI	OZERAN A; GURA N	OZERAN, ALLA; GURA, NADIIA	ALZOUBI E, 2018, J INT ACCOUNT AUDIT, V30, P69, DOI DOI 10.1016/J.INTACCAUDTAX.2017.12.001; ANKENBRAND T, 2020, 2020 CRYPTO VALLEY CONFERENCE ON BLOCKCHAIN TECHNOLOGY (CVCBT 2020), P16, DOI 10.1109/CVCBT50464.2020.00006; ANONYMOUS, 2004, 38 IAS; AU M, 2020, FUTURE GENER COMP SY, V107, P758, DOI 10.1016/J.FUTURE.2019.06.001; BHATTACHARJEE S, 2020, AUDITING-J PRACT TH, V39, P29, DOI 10.2308/AJPT-18…	INTRODUCTION. THE RAPID RISE AND VOLATILITY OF CRYPTOASSETS HAVE LED TO INCREASED GLOBAL INTEREST BY GOVERNMENTS, INVESTORS, REGULATORS. IN 2020, THE MARKET CAPITALIZATION OF CRYPTOCURRENCIES INCREASED TO USD 758.06 BILLION BY EXPERT ESTIMATIONS. EACH OF THE CRYPTOASSETS HAS ITS OWN UNIQUE FEATURES AND CHARACTERISTICS WHICH MAKES THEIR ACCOUNTING AND AUDITING CHALLENGING. THE LACK OF OFFICIAL ACC…	#N/A	#N/A	KYIV NATIONAL ECON UNIVERSITY, ACCOUNTING & TAXAT DEPT, 54-1 PEREMOHY AVE, UA-03057 KIEV, UKRAINE; TARAS SHEVCHENKO NATIONAL UNIVERSITY KYIV, 90A VASYLKIVSKA STR, UA-03022 KIEV, UKRAINE;	CRYPTO ASSETS; CRYPTOCURRENCY; AUDITING; INTERNAL CONTROL; DECENTRALIZED FINANCE; DEFI; ASSERTIONS	10.21003/ea.V184-11	ARTICLE	#N/A	ECON ANN-XXI	ECON. ANN.-XXI	ENGLISH	INST SOC TRANSFORMATION	2020	OZERAN, A (CORRESPONDING AUTHOR), KYIV NATL ECON UNIV, ACCOUNTING & TAXAT DEPT, 54-1 PEREMOHY AVE, UA-03057 KIEV, UKRAINE.	1728-6220	ECONOMIC ANNALS-XXI	3	AUDIT AND ACCOUNTING CONSIDERATIONS ON CRYPTOASSETS AND RELATED TRANSACTIONS	184	ISI	MINISTRY OF EDUCATION AND SCIENCE OF UKRAINE; KYIV NATIONAL ECONOMIC UNIVERSITY NAMED AFTER VADYM HETMAN; MINISTRY OF EDUCATION AND SCIENCE OF UKRAINE; TARAS SHEVCHENKO NATIONAL UNIVERSITY OF KYIV	KYIV NATL ECON UNIV	#N/A	OZERAN A, 2020, ECON ANN-XXI	OZERAN A, 2020, ECON ANN-XXI
OZILI PK, 2023, DIGIT POLI REGUL GOVERN	OZILI P	OZILI PETERSON K	none	PURPOSE: THE PURPOSE OF THIS STUDY IS TO DISCUSS THE ROLE OF CENTRAL BANK DIGITAL CURRENCY (CBDC), FINTECH AND CRYPTOCURRENCY FOR FINANCIAL INCLUSION AND FINANCIAL STABILITY. DESIGN/METHODOLOGY/APPROACH: THIS STUDY USED CRITICAL DISCOURSE ANALYSIS TO IDENTIFY THE BENEFITS AND RISKS OF CBDC, FINTECH AND CRYPTOCURRENCY FOR FINANCIAL INCLUSION AND FINANCIAL STABILITY. FINDINGS: FINTECH, CBDC AND CRY…	#N/A	#N/A	CENTRAL BANK OF NIGERIA, GOVERNORS DEPARTMENT, ABUJA, NIGERIA;	BLOCKCHAIN; CBDC; CRYPTOCURRENCY; FINANCIAL INCLUSION; FINANCIAL STABILITY; FINTECH	10.1108/DPRG-04-2022-0033	ARTICLE	#N/A	DIGIT POLI REGUL GOVERN	DIGIT. POLI. REGUL. GOVERN.	ENGLISH	EMERALD PUBLISHING	2023	P.K. OZILI; GOVERNORS DEPARTMENT, CENTRAL BANK OF NIGERIA, ABUJA, NIGERIA; EMAIL: PETERSONKITAKOGELU@YAHOO.COM	23985038	DIGITAL POLICY, REGULATION AND GOVERNANCE	26	CBDC FINTECH AND CRYPTOCURRENCY FOR FINANCIAL INCLUSION AND FINANCIAL STABILITY	25	ISI	#N/A	NOTREPORTED;NOTREPORTED;NOTREPORTED	#N/A	OZILI PK, 2023, DIGIT POLI REGUL GOVERN	OZILI PK, 2023, DIGIT POLI REGUL GOVERN
PAN L, 2023, J RISK FINANC MANAG	PAN L; VAUGHAN O; WRIGHT C	PAN LIUXUAN; VAUGHAN OWEN; WRIGHT CRAIG STEVEN	none	THE ‘BIG FOUR’ ACCOUNTANCY FIRMS DOMINATE THE AUDITING MARKET, AUDITING ALMOST ALL THE FINANCIAL TIMES STOCK EXCHANGE (FTSE) 100 COMPANIES. THIS LEADS TO PEOPLE HAVING TO ACCEPT AUDITING RESULTS EVEN IF THEY MAY BE POOR QUALITY AND/OR FOR INADEQUATE PURPOSES. IN ADDITION, ACCOUNTANTS MAY PROVIDE DIFFERENT AUDITING RESULTS WITH THE SAME FINANCIAL DATA. THESE ISSUES ARE HARD FOR REGULATORS SUCH AS …	#N/A	#N/A	NCHAIN LTD, 30 MARKET PLACE, LONDON, W1W 8AP, UNITED KINGDOM;	AUDITING; BITCOIN; BLOCKCHAIN; PRIVACY; TRIPLE-ENTRY ACCOUNTING	10.3390/jrfm16090400	ARTICLE	#N/A	J RISK FINANC MANAG	J. RISK. FINANC. MANAG.	ENGLISH	MULTIDISCIPLINARY DIGITAL PUBLISHING INSTITUTE (MDPI)	2023	L. PAN; NCHAIN LTD, LONDON, 30 MARKET PLACE, W1W 8AP, UNITED KINGDOM; EMAIL: L.PAN@NCHAIN.COM	19118074	JOURNAL OF RISK AND FINANCIAL MANAGEMENT	1	A PRIVATE AND EFFICIENT TRIPLEENTRY ACCOUNTING PROTOCOL ON BITCOIN	16	ISI	#N/A	NOTREPORTED;NOTREPORTED;NOTREPORTED	#N/A	PAN L, 2023, J RISK FINANC MANAG	PAN L, 2023, J RISK FINANC MANAG
PANDEY D, 2024, J FINANC REPORT ACCO	PANDEY D; GILMOUR P	PANDEY, DURGESH; GILMOUR, PAUL	AICPA AND CIMA, 2022, ACCOUNT AUDIT ACCOUN; AL GNBRI M, 2022, J METAVERSE, V2, P29; ARORA K, 2022, ALL COMPLICATED STAT; BANI-KHALAF O, 2023, INVEST ANAL J, V52, P53, DOI 10.1080/10293523.2022.2155354; BELK R, 2022, J BUS RES, V153, P198, DOI 10.1016/J.JBUSRES.2022.08.031; BOUCHER P, 2017, BLOCKCHAIN TECHNOLOG; CANTLEY B, 2022, RUTGERS COMPUTER TEC, V49, P1; COCKROFT J, 2022, TAXATION METAVERSE; …	PURPOSETHE "METAVERSE" IS THE NEW BUZZWORD. WITH THE PHENOMENAL GROWTH OF THE METAVERSE COMES ACCOUNTING, TAXATION AND JURISDICTIONAL CHALLENGES, WHICH BUSINESS AND GOVERNMENTS HAVE YET TO FULLY ADDRESS. THIS PAPER AIMS TO HIGHLIGHT AND RATIONALISE THE LACK OF REGULATORY FRAMEWORK AND MULTIPLICITY OF JURISDICTIONS ON METAVERSE TRANSACTIONS. THIS PAPER ADDRESSES SOME OF THE COMPLICATIONS WITH RESP…	#N/A	#N/A	NATIONAL FORENS SCI UNIVERSITY, SCH MANAGEMENT STUDIES, GANHINAGAR, INDIA; UNIVERSITY PORTSMOUTH, CTR CYBERCRIME & ECON CRIME, PORTSMOUTH, UNITED KINGDOM;	METAVERSE; BLOCKCHAIN; TAX JURISDICTION; ACCOUNTING; TAXATION; NFT	10.1108/JFRA-03-2023-0157	ARTICLE	#N/A	J FINANC REPORT ACCO	J. FINANC. REPORT ACCOOUNT.	ENGLISH	EMERALD GROUP PUBLISHING LTD	2024	GILMOUR, P (CORRESPONDING AUTHOR), UNIV PORTSMOUTH, CTR CYBERCRIME & ECON CRIME, PORTSMOUTH, ENGLAND.	1985-2517	JOURNAL OF FINANCIAL REPORTING AND ACCOUNTING	3	ACCOUNTING MEETS METAVERSE NAVIGATING THE INTERSECTION BETWEEN THE REAL AND VIRTUAL WORLDS	22	ISI	UNIVERSITY OF PORTSMOUTH	UNIV PORTSMOUTH	#N/A	PANDEY D, 2024, J FINANC REPORT ACCO	PANDEY D, 2024, J FINANC REPORT ACCO
PANTIELIEIEVA NM, 2019, FINANC CREDIT ACT	PANTIELIEIEVA N; ROGOVA N; BRAICHENKO S; DZHOLOS S; KOLISNYK A	PANTIELIEIEVA, N. M.; ROGOVA, N., V; BRAICHENKO, S. M.; DZHOLOS, S., V; KOLISNYK, A. S.	KOCHERGIN D, 2011, ELEKTRONNYE DENGI; PANTELEEVA N, 2017, NOVI FORMY HROSHEI T, P153; PANTIELIEIEVA N, 2019, BULL NATL ACAD SCI R, P144, DOI 10.32014/2019.2518-1467.80	THE ARTICLE IS DEVOTED TO THE ANALYSIS OF TRANSFORMATION OF ECONOMIC RELATIONS DUE TO THE EMERGENCE OF SUCH PHENOMENON AS CRYPTOCURRENCY. IT IS SUBSTANTIATED THAT ITS APPEARANCE IS CONNECTED WITH THE DEVELOPMENT OF THE INFORMATION SOCIETY, THE FORMATION OF THE VIRTUAL ECONOMY AND THE SPREAD OF DIGITIZATION PROCESSES IN ALL SPHERES OF ECONOMIC ACTIVITY. IT IS PROVED THAT DESPITE THE INNOVATIVE NAT…	#N/A	#N/A	SHEI BANKING UNIVERSITY, CHERKASY EDUC SCI INST, KHARKOV, UKRAINE;	VIRTUAL CURRENCY; BLOCKCHAIN; CRYPTOCURRENCY; CIVIL LAW; CYBERTHREATS; CYBERCRIMINALITY	#N/A	ARTICLE	#N/A	FINANC CREDIT ACT	FINANC. CREDIT ACT.	ENGLISH	NATL BANK UKRAINE, UNIV BANKING, KHARKIV INST BANKING	2019	PANTIELIEIEVA, NM (CORRESPONDING AUTHOR), SHEI BANKING UNIV, CHERKASY EDUC SCI INST, KHARKOV, UKRAINE.	2306-4994	FINANCIAL AND CREDIT ACTIVITY-PROBLEMS OF THEORY AND PRACTICE	2	CURRENT ASPECTS OF TRANSFORMATION OF ECONOMIC RELATIONS CRYPTOCURRENCIES AND THEIR LEGAL REGULATION	4	ISI	MINISTRY OF EDUCATION AND SCIENCE OF UKRAINE; BANKING UNIVERSITY	SHEI BANKING UNIV	#N/A	PANTIELIEIEVA NM, 2019, FINANC CREDIT ACT	PANTIELIEIEVA NM, 2019, FINANC CREDIT ACT
PAPP A, 2023, J PUBLIC ECON	PAPP A; ALMOND D; ZHANG S	PAPP, ANNA; ALMOND, DOUGLAS; ZHANG, SHUANG	ADEJUMO O, 2021, KENTUCKY GOVERNOR SIGNS BITCOIN MINING INCENTIVE BILL INTO LAW; ANGRIST J, 2009, MOSTLY HARMLESS ECONOMETRICS: AN EMPIRICISTS COMPANION, P1; BENETTON M, 2021, WORKING PAPER; BLANDIN A, 2021, 3RD GLOBAL CRYPTOASSET BENCHMARK STUDY; BORENSTEIN S, 2002, AM ECON REV, V92, P1376, DOI 10.1257/000282802762024557; BORENSTEIN S, 2015, ANNU REV ECON, V7, P437, DOI 10.1146/ANNUREV-ECONOMICS…	ENVIRONMENTAL EXTERNALITIES FROM CRYPTOMINING MAY BE LARGE, BUT HAVE NOT BEEN LINKED CAUSALLY TO MINING INCENTIVES. WE EXPLOIT DAILY VARIATION IN BITCOIN PRICE AS A NATURAL EXPERIMENT FOR AN 86 MEGAWATT WASTE COAL-FIRED POWER PLANT WITH ON-SITE CRYPTOMINING. WE FIND THAT CARBON EMISSIONS RESPOND SWIFTLY TO MINING INCENTIVES, WITH PRICE ELASTICITIES OF 0.69-0.71 IN THE SHORT-RUN AND 0.33-0.40 IN T…	#N/A	#N/A	COLUMBIA UNIVERSITY, SCH INT & PUBL AFFAIRS, NEW YORK, NY 10027, USA; COLUMBIA UNIVERSITY, DEPT ECON, NEW YORK, NY, USA; NBER, CAMBRIDGE, MA, USA; IMPERIAL COLL LONDON, ECON & PUBL POLICY, LONDON, UNITED KINGDOM;	BITCOIN; CRYPTOCURRENCY; MINING; CARBON EMISSIONS; CLIMATE CHANGE	10.1016/j.jpubeco.2023.105003	ARTICLE	FOOTPRINT	J PUBLIC ECON	J. PUBLIC ECON.	ENGLISH	ELSEVIER SCIENCE SA	2023	PAPP, A (CORRESPONDING AUTHOR), COLUMBIA UNIV, SCH INT & PUBL AFFAIRS, NEW YORK, NY 10027 USA.	0047-2727	JOURNAL OF PUBLIC ECONOMICS	0	BITCOIN AND CARBON DIOXIDE EMISSIONS EVIDENCE FROM DAILY PRODUCTION DECISIONS	227	ISI	COLUMBIA UNIVERSITY; COLUMBIA UNIVERSITY; NATIONAL BUREAU OF ECONOMIC RESEARCH; IMPERIAL COLLEGE LONDON	COLUMBIA UNIV	#N/A	PAPP A, 2023, J PUBLIC ECON	PAPP A, 2023, J PUBLIC ECON
PARRONDO L, 2020, FEMIB: PROCEEDINGS OF THE 2ND INTERNATIONAL CONFERENCE ON FINANCE, ECONOMICS, MANAGEMENT AND IT BUSINESS	PARRONDO L	PARRONDO, LUZ	ANONYMOUS, 2018, CONS CNMV CRYPT ICOS; ANONYMOUS, 2018, BANK FOR INTERNATIONAL SETTLEMENTS; BASHIR I, 2018, MASTERING BLOCKCHAIN; BECK R, 2016, PROC. 24TH EUR. CONF. INF. SYST, P1; BORDO M, 2017, HOOVER INSTITUTION ECONOMICS WORKING PAPER 1; BROOKS S, 2018, HAVVEN: A DECENTRALISED PAYMENT NETWORK AND STABLECOIN; CATALINI C, 2016, NBER WORKING PAPER S, V23, P111, DOI DOI 10.3386/W22952; COINBASE, …	DISTRIBUTED LEDGER TECHNOLOGIES (DLT) ARE DISTRIBUTED, SECURED AND IMMUTABLE LEDGERS THAT ALLOW TECHNOLOGY TO INTERMEDIATE AND EMPOWER NEW ECOSYSTEM-BASED BUSINESS MODELS. DLT-BASED TOKENS DIGITALLY REPRESENT A WIDE VARIETY OF ASSETS FROM SECURITIES TO COMMODITIES OR MERELY AS MEANS OF PAYMENT WITHIN A DLT NETWORK. HOWEVER, DLT-TOKENS MAY (ALTERNATIVELY OR JOINTLY) GRANT DIGITAL ACCESS TO A DLT P…	BAUDIER, P ARAMI, M CHANG, V	978-989-758-422-0	UPF BARCELONA SCH MANAGEMENT, BAMES 132, BARCELONA, SPAIN; POMPEU FABRA UNIVERSITY, RAMON TRIAS FARGAS 18, BARCELONA, SPAIN;	DISTRIBUTED LEDGER TECHNOLOGY; BLOCKCHAIN; CRYPTOCURRENCY; CRYPTO ASSETS; TOKENS; STABLECOINS; ACCOUNTING	10.5220/0008937600150026	PROCEEDINGS PAPER	#N/A	FEMIB: PROCEEDINGS OF THE 2ND INTERNATIONAL CONFERENCE ON FINANCE, ECONOMICS, MANAGEMENT AND IT BUSINESS	#N/A	ENGLISH	SCITEPRESS	2020	PARRONDO, L (CORRESPONDING AUTHOR), UPF BARCELONA SCH MANAGEMENT, BAMES 132, BARCELONA, SPAIN.; PARRONDO, L (CORRESPONDING AUTHOR), POMPEU FABRA UNIV, RAMON TRIAS FARGAS 18, BARCELONA, SPAIN.	#N/A	FEMIB: PROCEEDINGS OF THE 2ND INTERNATIONAL CONFERENCE ON FINANCE, ECONOMICS, MANAGEMENT AND IT BUSINESS	1	DLTBASED TOKENS CLASSIFICATION TOWARDS ACCOUNTING REGULATION	#N/A	ISI	POMPEU FABRA UNIVERSITY	UPF BARCELONA SCH MANAGEMENT;POMPEU FABRA UNIV	#N/A	PARRONDO L, 2020, FEMIB: PROCEEDINGS OF THE 2ND INTERNATIONAL CONFERENCE ON FINANCE, ECONOMICS, MANAGEMENT AND IT BUSINESS	PARRONDO L, 2020, FEMIB: PROCEEDINGS OF THE 2ND INTERNATIONAL CONFERENCE ON FINANCE, ECONOMICS, MANAGEMENT AND IT BUSINESS
PARRONDO L, 2023, INTELL SYST ACCOUNT	PARRONDO L	PARRONDO, LUZ	AUER R, 2019, EMBEDDED SUPERVISION; AUSTRALIAN ACCOUNTING STANDARDS BOARD, 2016, DIGITAL CURRENCY A C; BARTOSOVA V, 2019, ACAD ACCOUNTING FINA, V23 ;BENEDETTI H, 2018, DIGITAL TULIPS? RETURNS TO INVESTORS IN INITIAL COIN OFFERINGS, DOI DOI 10.2139/SSRN.3182169; BERENTSEN A, 2018, FED RESERVE BANK ST, V100, P97, DOI 10.20955/R.2018.97-106; BOURVEAU B, 2018, INITIAL COIN OFFERIN; CHOU J, 2022, STUD…	THIS PAPER PROVIDES A FIRST COMPREHENSIVE DEFINITION OF CRYPTOASSETS FOR ACCOUNTING PURPOSES IN THE TYPES OF PAYMENT TOKENS, ELECTRONIC MONEY (E-MONEY) TOKENS, UTILITY TOKENS AND SECURITY TOKENS. THE DELIVERY OF DEFINITIONS FOR ACCOUNTING PURPOSES ADDRESSES SOME OF THE CONCERNS RAISED BY THE EUROPEAN FINANCIAL REPORTING ADVISORY GROUP (EFRAG) DISCUSSION PAPER AND HELPS ACCOUNTING REGULATORS ADAPT…	#N/A	#N/A	POMPEU FABRA UNIVERSITY, UPF, BARCELONA SCH MANAGEMENT, BARCELONA, SPAIN;	ACCOUNTING; CRYPTOASSETS; IFRS; MICA; PAYMENT TOKENS; SECURITY TOKEN; TOKENS; UTILITY TOKENS	10.1002/isaf.1543	ARTICLE	#N/A	INTELL SYST ACCOUNT	INTELL. SYST. ACCOUNT. FINANC. MANAG.	ENGLISH	JOHN WILEY & SONS LTD	2023	PARRONDO, L (CORRESPONDING AUTHOR), POMPEU FABRA UNIV, UPF, BARCELONA SCH MANAGEMENT, BARCELONA, SPAIN.	1055-615X	INTELLIGENT SYSTEMS IN ACCOUNTING FINANCE & MANAGEMENT	0	CRYPTOASSETS DEFINITIONS AND ACCOUNTING TREATMENT UNDER THE CURRENT INTERNATIONAL FINANCIAL REPORTING STANDARDS FRAMEWORK	30	ISI	POMPEU FABRA UNIVERSITY	POMPEU FABRA UNIV	#N/A	PARRONDO L, 2023, INTELL SYST ACCOUNT	PARRONDO L, 2023, INTELL SYST ACCOUNT
PAUNESCU M, 2018, PROC INT C ACC	PAUNESCU M	PAUNESCU, MIRELA	ANONYMOUS, 2018, ACC CRYPT ASS EY; ANONYMOUS, 2013, APPL FINC REG PERS A; BERCHOWITZ G, 2017, ACCOUNTING CRYPTOCUR; BITCOIN GROUP SE, 2017, FIN STAT; BÖHME R, 2015, J ECON PERSPECT, V29, P213, DOI 10.1257/JEP.29.2.213; CHAMBER OF DIGITAL COMMERCE, 2017, AG REQ DET APPR REC; EUROPEAN BANKING AUTHORITY, 2014, EBA OP VIRT CURR; EUROPEAN CENTRAL BANK, 2015, VIRT CURR SCHEM FURT; FRANKLIN M, 2016, INT…	LIKE IN MANY OTHER SITUATIONS WHEN THE REPORTING ENTITY GETS INVOLVED IN NEW, MODERN BUSINESS MODELS, OR USES THE TOOLS OR TECHNOLOGY OF THE FUTURE, IT IS THE ACCOUNTANT WHO HAS TO SPEND LONG HOURS TO DECIDE HOW TO REFLECT THE TRANSACTIONS IN THE FINANCIAL STATEMENTS AND EVEN MORE HOURS TO CONVINCE THE MANAGEMENT THAT, EVEN IF THEY BELIEVED THEY'LL SEE A BOOST IN THE PROFIT, THE RESULTS ARE NOT U…	#N/A	#N/A	BUCHAREST UNIVERSITY ECON STUDIES, BUCHAREST, ROMANIA;	ACCOUNTING; CRYPTOCURRENCY; DIGITAL CURRENCY; VIRTUAL CURRENCY; BITCOIN	#N/A	PROCEEDINGS PAPER	BITCOIN	PROC INT C ACC	#N/A	ENGLISH	EDITURA ASE	2018	PAUNESCU, M (CORRESPONDING AUTHOR), BUCHAREST UNIV ECON STUDIES, DEPT ACCOUNTING & AUDIT, 6 PIATA ROMANA,1ST DIST, BUCHAREST 010374, ROMANIA.	2247-6245	PROCEEDINGS OF THE 13TH INTERNATIONAL CONFERENCE ACCOUNTING AND MANAGEMENT INFORMATION SYSTEMS (AMIS 2018)	0	THE ACCOUNTANTS HEADACHE ACCOUNTING FOR VIRTUAL CURRENCIES TRANSACTIONS	#N/A	ISI	BUCHAREST UNIVERSITY OF ECONOMIC STUDIES	BUCHAREST UNIV ECON STUDIES	#N/A	PAUNESCU M, 2018, PROC INT C ACC	PAUNESCU M, 2018, PROC INT C ACC
PEDREÑO EP, 2021, INTANG CAP	PEDREÑO E; GELASHVILI V; NEBREDA L	PASCUAL PEDRENO, ELADIO; GELASHVILI, VERA; PASCUAL NEBREDA, LAURA	AGNESE P, 2021, INT J INTELLECTUAL P, V11, P81, DOI 10.1504/IJIPM.2021.113359, DOI 10.1504/IJIPM.2021.113359; AGRAWAL A, 2005, J LAW ECON, V48, P371, DOI 10.1086/430808; ALFARO M, 2018, DERECHO SOC, V11, P1; ANONYMOUS, 2002, HASHCASH A DENIAL SE; ANONYMOUS, 2016, BLOCKCH APPL BANK; ARJONA B, 2015, 17 C INT AECA C IL C; ARJONA B, 2012, CONTABILIDAD TRIANGU; ARROW K, 1972, PHILOS PUBLIC AFF, V1, P3…	PURPOSE: IN RECENT YEARS BITCOIN HAS REVOLUTIONIZED THE FINANCIAL WORLD. ITS BIRTH WAS MADE POSSIBLE THANKS TO AN INNOVATIVE COMBINATION OF CERTAIN PRE-EXISTING TECHNOLOGY IN COMPUTER NETWORKS AND CRYPTOGRAPHY, WHICH LED TO THE EXISTENCE OF A TRANSPARENT, RELIABLE AND IMMUTABLE RECORD OF TRANSACTIONS, A LARGE SHARED LEDGER: BLOCKCHAIN. SEVERAL STUDIES ANALYSE THE APPLICATION OR FUTURE APPLICATION…	#N/A	#N/A	UNIVERSITY EXTREMADAIA, BADAJOZ, SPAIN; KING JUAN CARLOS UNIVERSITY, MADRID, SPAIN;	BLOCKCHAIN; ACCOUNTING; DOUBLE ENTRY; TRIPLE-ENTRY ACCOUNTING	10.3926/ic.1522	ARTICLE	TECHNOLOGY	INTANG CAP	INTANG. CAP.	ENGLISH	OMNIASCIENCE	2021	PEDREÑO, EP (CORRESPONDING AUTHOR), UNIV EXTREMADAIA, BADAJOZ, SPAIN.	2014-3214	INTANGIBLE CAPITAL	8	BLOCKCHAIN AND ITS APPLICATION TO ACCOUNTING	17	ISI	UNIVERSIDAD REY JUAN CARLOS	UNIV EXTREMADAIA	#N/A	PEDREÑO EP, 2021, INTANG CAP	PEDREÑO EP, 2021, INTANG CAP
PELUCIO-GRECCO MC, 2020, REV CONTAB FINANC	PELUCIO-GRECCO M; DOS S; CONSTANCIO D	PELUCIO-GRECCO MARTA CRISTINA; DOS SANTOS NETO JACINTO PEDRO; CONSTANCIO DIEGO	none	THIS ESSAY PRESENTS RECOMMENDATIONS IN REGARD TO ACCOUNTING FOR OPERATIONS THAT INVOLVE BITCOINS, IN COMPLIANCE WITH THE INTERNATIONAL FINANCIAL REPORTING STANDARDS (IFRS), AND ANALYZES THEIR MAIN TAX ASPECTS. THERE IS NO SPECIFIC PRONOUNCEMENT ON THE PART OF THE INTERNATIONAL ACCOUNTING STANDARDS BOARD (IASB) OR FROM THE BRAZILIAN ACCOUNTING PRONOUNCEMENTS COMMITTEE (CPC) REGARDING THE ACCOUNTIN…	#N/A	#N/A	FACULDADE FIPECAFI, RUA MAESTRO CARDIM, BELA VISTA – SÃO PAULO – SP, 1170 - CEP 01323-001, BRAZIL;	BITCOIN; CRYPTOCURRENCY; IFRS; TAXATION	10.1590/1808-057x201909110	ARTICLE	#N/A	REV CONTAB FINANC	REV. CONTAB. FINANC.	ENGLISH	UNIVERSIDADE DE SAO PAULO. MUSEU DE ZOOLOGIA	2020	M.C. PELUCIO-GRECCO; FACULDADE FIPECAFI, BELA VISTA – SÃO PAULO – SP, RUA MAESTRO CARDIM, 1170 - CEP 01323-001, BRAZIL; EMAIL: MARTA.PELUCIO@FIPECAFI.ORG	15197077	REVISTA CONTABILIDADE E FINANCAS	2	ACCOUNTING FOR BITCOINS IN LIGHT OF IFRS AND TAX ASPECTS	31	ISI	FACULDADE FIPECAFI	NOTREPORTED;FACULDADE FIPECAFI;NOTREPORTED	#N/A	PELUCIO-GRECCO MC, 2020, REV CONTAB FINANC	PELUCIO-GRECCO MC, 2020, REV CONTAB FINANC
PFLUEGER D, 2022, EUR ACCOUNT REV	PFLUEGER D; KORNBERGER M; MOURITSEN J	PFLUEGER, DANE; KORNBERGER, MARTIN; MOURITSEN, JAN	ACHAIN WHITEPAPER, 2019, ACHAIN WHITEPAPER; ANONYMOUS, 2017, BYTOM WHITE PAPER; ANONYMOUS, 2018, BEATZCOIN WHITEPAPER; ANONYMOUS, RIPPLE PROTOCOL CONS; ANONYMOUS, 2018, 8GIG WHITE PAPER; ANONYMOUS, 2018, BLOCKSTATE WHITEPAPE; ANONYMOUS, 2018, AUXLEDGER WHITE PAPE; ANONYMOUS, 2017, ASCH WHITEPAPER; ANONYMOUS, 2018, AMBROSUS WHITE PAPER; ANONYMOUS, 2016, BLOCKCHAIN TECHNOLOGY: A GAME-CHANGER IN ACC…	ACROSS INDUSTRY AND ACADEMIA, THERE IS CURRENTLY MUCH DISCUSSION ABOUT THE IMPLICATIONS OF BLOCKCHAIN FOR ACCOUNTING. WE CONTRIBUTE TO THESE ONGOING DISCUSSIONS BY CRITICALLY INVESTIGATING THE CLAIM THAT BLOCKCHAIN EXISTS AS A NOVEL AND FOUNDATIONAL ACCOUNTING TECHNOLOGY. WE DO SO BY EXAMINING THE CENTRAL IMAGINARIES ASSOCIATED WITH BLOCKCHAIN AND INVESTIGATING THEIR INCOMPLETE CRYSTALLISATIONS I…	#N/A	#N/A	HEC PARIS, DEPT ACCOUNTING & MANAGEMENT CONTROL, JOUY EN JOSAS, FRANCE; VIENNA UNIVERSITY ECON & BUSINESS, VIENNA, AUSTRIA; STOCKHOLM SCH ECON, STOCKHOLM, SWEDEN; COPENHAGEN BUSINESS SCH, COPENHAGEN, DENMARK; HEC PARIS, DEPT ACCOUNTING & MANAGEMENT CONTROL, 1 RUE LIBERAT, F- 78351 JOUY EN JOSAS, FRANCE;	ALGORITHM; DIGITALIZATION; BLOCKCHAIN; GOVERNANCE; TRUST; ORGANIZATION	10.1080/09638180.2022.2147973	ARTICLE; EARLY ACCESS	SOCIAL MEDIA; SUPPLY CHAIN; BIG DATA; HISTORY; ACCOUNTABILITY; TECHNOLOGIES; CAPITALISM; TRANSITION; RANKINGS; POLITICS	EUR ACCOUNT REV	EUR. ACCOUNT. REV.	ENGLISH	ROUTLEDGE JOURNALS, TAYLOR & FRANCIS LTD	2022	PFLUEGER, D (CORRESPONDING AUTHOR), HEC PARIS, DEPT ACCOUNTING & MANAGEMENT CONTROL, 1 RUE LIBERAT, F- 78351 JOUY EN JOSAS, FRANCE.	0963-8180	EUROPEAN ACCOUNTING REVIEW	2	WHAT IS BLOCKCHAIN ACCOUNTING A CRITICAL EXAMINATION IN RELATION TO ORGANIZING GOVERNANCE AND TRUST	#N/A	ISI	HAUTES ETUDES COMMERCIALES (HEC) PARIS; VIENNA UNIVERSITY OF ECONOMICS AND BUSINESS; STOCKHOLM SCHOOL OF ECONOMICS; COPENHAGEN BUSINESS SCHOOL; HAUTES ETUDES COMMERCIALES (HEC) PARIS	D (CORRESPONDING AUTHOR)	#N/A	PFLUEGER D, 2022, EUR ACCOUNT REV	PFLUEGER D, 2022, EUR ACCOUNT REV
PIETERS G, 2017, INF ECON POLICY	PIETERS G; VIVANCO S	PIETERS, GINA; VIVANCO, SOFIA	AKRAM Q, 2008, J INT ECON, V76, P237, DOI 10.1016/J.JINTECO.2008.07.004; ALI R, 2014, BANK ENGLAND Q B; BADEV A, 2014, FRB FINANCE EC DISCU, P104; BÖHME R, 2015, J ECON PERSPECT, V29, P213, DOI 10.1257/JEP.29.2.213; BRANDVOLD M, 2015, J INT FINANC MARK I, V36, P18, DOI 10.1016/J.INTFIN.2015.02.010; BRIÈRE M, 2015, J ASSET MANAG, V16, P365, DOI 10.1057/JAM.2015.5; CHU J, 2015, PLOS ONE, V10, DOI 1…	WE DOCUMENT SIGNIFICANT DIFFERENCES IN BITCOIN PRICES ACROSS 11 DIFFERENT MARKETS REPRESENTING 26% OF GLOBAL BITCOIN TRADE VOLUME. THESE DIFFERENCES MUST DUE TO THE IDENTICAL NATURE OF ALL BITCOIN-RESULT FROM CHARACTERISTICS OF MARKETS THEMSELVES. WE EXAMINE DIFFERENCES ACROSS THE MARKETS AND FIND THAT THOSE WHICH DO NOT REQUIRE CUSTOMER IDENTIFICATION FOR ESTABLISHING AN ACCOUNT ARE MORE LIKELY …	#N/A	#N/A	TRINITY UNIVERSITY, DEPT ECON, 1 TRINITY PL, SAN ANTONIO, TX 78212, USA;	BITCOIN; ARBITRAGE; CRYPTOCURRENCY; FINANCIAL REGULATION	10.1016/j.infoecopol.2017.02.002	ARTICLE	ECONOMICS; DISCOVERY	INF ECON POLICY	INF. ECON. POLICY	ENGLISH	ELSEVIER	2017	PIETERS, G (CORRESPONDING AUTHOR), TRINITY UNIV, DEPT ECON, 1 TRINITY PL, SAN ANTONIO, TX 78212 USA.	0167-6245	INFORMATION ECONOMICS AND POLICY	93	FINANCIAL REGULATIONS AND PRICE INCONSISTENCIES ACROSS BITCOIN MARKETS	39	ISI	TRINITY UNIVERSITY	TRINITY UNIV	#N/A	PIETERS G, 2017, INF ECON POLICY	PIETERS G, 2017, INF ECON POLICY
PIMENTEL E, 2020, ACCOUNT PERSPECT	PIMENTEL E; BOULIANNE E	PIMENTEL, ERICA; BOULIANNE, EMILIO	ADHAMI S, 2018, J ECON BUS, V100, P64, DOI 10.1016/J.JECONBUS.2018.04.001; ANONYMOUS, 2016, BLOCKCH TECHN GAM CH; ANONYMOUS, 2018, BLOCKCHAIN AND THE FUTURE OF ACCOUNTANCY; ASSOCIATION OF CHARTERED CERTIFIED ACCOUNTANTS (ACCA) AND CPA CANADA, 2017, DIV WE FALL DISTR WE; ATKINSON A, 1997, SLOAN MANAGE REV, V38, P25; BAJWA N, 2020, J CORP ACCOUNT FINAN, V31, P54, DOI 10.1002/JCAF.22423; BELINKY M, …	THIS ARTICLE PROVIDES A REVIEW OF THE ACCOUNTING BLOCKCHAIN LITERATURE, WITH A FOCUS ON CURRENT TRENDS AND RECOMMENDATIONS FOR FUTURE RESEARCH OPPORTUNITIES. OUR REVIEW IDENTIFIES SEVEN MAIN AREAS: (I) FUTURE OF BLOCKCHAIN TECHNOLOGY, (II) IMPACT ON THE ACCOUNTING FUNCTION, (III) AUDITING CONSIDERATIONS, (IV) FINANCIAL REPORTING FOR CRYPTOASSETS, (V) CASE STUDIES, (VI) GOVERNANCE, AND (VII) TAXAT…	#N/A	#N/A	CONCORDIA UNIVERSITY, JOHN MOLSON SCH BUSINESS, MONTREAL, PQ, CANADA;	BLOCKCHAIN; ACCOUNTING; AUDITING; GOVERNANCE; TAXATION	10.1111/1911-3838.12239	ARTICLE	TECHNOLOGY; INFORMATION; BITCOIN; CHALLENGES; LEDGERS; AUDIT	ACCOUNT PERSPECT	ACCOUNT. PERSPECT.	ENGLISH	WILEY	2020	PIMENTEL, E (CORRESPONDING AUTHOR), CONCORDIA UNIV, JOHN MOLSON SCH BUSINESS, MONTREAL, PQ, CANADA.	1911-382X	ACCOUNTING PERSPECTIVES	42	BLOCKCHAIN IN ACCOUNTING RESEARCH AND PRACTICE CURRENT TRENDS AND FUTURE OPPORTUNITIES	19	ISI	CONCORDIA UNIVERSITY	CONCORDIA UNIV	#N/A	PIMENTEL E, 2020, ACCOUNT PERSPECT	PIMENTEL E, 2020, ACCOUNT PERSPECT
PIMENTEL E, 2021, J INF SYST	PIMENTEL E; BOULIANNE E; ESKANDARI S; CLARK J	PIMENTEL, ERICA; BOULIANNE, EMILIO; ESKANDARI, SHAYAN; CLARK, JEREMY	ABREU P, 2018, IBER CONF INF SYST; ASSOCIATION OF INTERNATIONAL CERTIFIED PROFESSIONAL ACCOUNTANTS (AICPA), 2020, BLOCKCH DISTR LEDG T; BAUER T, 2019, CONTEMP ACCOUNT RES, V36, P2142, DOI 10.1111/1911-3846.12490; BDO, 2019, 3 PART ASS; BROBY D, 2017, J FINANC TRANSFORM, V46, P76; CARTER C, 2014, CONTEMP ACCOUNT RES, V31, P949, DOI 10.1111/1911-3846.12059; CATALINI C, 2016, NBER WORKING PAPER S, V…	PRESENTLY, AUDITING FIRMS ARE HESITANT TO ACCEPT MANDATES FROM COMPANIES THAT HOLD A SIGNIFICANT AMOUNT OF CRYPTOASSETS, PRIMARILY BECAUSE THE BLOCKCHAIN SECTOR INTRODUCES NOVEL, TECHNICALLY SOPHISTICATED, AND RISKY PROPOSITIONS THAT AUDITORS ARE UNEQUIPPED TO HANDLE. ABRUPT RECUSALS BY AUDITORS OPERATING IN THIS SECTOR HAVE LED TO SEVERAL ENTERPRISES BEING PLACED ON CEASE TRADE BY SECURITIES REG…	#N/A	#N/A	QUEENS UNIVERSITY, SMITH SCH BUSINESS, KINGSTON, ON, CANADA; CONCORDIA UNIVERSITY, JOHN MOLSON SCH BUSINESS, DEPT ACCOUNTANCY, MONTREAL, PQ, CANADA; CONCORDIA UNIVERSITY, GINA CODY SCH ENGN, CONCORDIA INST INFORMAT SYST ENGN, MONTREAL, PQ, CANADA;	BLOCKCHAIN; AUDITING; CRYPTO ASSETS; ACCOUNTING FIRMS; AUDITORS; CRYPTOCURRENCY	10.2308/ISYS-19-007	ARTICLE	#N/A	J INF SYST	J. INF. SYST.	ENGLISH	AMER ACCOUNTING ASSOC	2021	PIMENTEL, E (CORRESPONDING AUTHOR), QUEENS UNIV, SMITH SCH BUSINESS, KINGSTON, ON, CANADA.	0888-7985	JOURNAL OF INFORMATION SYSTEMS	13	SYSTEMIZING THE CHALLENGES OF AUDITING BLOCKCHAINBASED ASSETS	35	ISI	QUEENS UNIVERSITY ; CONCORDIA UNIVERSITY ; CONCORDIA UNIVERSITY	QUEENS UNIV	#N/A	PIMENTEL E, 2021, J INF SYST	PIMENTEL E, 2021, J INF SYST
PROCHÁZKA D, 2018, INT J DIGIT ACCOUNT RES	PROCHÁZKA D	PROCHÁZKA DAVID	none	THE INVENTION OF BLOCKCHAIN TECHNOLOGY HAS RADICALLY CHANGED THE PERCEPTION OF HOW MONETARY SYSTEMS CAN BE STRUCTURED AND OPERATED. CENTRAL BANKS AND STATE AUTHORITIES MOSTLY REFUSE TO ACKNOWLEDGE THAT CRYPTOCURRENCIES ARE MONEY, YET THE NUMBER OF PAYMENT TRANSACTIONS USING CRYPTOCURRENCIES IS INCREASING AND CRYPTOCURRENCIES FORM A NON-NEGLIGIBLE STAKE OF WEALTH. AS WITH OTHER ECONOMIC PHENOMENA,…	#N/A	#N/A	UNIVERSITY OF ECONOMICS IN PRAGUE, CZECH REPUBLIC;	ACCOUNTING; BITCOIN; CRYPTOCURRENCY; FAIR VALUE; IFRS; VOLATILITY	10.4192/1577-8517-v18_7	ARTICLE	#N/A	INT J DIGIT ACCOUNT RES	INT. J. DIGIT. ACCOUNT. RES.	ENGLISH	UNIVERSIDAD DE HUELVA	2018	D. PROCHÁZKA; UNIVERSITY OF ECONOMICS IN PRAGUE, CZECH REPUBLIC; EMAIL: PROCHAZD@VSE.CZ	15778517	INTERNATIONAL JOURNAL OF DIGITAL ACCOUNTING RESEARCH	35	ACCOUNTING FOR BITCOIN AND OTHER CRYPTOCURRENCIES UNDER IFRS A COMPARISON AND ASSESSMENT OF COMPETING MODELS	18	ISI	UNIVERSITY OF ECONOMICS IN PRAGUE	NOTREPORTED;UNIVERSITY OF ECONOMICS IN PRAGUE;NOTREPORTED	#N/A	PROCHÁZKA D, 2018, INT J DIGIT ACCOUNT RES	PROCHÁZKA D, 2018, INT J DIGIT ACCOUNT RES
PROCHÁZKA D, 2019, SPRINGER PROC BUS ECON	PROCHÁZKA D	PROCHÁZKA DAVID	none	THE RISE OF CRYPTOCURRENCIES RAISES ALSO QUESTION OF HOW TO ACCOUNT FOR THEM. THE PAPER FOCUSES ON TWO COMMON SITUATIONS WHEN FIRMS DEAL WITH CRYPTOCURRENCIES—RECEIVING CRYPTOCURRENCIES AS A MEANS OF PAYMENT OR ACQUIRING CRYPTOCURRENCIES FOR INVESTMENT PURPOSES. USING EMPIRICAL EVIDENCE FROM ECONOMIC LITERATURE, THE PAPER DISCUSSES THE PROPERTIES OF CRYPTOCURRENCIES AS CASH AND AS AN INVESTMENT A…	PROCHÁZKA D.	978-303011850-1	UNIVERSITY OF ECONOMICS PRAGUE, DEPARTMENT OF FINANCIAL ACCOUNTING AND AUDITING, NAM. W. CHURCHILLA 4, PRAGUE, 130 67, CZECH REPUBLIC;	BITCOIN; CRYPTOCURRENCY; FAIR VALUE; IFRS	10.1007/978-3-030-11851-8_21	CONFERENCE PAPER	#N/A	SPRINGER PROC BUS ECON	SPRINGER PROC. BUS. ECON.	ENGLISH	SPRINGER SCIENCE AND BUSINESS MEDIA B.V.	2019	D. PROCHÁZKA; DEPARTMENT OF FINANCIAL ACCOUNTING AND AUDITING, UNIVERSITY OF ECONOMICS PRAGUE, PRAGUE, NAM. W. CHURCHILLA 4, 130 67, CZECH REPUBLIC; EMAIL: PROCHAZD@VSE.CZ	21987246	SPRINGER PROCEEDINGS IN BUSINESS AND ECONOMICS	1	IS BITCOIN A CURRENCY OR AN INVESTMENT AN IFRS VIEW	#N/A	ISI	UNIVERSITY OF ECONOMICS PRAGUE	NOTREPORTED;UNIVERSITY OF ECONOMICS PRAGUE;NOTREPORTED	#N/A	PROCHÁZKA D, 2019, SPRINGER PROC BUS ECON	PROCHÁZKA D, 2019, SPRINGER PROC BUS ECON
PROELSS J, 2024, EUR FINANC MANAG	PROELSS J; SCHWEIZER D; SEVIGNY S	PROELSS, JULIANE; SCHWEIZER, DENIS; SEVIGNY, STEPHANE	ADERINOKUN I, 2022, LETT SUPPORT RESPONS; ANONYMOUS, 2022, ELECTRICITY MARKET REPORT - JANUARY 2022; ANONYMOUS, 2021, THE ECONOMIST.; AOYAGI J, 2019, EMPIRICAL ANAL BITCO; APPALACHIAN REGION INDEPENDENT POWER PRODUCERS ASSOCIATION (ARIPPA), 2015, COAL REF WHIT; BENGTSSON E, 2023, EUR FINANC MANAG, V29, P150, DOI 10.1111/EUFM.12399; BEVAND M, 2017, ELECT CONSUMPTION BI; BITFARMS, 2022, 4 QUARTER; …	MUCH OF THE MEDIA FOCUS SURROUNDING BITCOIN (BTC) HAS BEEN ON THE 'E' (ENVIRONMENTAL) ELEMENT OF THE ESG INVESTING APPROACH. GIVEN THE AMOUNT OF ELECTRICITY CONSUMED BY BTC MINING, AND THE RESULTING LARGE CARBON EMISSIONS, BTC HAS FACED SUBSTANTIAL CRITICISM OF ITS OVERLY NEGATIVE ENVIRONMENTAL IMPACT, WHICH IS CRITICALLY REVIEWED IN THIS ARTICLE. THIS ONE-SIDED DISCUSSION, HOWEVER, IGNORES THE '…	#N/A	#N/A	CONCORDIA UNIVERSITY, JOHN MOLSON SCH BUSINESS, DEPT FINANCE, MONTREAL, PQ, CANADA; CONCORDIA UNIVERSITY, JOHN MOLSON SCH BUSINESS, DEPT FINANCE, 1455 MAISONNEUVE BLVD WEST, MONTREAL, PQ H3G 1M8, CANADA;	BITCOIN; CARBON EMISSIONS; CLIMATE; CRYPTO; ENVIRONMENTAL; ESG; SUSTAINABILITY; SUSTAINABLE DEVELOPMENT GOALS	10.1111/eufm.12451	ARTICLE	UNIT-ROOT; CRYPTOCURRENCY; PRICES	EUR FINANC MANAG	EUR. FINANC. MANAG.	ENGLISH	WILEY	2024	SCHWEIZER, D (CORRESPONDING AUTHOR), CONCORDIA UNIV, JOHN MOLSON SCH BUSINESS, DEPT FINANCE, 1455 MAISONNEUVE BLVD WEST, MONTREAL, PQ H3G 1M8, CANADA.	1354-7798	EUROPEAN FINANCIAL MANAGEMENT	1	IS BITCOIN ESGCOMPLIANT A SOBER LOOK	30	ISI	CONCORDIA UNIVERSITY ; CONCORDIA UNIVERSITY	CONCORDIA UNIV	#N/A	PROELSS J, 2024, EUR FINANC MANAG	PROELSS J, 2024, EUR FINANC MANAG
RAIBORN C, 2015, J CORP ACCOUNT FINAN	RAIBORN C; SIVITANIDES M	RAIBORN, CECILY; SIVITANIDES, MARCOS	ABRAMS R, 2014, AUSTIN AM STATE 0322, PB7; ANONYMOUS, 2013, FEDERAL REGULATORS T; ANONYMOUS, US AGENCIES SAY BITC; ASSOCIATED PRESS (AP), 2014, OV COM SEES NEW MARK; BLOOMBERG TV, 2014, BLOCKCHAIN BUY BITCO; CHANDRA U, 2006, ACCOUNT HORIZ, V20, P231; DETRIXHE J, 2014, BITCOIN MAY HAVE FUT; DETRIXHE J, 2014, WALL STREET SEES BIT; DURDEN T, 2013, BITCOIN DERIVATIVES; FERNHOLZ T, 2013, MINERS SPEND …	DESPITE THE FREQUENT MENTION OF BITCOIN IN RECENT YEARS IN THE PRESS AND BUSINESS PUBLICATIONS, MANY PEOPLE ARE STILL UNCERTAIN WHAT THIS CRYPTO-CURRENCY IS OR HOW IT WORKS. AND ALTHOUGH BITCOINS (BTCS) ARE NOW AN ACCEPTED MEDIUM OF EXCHANGE FOR SOME BUSINESSES AND NOT-FOR-PROFIT ORGANIZATIONS, NO SPECIFIC ACCOUNTING GUIDANCE HAS BEEN ISSUED FOR THESE TRANSACTIONS. THIS ARTICLE PROVIDES SOME BASI…	#N/A	#N/A	TEXAS STATE UNIVERSITY, ACCOUNTING, SAN MARCOS, TX 78666, USA; TEXAS STATE UNIVERSITY, COMP INFORMAT SYST, SAN MARCOS, TX, USA;	ACCOUNTING; BITCOIN; CRYPTOCURRENCY	10.1002/jcaf.22016	ARTICLE	#N/A	J CORP ACCOUNT FINAN	J. CORP. ACCOUNT. FINANC.	ENGLISH	WILEY PERIODICALS, INC	2015	RAIBORN, C (CORRESPONDING AUTHOR), TEXAS STATE UNIV, ACCOUNTING, SAN MARCOS, TX 78666 USA.	1044-8136	JOURNAL OF CORPORATE ACCOUNTING AND FINANCE	21	ACCOUNTING ISSUES RELATED TO BITCOINS	26	ISI	TEXAS STATE UNIVERSITY SYSTEM; TEXAS STATE UNIVERSITY SAN MARCOS; TEXAS STATE UNIVERSITY SYSTEM; TEXAS STATE UNIVERSITY SAN MARCOS	TEXAS STATE UNIV	#N/A	RAIBORN C, 2015, J CORP ACCOUNT FINAN	RAIBORN C, 2015, J CORP ACCOUNT FINAN
RAM A, 2016, MEDITARI ACCOUNT RES	RAM A; MAROUN W; GARNETT R	RAM, ASHEER; MAROUN, WARREN; GARNETT, ROBERT	ANONYMOUS, MICHIGAN LAW REV 1 I; ANONYMOUS, 2010, BUSINESS MODELS IN ACCOUNTING: THE THEORY OF THE FIRM AND FINANCIAL REPORTING; ANONYMOUS, 2014, STORE YOUR DAIRY; ANONYMOUS, BITCOIN CURRENCY FUT; ANONYMOUS, WHAT IS BITC MIN; ANONYMOUS, ACCOUNTING FORUM; ANONYMOUS, EUROPEAN TAXATION; ANONYMOUS, FRAMEWORK BASED TEAC; ANONYMOUS, SETTING THE AGENDA; ANONYMOUS, ONCE YOU USE BITCOIN; ANONYMOUS, THE DA…	PURPOSE - GIVEN ITS INNOVATIVE CHARACTERISTICS AND INCREASING POPULARITY, THE BITCOIN, AND OTHER VIRTUAL CURRENCIES, ARE EXPECTED TO BECOME MAINSTREAM, LEADING TO THE NEED FOR A GENERALLY ACCEPTED ACCOUNTING TREATMENT. CURRENTLY, HOWEVER, THERE ARE NO ACCOUNTING STANDARDS WHICH OFFER GUIDANCE ON THE RECOGNITION AND MEASUREMENT OF THESE VIRTUAL CURRENCIES. TO THIS END, THE PURPOSE OF THIS PAPER IS…	#N/A	#N/A	UNIVERSITY WITWATERSRAND, SCH ACCOUNTING, JOHANNESBURG, SOUTH AFRICA;	NEOLIBERALISM; STEWARDSHIP; FINANCIAL REPORTING; CORRESPONDENCE ANALYSIS; BITCOIN; VIRTUAL CURRENCY	10.1108/MEDAR-07-2015-0035	ARTICLE	E-COMMERCE; QUALITATIVE DATA	MEDITARI ACCOUNT RES	MEDITARI ACCOUNT. RES.	ENGLISH	EMERALD GROUP PUBLISHING LTD	2016	MAROUN, W (CORRESPONDING AUTHOR), UNIV WITWATERSRAND, SCH ACCOUNTING, JOHANNESBURG, SOUTH AFRICA.	2049-372X	MEDITARI ACCOUNTANCY RESEARCH	24	ACCOUNTING FOR THE BITCOIN ACCOUNTABILITY NEOLIBERALISM AND A CORRESPONDENCE ANALYSIS	24	ISI	UNIVERSITY OF WITWATERSRAND	UNIV WITWATERSRAND	#N/A	RAM A, 2016, MEDITARI ACCOUNT RES	RAM A, 2016, MEDITARI ACCOUNT RES
RAMASSA P, 2022, ACCOUNT AUDIT ACCOUN	RAMASSA P; LEONI G	RAMASSA, PAOLA; LEONI, GIULIA	ANONYMOUS, 2013, EUROPEAN TAXATION; ANONYMOUS, 2018, CONC FRAM FIN REP; ARTIACH T, 2016, ACCOUNT AUDIT ACCOUN, V29, P802, DOI 10.1108/AAAJ-10-2014-1850; BAUDOT L, 2014, ROUTL COMPANION BUS, P207; BERNSTEIN M, 1955, REGULATING BUSINESS BY INDEPENDENT COMMISSION; BHIMANI A, 2019, J ACCOUNT PUBLIC POL, V38, P65, DOI 10.1016/J.JACCPUBPOL.2019.02.004; BOTZEM S, 2012, POLITICS OF ACCOUNTING REGULATION:…	PURPOSE THIS PAPER EXPLORES HOW THE INTERNATIONAL ACCOUNTING STANDARDS BOARD (IASB) HAS DEALT WITH THE EMERGING ISSUE OF ACCOUNTING FOR CRYPTOCURRENCIES BY INVESTIGATING ITS CONSTITUENTS' EXPECTATIONS AND THE MOTIVATIONS UNDERLYING ITS REGULATORY RESPONSE. DESIGN/METHODOLOGY/APPROACH THE THEORETICAL LENS OF REGULATORY SPACE IS USED TO ANALYSE THE FOUR-YEAR DEBATE AROUND CRYPTOCURRENCY HOLDINGS AN…	#N/A	#N/A	UNIVERSITY GENOA, DEPT ECON & BUSINESS STUDIES, GENOA, ITALY;	ACCOUNTING REGULATION; CRYPTOCURRENCY; BLOCKCHAIN; IFRS; IASB	10.1108/AAAJ-10-2020-4968	ARTICLE	STRATEGIC RESPONSES; REGULATORY SPACE; BITCOIN; AGENDA; IASBS; PARTICIPATION; ACCOUNTABILITY; CONSTRUCTION; LEGITIMACY; BLOCKCHAIN	ACCOUNT AUDIT ACCOUN	ACCOUNT. AUDIT ACCOUNT.	ENGLISH	EMERALD GROUP PUBLISHING LTD	2022	RAMASSA, P (CORRESPONDING AUTHOR), UNIV GENOA, DEPT ECON & BUSINESS STUDIES, GENOA, ITALY.	0951-3574	ACCOUNTING AUDITING & ACCOUNTABILITY JOURNAL	11	STANDARD SETTING IN TIMES OF TECHNOLOGICAL CHANGE ACCOUNTING FOR CRYPTOCURRENCY HOLDINGS	35	ISI	UNIVERSITY OF GENOA	UNIV GENOA	#N/A	RAMASSA P, 2022, ACCOUNT AUDIT ACCOUN	RAMASSA P, 2022, ACCOUNT AUDIT ACCOUN
RANA T, 2023, HANDBOOK OF BIG DATA AND ANALYTICS IN ACCOUNTING AND AUDITING	RANA T; SVANBERG J; ÖHMAN P; LOWE A	RANA, TAREK; SVANBERG, JAN; OHMAN, PETER; LOWE, ALAN	CANNING M, 2019, ACCOUNT BUS RES, V49, P1, DOI 10.1080/00014788.2018.1442208; CHATTERJI A, 2016, STRATEGIC MANAGE J, V37, P1597, DOI 10.1002/SMJ.2407; CHRISTENSEN D, 2022, ACCOUNT REV, V97, P147, DOI 10.2308/TAR-2019-0506; ISSA H, 2014, J INF SYST, V28, P209, DOI 10.2308/ISYS-50808; LUNDBERG S, 2017, ADV NEUR IN, V30; SALIJENI G, 2021, EUR ACCOUNT REV, V30, P531, DOI 10.1080/09638180.2021.1882320…	BIG DATA AND ANALYTICS OFFER NEW OPPORTUNITIES AND CHALLENGES FOR ACADEMICS AND PRACTITIONERS IN ALL BUSINESS DISCIPLINES INCLUDING ACCOUNTING AND AUDITING. IN THE BACKDROP OF INCREASING GROWTH OF EMERGING TECHNOLOGIES, THE ORGANIZATIONS IN PUBLIC, PRIVATE AND NOT-FOR-PROFIT SECTORS ARE EMBRACING DIGITAL ECONOMY AND THE FOURTH INDUSTRIAL REVOLUTION JOURNEY. THIS REQUIRES KNOWLEDGE OF BETTER PRACT…	RANA, T SVANBERG, J OHMAN, P LOWE, A	978-981-19-4462-8; 978-981-19-4460-4; 978-981-19-4459-8	RMIT UNIVERSITY, MANAGEMENT ACCOUNTING & ANALYT, MELBOURNE, VIC, AUSTRALIA; RMIT UNIVERSITY, MANAGEMENT ACCOUNTING, MELBOURNE, VIC, AUSTRALIA; GAVLE UNIV, GAVLE, SWEDEN; CTR RES ECON RELAT, GAVLE, SWEDEN; MID SWEDEN UNIV, CTR RES ECON RELAT, SUNDSVALL, SWEDEN;	BIG DATA; ANALYTICS; ARTIFICIAL INTELLIGENCE; MACHINE LEARNING; DIGITAL ECONOMY; ACCOUNTING; AUDITING	10.1007/978-981-19-4460-4_1	ARTICLE; BOOK CHAPTER	#N/A	HANDBOOK OF BIG DATA AND ANALYTICS IN ACCOUNTING AND AUDITING	#N/A	ENGLISH	SPRINGER-VERLAG SINGAPORE PTE LTD	2023	SVANBERG, J (CORRESPONDING AUTHOR), GAVLE UNIV, GAVLE, SWEDEN.; SVANBERG, J (CORRESPONDING AUTHOR), CTR RES ECON RELAT, GAVLE, SWEDEN.	#N/A	HANDBOOK OF BIG DATA AND ANALYTICS IN ACCOUNTING AND AUDITING	0	INTRODUCTION ANALYTICS IN ACCOUNTING AND AUDITING	#N/A	ISI	MELBOURNE GENOMICS HEALTH ALLIANCE; ROYAL MELBOURNE INSTITUTE OF TECHNOLOGY (RMIT); ROYAL MELBOURNE INSTITUTE OF TECHNOLOGY (RMIT); MELBOURNE GENOMICS HEALTH ALLIANCE; UNIVERSITY OF GAVLE; MID-SWEDEN UNIVERSITY	GAVLE UNIV;CTR RES ECON RELAT	#N/A	RANA T, 2023, HANDBOOK OF BIG DATA AND ANALYTICS IN ACCOUNTING AND AUDITING	RANA T, 2023, HANDBOOK OF BIG DATA AND ANALYTICS IN ACCOUNTING AND AUDITING
REEPU R, 2019, INT J MANAG	REEPU R	REEPU	none	AT PRESENT TIMES, THERE HAS BEEN A SURGE IN CRYPTOPIANS COMMUNITY. SINCE WEALTH MAXIMIZATION IS THE AIM OF MANY, THE VIRTUAL CURRENCY HAS BECOME ONE OF THE IMPORTANT INVESTMENT AVENUES. VIRTUAL CURRENCY LIKE BITCOINS HAVE BECOME GRILL FOR THE GOSSIP MILL. CONSUMER ENJOYS SOVEREIGNTY. THE PRESENT PAPER PROVIDES INSIGHT OF THE BEHIND THE SCENE TECHNOLOGY IN ORDER TO ATTAIN BETTER UNDERSTANDING OF T…	#N/A	#N/A	CHANDIGARH UNIVERSITY, UNIVERSITY SCHOOL OF BUSINESS, GHARUAN, INDIA;	BITCOIN; BLOCKCHAIN; CRYPTOPIANS	10.34218/IJM.10.1.2019/003	ARTICLE	#N/A	INT J MANAG	INT. J. MANAG.	ENGLISH	IAEME PUBLICATION	2019	#N/A	09766502	INTERNATIONAL JOURNAL OF MANAGEMENT	7	BLOCKCHAIN SOCIAL INNOVATION IN FINANCE ACCOUNTING	10	ISI	UNIVERSITY SCHOOL OF BUSINESS	UNIVERSITY SCHOOL OF BUSINESS	#N/A	REEPU R, 2019, INT J MANAG	REEPU R, 2019, INT J MANAG
RELLA L, 2020, J CULT ECON-UK	RELLA L	RELLA, LUDOVICO	ALLEN J, 1999, ENVIRON PLANN D, V17, P51, DOI 10.1068/D170051; ALLISON I, 2018, COINDESK; AMATO M, 2018, HDB HIST MONEY CURRE, P1; AMIN A, 2014, THEOR CULT SOC, V31, P137, DOI 10.1177/0263276414548490; ANONYMOUS, DISTR LEDG TECHN PAY; ANONYMOUS, 2019, BLOCKCHAIN EC IMPLIC, PI0004; BANCO S, 2018, SANT LAUNCH 1 BLOCKC; BANK OF ENGLAND, 2017, RIPPL EXPL SYNCHR SE;BATESON G., 1971, STEPS ECOLOGY MIND…	MONEY'S MATERIALITY PRODUCES AN ONTOLOGICAL CONUNDRUM FOR SOCIAL THEORY: SHOULD THE ANALYSIS OF MONEY FOREGROUND THE OBJECTS USED AS MONEY, OR THE ABSTRACT RELATIONS THAT UNDERPIN IT? PROVOKED BY THE EMERGENCE OF CRYPTOCURRENCIES, THIS PAPER DEVELOPS A CONCEPTUALIZATION OF MONEY AS A TECHNOLOGICAL AND SOCIAL INFRASTRUCTURE WHICH DIRECTLY ADDRESSES THIS THEORETICAL IMPASSE. CRYPTOCURRENCIES' SOLE …	#N/A	#N/A	UNIVERSITY DURHAM, DEPT GEOG, SOUTH RD, DURHAM DH1 3LE, UNITED KINGDOM;	MONEY; INFRASTRUCTURE; ECOLOGY; PAYMENTS; CRYPTOCURRENCY	10.1080/17530350.2020.1711532	ARTICLE	POLITICAL-ECONOMY; BLOCKCHAIN	J CULT ECON-UK	J. CULT. ECON.	ENGLISH	ROUTLEDGE JOURNALS, TAYLOR & FRANCIS LTD	2020	RELLA, L (CORRESPONDING AUTHOR), UNIV DURHAM, DEPT GEOG, SOUTH RD, DURHAM DH1 3LE, ENGLAND.	1753-0350	JOURNAL OF CULTURAL ECONOMY	26	STEPS TOWARDS AN ECOLOGY OF MONEY INFRASTRUCTURES MATERIALITY AND CULTURES OF RIPPLE	13	ISI	DURHAM UNIVERSITY	UNIV DURHAM	#N/A	RELLA L, 2020, J CULT ECON-UK	RELLA L, 2020, J CULT ECON-UK
SALAWU MK, 2018, ACAD ACCOUNT FINANC STUD J	SALAWU M; MOLOI T	SALAWU MARY KEHINDE; MOLOI TANKISO	none	THIS STUDY WAS UNDERTAKEN TO ASCERTAIN THE VIEW OF NIGERIAN PROFESSIONAL ACCOUNTANTS TOWARDS LEGISLATING CRYPTOCURRENCY IN NIGERIA. IT ALSO EXAMINED FOUR OF THE OSTENSIBLE BENEFITS WHICH AT THE SAME TIME CONSTITUTE RISKS, FROM THE LEGISLATION OF CRYPTOCURRENCY. QUANTITATIVE DATA WERE SOURCED FROM THE RESPONDENTS THROUGH THE ADMINISTRATION OF A STRUCTURED QUESTIONNAIRE. THE POPULATION FOR THE STUD…	#N/A	#N/A	UNIVERSITY OF JOHANNESBURG, SOUTH AFRICA;	BITCOIN; CRYPTOCURRENCY; LEGISLATION; PROFESSIONAL ACCOUNTANTS	#N/A	ARTICLE	#N/A	ACAD ACCOUNT FINANC STUD J	ACAD. ACCOUNT. FINANC. STUD. J.	ENGLISH	ALLIED BUSINESS ACADEMIES	2018	#N/A	10963685	ACADEMY OF ACCOUNTING AND FINANCIAL STUDIES JOURNAL	5	BENEFITS OF LEGISLATING CRYPTOCURRENCIES PERCEPTION OF NIGERIAN PROFESSIONAL ACCOUNTANTS	22	ISI	UNIVERSITY OF JOHANNESBURG	UNIVERSITY OF JOHANNESBURG	#N/A	SALAWU MK, 2018, ACAD ACCOUNT FINANC STUD J	SALAWU MK, 2018, ACAD ACCOUNT FINANC STUD J
SARWAR MI, 2023, LEDGER-PITTSBURGH	SARWAR M; NISAR K; KHAN I; SHEHZAD D	SARWAR, MUHAMMAD IMRAN; NISAR, KASHIF; KHAN, IMRAN; SHEHZAD, DANISH	ANONYMOUS, 2021, PACIO WHITE PAPER; BASU S, 2021, SSRN ELECT J, DOI 10.2139/SSRN.3093303, DOI 10.2139/SSRN.3093303; BENDOVSCHI A, 2011, DIGITAL ACCOUNTING, VIII, P91; BONSÓN E, 2019, MEDITARI ACCOUNT RES, V27, P725, DOI 10.1108/MEDAR-11-2018-0406; BUTERIN V, 2014, ETHEREUM WHITEPAPER; CAI C, 2021, ACCOUNT FINANC, V61, P71, DOI 10.1111/ACFI.12556; CAPACTIX, 2021, UND DOUBL ENTR TRIPL; CARLIN T, 20…	A BLOCKCHAIN IS A DISTRIBUTED LEDGER (DL) THAT RECORDS AND TRACKS OF TRANSACTIONS ON A P2P NETWORK. IT WAS ORIGINALLY DESIGNED FOR CRYPTOCURRENCIES, BUT IT IS NOW USED IN HEALTHCARE, SUPPLY CHAIN MANAGEMENT, FINANCE, AND MANY MORE FIELDS DUE TO ITS SECURITY AND TRUSTWORTHINESS. TRUST AND SECURITY ARE CRITICAL FACTORS IN ANY BUSINESS, AND THE B2B MODEL IS NO EXCEPTION. IN BUSINESSES, TRUST BECOMES…	#N/A	#N/A	SUPER UNIVERSITY LAHORE, DEPT COMP SCI & IT, LAHORE 54500, PAKISTAN;	BLOCKCHAIN; TRIPLE-ENTRY ACCOUNTING	10.5195/LEDGER.2023.288	REVIEW	FRAMEWORK	LEDGER-PITTSBURGH	LEDGER	ENGLISH	UNIV PITTSBURGH, UNIV LIBRARY SYSTEM	2023	SARWAR, MI (CORRESPONDING AUTHOR), SUPER UNIV LAHORE, DEPT COMP SCI & IT, LAHORE 54500, PAKISTAN.	#N/A	LEDGER	1	BLOCKCHAINS AND TRIPLEENTRY ACCOUNTING FOR B2B BUSINESS MODELS	8	ISI	SUPER UNIV LAHORE	SUPER UNIV LAHORE	#N/A	SARWAR MI, 2023, LEDGER-PITTSBURGH	SARWAR MI, 2023, LEDGER-PITTSBURGH
SCHMITZ J, 2019, AUST ACCOUNT REV	SCHMITZ J; LEONI G	SCHMITZ, JANA; LEONI, GIULIA	ANONYMOUS, 2016, BLOCKCH TECHN GAM CH; ANONYMOUS, 2016, WHAT'S NEXT FOR BLOCKCHAIN IN 2016?; APTE S, 2016, J EXCIPIENTS FOOD CH, V7; ASSOCIATION OF CHARTERED CERTIFIED ACCOUNTANTS (ACCA) AND CPA CANADA, 2017, DIV WE FALL DISTR WE; ATZORI M, 2016, SSRN ELECTRON. J, DOI 10.2139/SSRN.2709713, DOI 10.2139/SSRN.2709713; BJORNENAK T, 1997, MANAGE ACCOUNT RES, V8, P3, DOI DOI 10.1006/MARE.1996.0031; BOW…	BLOCKCHAIN IS A DISTRIBUTED LEDGER TECHNOLOGY EXPECTED TO HAVE SIGNIFICANT IMPACTS ON THE ACCOUNTING AND AUDITING PROFESSION. THIS STUDY, APPLICABLE AND TIMELY FOR BOTH ACCOUNTING AND AUDITING SCHOLARS AND PRACTITIONERS, EXPLORES BLOCKCHAIN TECHNOLOGY AND ITS MAIN IMPLICATIONS FOR THE ACCOUNTING AND AUDITING PROFESSION. THE RESEARCH QUESTION ADDRESSED IN THIS STUDY IS: WHAT ARE THE MAJOR THEMES E…	#N/A	#N/A	RMIT UNIVERSITY, 124 LA TROBE ST, MELBOURNE, VIC 3000, AUSTRALIA; UNIVERSITY GENOA, GENOA, ITALY;	ACCOUNTING; AUDITING; BLOCKCHAIN	10.1111/auar.12286	ARTICLE	INFORMATION; BITCOIN	AUST ACCOUNT REV	AUST. ACCOUNT. REV.	ENGLISH	WILEY	2019	SCHMITZ, J (CORRESPONDING AUTHOR), RMIT UNIV, 124 LA TROBE ST, MELBOURNE, VIC 3000, AUSTRALIA.	1035-6908	AUSTRALIAN ACCOUNTING REVIEW	128	ACCOUNTING AND AUDITING AT THE TIME OF BLOCKCHAIN TECHNOLOGY A RESEARCH AGENDA	29	ISI	ROYAL MELBOURNE INSTITUTE OF TECHNOLOGY (RMIT); MELBOURNE GENOMICS HEALTH ALLIANCE; UNIVERSITY OF GENOA	RMIT UNIV	#N/A	SCHMITZ J, 2019, AUST ACCOUNT REV	SCHMITZ J, 2019, AUST ACCOUNT REV
SETHIBE T, 2021, PROC EUR CONF ENTREP	SETHIBE T; MALINGA S	SETHIBE, TEBOGO; MALINGA, SIBUSISO	APPELBAUM D, 2018, THE CPA JOURNAL, V88, P28, DOI DOI 10.1007/S12525-020-00428-1; BARON J, 2017, BLOCKCHAIN ACCOUNTIN; BRANDON D, 2016, INT J ACAD BUS WORLD, V10, P33, DOI DOI 10.1364/BOE.6.003898; BRAUN V, 2006, QUAL. RES. PSYCHOL., V3, P77, DOI 10.1191/1478088706QP063OA, DOI 10.1191/1478088706QP063OA; BYSTRÖM H, 2019, LEDGER-PITTSBURGH, V4, P40, DOI 10.5195/LEDGER.2019.100; CHEN C, 2012, CONTEM…	SINCE THE INCEPTION OF THE CRYPTOCURRENCY BITCOIN, BLOCKCHAIN TECHNOLOGY HAS GAINED MUCH ATTENTION AMONGST SCHOLARS FROM VARIOUS INDUSTRIES, INCLUDING ACCOUNTING AND AUDITING. BLOCKCHAIN TECHNOLOGY IS A SECURE DISTRIBUTED LEDGER PROMISING TO CHANGE THE PRINCIPLE OF DOUBLE ENTRY-BASED ACCOUNTING AND TO PROVIDE ECONOMIC ADVANTAGE. MORE SIGNIFICANTLY, BLOCKCHAIN TECHNOLOGY CAN IMPROVE OPERATIONAL EF…	MATOS, F FERREIRO, MD ROSA, A SALAVISA, I	978-1-914587-15-3	AGR RES COUNCIL, PRETORIA, SOUTH AFRICA; UNIVERSITY WITWATERSRAND, BUSINESS SCH, JOHANNESBURG, SOUTH AFRICA;	ACCOUNTING; AUDITING; BLOCKCHAIN; INNOVATION	10.34190/EIE.21.001	PROCEEDINGS PAPER	ACCEPTANCE; FIRM	PROC EUR CONF ENTREP	#N/A	ENGLISH	ACAD CONFERENCES LTD	2021	SETHIBE, T (CORRESPONDING AUTHOR), AGR RES COUNCIL, PRETORIA, SOUTH AFRICA.	2049-1050	PROCEEDINGS OF THE 16TH EUROPEAN CONFERENCE ON INNOVATION AND ENTREPRENEURSHIP (ECIE 2021), VOL 2	0	BLOCKCHAIN TECHNOLOGY INNOVATION AN INVESTIGATION OF THE ACCOUNTING AND AUDITING USECASES	#N/A	ISI	AGRICULTURAL RESEARCH COUNCIL OF SOUTH AFRICA; UNIVERSITY OF WITWATERSRAND	AGR RES COUNCIL	#N/A	SETHIBE T, 2021, PROC EUR CONF ENTREP	SETHIBE T, 2021, PROC EUR CONF ENTREP
SHVAYKO ML, 2020, FINANC CREDIT ACT	SHVAYKO M; GREBENIUK N	SHVAYKO, M.L.; GREBENIUK, N.O.	A WORLD BANK GROUP, 2020, EC PROF UKR; ANONYMOUS, 2019, INDEX OF ECONOMIC FREEDOM; BUREAU OF ECONOMIC AND BUSINESS AFFAIRS, 2018, INV CLIM STAT REP; DERZHAVNA SLUZHBA STATYSTYKY UKRAINY, PRIAM IN INV; FEDORCHAK O, 2017, GOVERNANCE, V4, P45; PALYVODA K, 2018, EKONOMIKA TA DERZHAV, V3, P4; PEREVOZOVA I, 2019, FINANC CREDIT ACT, V1, P26;VERKHOVNA RADA UKRAINY, 2018, VIDOMOSTI VERKHOVNOI, V30; WILKIN…	THE ARTICLE INVESTIGATES MODERN APPROACHES TO DEFINE THE CONCEPT OF INVESTMENT CLIMATE. THE LATTER IS CONSIDERED TO REMAIN UNFAVORABLE IN UKRAINE, ALTHOUGH THERE ARE SOME POSITIVE CHANGES IN THIS DIRECTION. THE FACTORS WHICH DETERMINE THE STATE OF INVESTMENT CLIMATE ARE IDENTIFIED AND STRUCTURED IN THIS PAPER. THEY INCLUDE SOCIAL, INSTITUTIONAL, ECONOMIC, INTEGRATION AND MAN-MADE ONES. THE KEY IN…	#N/A	#N/A	KHARKOV NATIONAL UNIVERSITY, KHARKIV, UKRAINE;	INVESTMENT CLIMATE; INVESTMENT RATINGS; CREDITING INSTRUMENTS; BANKING; MONETARY POLICY	#N/A	ARTICLE	#N/A	FINANC CREDIT ACT	FINANC. CREDIT ACT.	ENGLISH	NATL BANK UKRAINE, UNIV BANKING, KHARKIV INST BANKING	2020	SHVAYKO, ML (CORRESPONDING AUTHOR), KHARKOV NATL UNIV, KHARKIV, UKRAINE.	2306-4994	FINANCIAL AND CREDIT ACTIVITY-PROBLEMS OF THEORY AND PRACTICE	1	CURRENT CREDITING INSTRUMENTS INFLUENCING INVESTMENT CLIMATE IN UKRAINE	1	ISI	MINISTRY OF EDUCATION AND SCIENCE OF UKRAINE; VN KARAZIN KHARKIV NATIONAL UNIVERSITY	KHARKOV NATL UNIV	#N/A	SHVAYKO ML, 2020, FINANC CREDIT ACT	SHVAYKO ML, 2020, FINANC CREDIT ACT
SMITH SS, 2018, AUSTRALAS ACCOUNT BU	SMITH S	SMITH, SEAN STEIN	ALARCON J, 2018, PENNSYLVANIA CPA J, V88, P3; BERENTSEN A, 2018, FED RESERVE BANK ST, V100, P97, DOI 10.20955/R.2018.97-106; BORTHICK A, 2017, J INF SYST, V31, P1, DOI 10.2308/ISYS-10554; COHEN L, 2017, INT FINANCIAL LAW RE, P31; COHEN R, 2018, INT FINANCIAL LAW RE, P21; CRABB J, 2017, INT FINANCIAL LAW RE, P1; DAI J, 2017, J INF SYST, V31, P5, DOI 10.2308/ISYS-51804; DEROSE C, 2016, AM BANKER, V…	PERCEIVED PRICE VOLATILITY OF CRYPTOCURRENCIES MAY DISTRACT PRACTITIONERS FROM FURTHER DEVELOPMENTS IN THE BLOCKCHAIN SPACE THAT MAY GENERATE AUDIT AND OTHER IMPLICATIONS. AS NEXT STEP APPLICATIONS AND DEVELOPMENTS ARE BUILT ON TOP OF EXISTING BLOCKCHAIN PROGRAMMING, THE POTENTIAL IMPLICATIONS FOR BOTH ACCOUNTING AND LEGAL PRACTITIONERS MAY BE SUBSTANTIVE. ESPECIALLY AS DIFFERENT BLOCKCHAIN TOOLS…	#N/A	#N/A	CITY UNIVERSITY OF NEW YORK, LEHMAN COLL, NEW YORK, NY 10021, USA;	BLOCKCHAIN; ACCOUNTING; CRYPTOCURRENCY; REPORTING; INNOVATION	10.14453/aabfj.v12i4.6	ARTICLE	#N/A	AUSTRALAS ACCOUNT BU	AUSTRALAS. ACCOUNT. BUS. FINANC. J.	ENGLISH	UNIV WOLLONGONG	2018	SMITH, SS (CORRESPONDING AUTHOR), CUNY, LEHMAN COLL, NEW YORK, NY 10021 USA.	1834-2000	AUSTRALASIAN ACCOUNTING BUSINESS AND FINANCE JOURNAL	16	IMPLICATIONS OF NEXT STEP BLOCKCHAIN APPLICATIONS FOR ACCOUNTING AND LEGAL PRACTITIONERS A CASE STUDY	12	ISI	CITY UNIVERSITY OF NEW YORK (CUNY) SYSTEM; LEHMAN COLLEGE (CUNY)	LEHMAN COLL	#N/A	SMITH SS, 2018, AUSTRALAS ACCOUNT BU	SMITH SS, 2018, AUSTRALAS ACCOUNT BU
SMITH SS, 2019, INT J DIGIT ACCOUNT RES	SMITH S; PETKOV R; LAHIJANI R	SMITH SEAN STEIN; PETKOV ROSSEN; LAHIJANI RICHARD	none	THE RISE AND CONTINUED IMPLEMENTATION OF CRYPTOCURRENCIES AND OTHER CRYPTOASSETS IS HAVING, AND WILL CONTINUE TO HAVE, A DISRUPTIVE IMPACT ON THE ACCOUNTING, FEDERAL INCOME TAXATION, AND BROADER FINANCIAL SERVICES INDUSTRIES. MUCH HAS BEEN WRITTEN, RESEARCHED, AND DISCUSSED ABOUT BOTH CRYPTOCURRENCIES AND THE UNDERLYING BLOCKCHAIN TECHNOLOGY, BUT UNCERTAINTY REMAINS AS IT PERTAINS TO HOW THESE IT…	#N/A	#N/A	CITY UNIVERSITY OF NEW YORK, LEHMAN COLLEGE, USA;	ACCOUNTING; BLOCKCHAIN; MANAGEMENT; CRYPTO ASSETS; CRYPTOCURRENCY; INNOVATION	10.4192/1577-8517-v19_3	ARTICLE	#N/A	INT J DIGIT ACCOUNT RES	INT. J. DIGIT. ACCOUNT. RES.	ENGLISH	UNIVERSIDAD DE HUELVA	2019	S.S. SMITH; LEHMAN COLLEGE, CITY UNIVERSITY OF NEW YORK, UNITED STATES; EMAIL: SEAN.STEINSMITH@LEHMAN.CUNY.EDU	15778517	INTERNATIONAL JOURNAL OF DIGITAL ACCOUNTING RESEARCH	13	BLOCKCHAIN AND CRYPTOCURRENCIES CONSIDERATIONS FOR TREATMENT AND REPORTING FOR FINANCIAL SERVICES PROFESSIONALS	19	ISI	CITY UNIVERSITY OF NEW YORK	NOTREPORTED;CITY UNIVERSITY OF NEW YORK;NOTREPORTED	#N/A	SMITH SS, 2019, INT J DIGIT ACCOUNT RES	SMITH SS, 2019, INT J DIGIT ACCOUNT RES
SMITH SS, 2020, J EMERG TECHNOL ACCOUNT	SMITH S; CASTONGUAY J	SMITH SEAN STEIN; CASTONGUAY JOHN JACK	none	BLOCKCHAIN TECHNOLOGY HAS BEEN A DISRUPTIVE FORCE IN CURRENCY, SUPPLY CHAIN, AND INFORMATION SHARING PRACTICES ACROSS A VARIETY OF INDUSTRIES. ITS USAGE HAS ONLY RECENTLY EXPANDED INTO ASSURANCE AND FINANCIAL REPORTING. THIS PAPER EXPLORES BLOCKCHAIN’S IMPACT IN THESE AREAS AND PROVIDES GUIDANCE FOR ORGANIZATIONS AND AUDITORS UTILIZING BLOCKCHAIN BY ADDRESSING FINANCIAL DATA INTEGRITY ISSUES, FIN…	#N/A	#N/A	CITY UNIVERSITY OF NEW YORK, LEHMAN COLLEGE, USA; HOFSTRA UNIVERSITY, USA;	ASSURANCE; AUDITING; BLOCKCHAIN; CORPORATE GOVERNANCE; CRYPTOCURRENCY	10.2308/jeta-52686	ARTICLE	#N/A	J EMERG TECHNOL ACCOUNT	J. EMERG. TECHNOL. ACCOUNT.	ENGLISH	AMERICAN ACCOUNTING ASSOCIATION	2020	#N/A	15541908	JOURNAL OF EMERGING TECHNOLOGIES IN ACCOUNTING	43	BLOCKCHAIN AND ACCOUNTING GOVERNANCE EMERGING ISSUES AND CONSIDERATIONS FOR ACCOUNTING AND ASSURANCE PROFESSIONALS	17	ISI	LEHMAN COLLEGE–CUNY;HOFSTRA UNIVERSITY	LEHMAN COLLEGE–CUNY;HOFSTRA UNIVERSITY	#N/A	SMITH SS, 2020, J EMERG TECHNOL ACCOUNT	SMITH SS, 2020, J EMERG TECHNOL ACCOUNT
SMITH SS, 2021, INT J DIGIT ACCOUNT RES	SMITH S	SMITH SEAN STEIN	none	THE BLOCKCHAIN AND CRYPTOASSET SECTOR, SINCE COMING TO THE ATTENTION OF THE MAINSTREAM BUSINESS AND FINANCIAL MARKETS DURING THE BITCOIN BULL RUN OF 2017, CONTINUES TO ACCELERATE AND EVOLVE RAPIDLY. DECENTRALIZED FINANCE (DEFI), A NEW ITERATION OF WHAT WAS PREVIOUSLY REFERRED TO AS OPEN FINANCE, HAS EMERGED AS AN INNOVATIVE USE CASE AND SERVICE ENABLED BY BLOCKCHAIN TECHNOLOGY. AS WITH ANY INNOVA…	#N/A	#N/A	CITY UNIVERSITY OF NEW YORK, LEHMAN COLLEGE, USA;	ACCOUNTING; BLOCKCHAIN; DECENTRALIZED FINANCE; FINANCIAL REPORTING; STABLECOINS	10.4192/1577-8517-v21_5	ARTICLE	#N/A	INT J DIGIT ACCOUNT RES	INT. J. DIGIT. ACCOUNT. RES.	ENGLISH	UNIVERSIDAD DE HUELVA	2021	S.S. SMITH; CITY UNIVERSITY OF NEW YORK, LEHMAN COLLEGE, UNITED STATES; EMAIL: DRSEANSTEINSMITH@GMAIL.COM	15778517	INTERNATIONAL JOURNAL OF DIGITAL ACCOUNTING RESEARCH	4	DECENTRALIZED FINANCE ACCOUNTING IMPLICATIONS CONSIDERATIONS AND OPPORTUNITIES FOR DEVELOPMENT	21	ISI	CITY UNIVERSITY OF NEW YORK	NOTREPORTED;CITY UNIVERSITY OF NEW YORK;NOTREPORTED	#N/A	SMITH SS, 2021, INT J DIGIT ACCOUNT RES	SMITH SS, 2021, INT J DIGIT ACCOUNT RES
SMITH SS, 2021, THE EMERALD HANDB OF BLOCKCHAIN FOR BUS	SMITH S	SMITH SEAN STEIN	none	#N/A	#N/A	978-183982198-1; 978-183982199-8	CITY UNIVERSITY OF NEW YORK, LEHMAN COLLEGE, USA;	ACCOUNTING; BLOCKCHAIN; CRYPTO ASSETS; DISCLOSURE; FINANCIAL REPORTING; SMART CONTRACT; STABLECOINS	10.1108/978-1-83982-198-120211026	BOOK CHAPTER	#N/A	THE EMERALD HANDB OF BLOCKCHAIN FOR BUS	THE EMERALD HANDB. OF BLOCKCHAIN FOR BUS.	ENGLISH	EMERALD GROUP PUBLISHING LTD.	2021	#N/A	#N/A	THE EMERALD HANDBOOK OF BLOCKCHAIN FOR BUSINESS	2	CRYPTO ACCOUNTING VALUATION REPORTING AND DISCLOSURE	#N/A	ISI	CITY UNIVERSITY OF NEW YORK	CITY UNIVERSITY OF NEW YORK	#N/A	SMITH SS, 2021, THE EMERALD HANDB OF BLOCKCHAIN FOR BUS	SMITH SS, 2021, THE EMERALD HANDB OF BLOCKCHAIN FOR BUS
SMITH SS, 2023, THE EMERALD HANDB ON CRYPTOASSETS: INVEST OPPOR AND CHALLENGES	SMITH S	SMITH SEAN STEIN	none	THIS CHAPTER EXAMINES SOME EMERGING TOPICS AND TRENDS AS IT CONNECTS CRYPTOASSETS TO ACCOUNTING, AUDITING, AND FINANCIAL REPORTING. IT DISCUSSES THE TREATMENT OF CRYPTOASSETS FROM A FINANCIAL REPORTING PERSPECTIVE UNDER THE US AND INTERNATIONAL ACCOUNTING STANDARDS, FREQUENTLY ASKED QUESTIONS ABOUT AUDITING AND ATTESTATION, AND POTENTIAL BEST PRACTICES FOR AUDITING VARIOUS CRYPTOASSETS. IT ALSO D…	#N/A	978-180455320-6; 978-180455321-3	CITY UNIVERSITY OF NEW YORK, LEHMAN COLLEGE, USA;	ACCOUNTING; ACCOUNTING STANDARDS; AUDITING; CRYPTO ASSETS; FINANCIAL REPORTING	10.1108/978-1-80455-320-620221002	BOOK CHAPTER	#N/A	THE EMERALD HANDB ON CRYPTOASSETS: INVEST OPPOR AND CHALLENGES	THE EMERALD HANDB. ON CRYPTOASSETS: INVEST. OPPOR. AND CHALLENGES	ENGLISH	EMERALD GROUP PUBLISHING LTD.	2023	#N/A	#N/A	THE EMERALD HANDBOOK ON CRYPTOASSETS: INVESTMENT OPPORTUNITIES AND CHALLENGES	3	THE CRYPTOASSET AUDITING AND ACCOUNTING LANDSCAPE	#N/A	ISI	CITY UNIVERSITY OF NEW YORK	CITY UNIVERSITY OF NEW YORK	#N/A	SMITH SS, 2023, THE EMERALD HANDB ON CRYPTOASSETS: INVEST OPPOR AND CHALLENGES	SMITH SS, 2023, THE EMERALD HANDB ON CRYPTOASSETS: INVEST OPPOR AND CHALLENGES
SOEPRIYANTO G, 2023, INT J EMERG MARK	SOEPRIYANTO G; HAVIDZ S; HANDIKA R	SOEPRIYANTO, GATOT; HAVIDZ, SHINTA AMALINA HAZRATI; HANDIKA, RANGGA	ALBAGLI E, 2019, J FINANC ECON, V134, P447, DOI 10.1016/J.JFINECO.2019.04.007; ALIZADEH T, 2017, TELECOMMUN POLICY, V41, P242, DOI 10.1016/J.TELPOL.2017.02.002; ALIZADEH T, 2015, INT J CRIT INFRASTRU, V11, P278, DOI 10.1504/IJCIS.2015.072156; ANASTASOPOULOS A, 2018, RES INT BUS FINANC, V45, P499, DOI 10.1016/J.RIBAF.2017.09.001; ANTONAKAKIS N, 2019, J INT FINANC MARK I, V61, P37, DOI 10.1016/J.IN…	PURPOSETHIS STUDY PROVIDES A COMPREHENSIVE ANALYSIS OF THE POTENTIAL CONTAGION OF BITCOIN ON FINANCIAL MARKETS AND SHEDS LIGHT ON THE COMPLEX INTERPLAY BETWEEN TECHNOLOGICAL ADVANCEMENTS, ACCOUNTING REGULATORY AND FINANCIAL MARKET STABILITY.DESIGN/METHODOLOGY/APPROACHTHE STUDY EMPLOYS A MULTI-FACETED APPROACH TO ANALYZE THE IMPACT OF BTC SYSTEMIC RISK, TECHNOLOGICAL FACTORS AND REGULATORY VARIABL…	#N/A	#N/A	BINA NUSANTARA UNIVERSITY, ACCOUNTING DEPT, JAKARTA, INDONESIA; BINA NUSANTARA UNIVERSITY, FINANCE PROGRAM, JAKARTA, INDONESIA; TOKYO INT UNIVERSITY, INST INT STRATEGY, TOKYO, JAPAN;	CRYPTOCURRENCY; RISK; ASSET PRICING; CONTAGION; TECHNOLOGICAL ADVANCEMENT; ACCOUNTING; MULTINOMIAL LOGISTIC REGRESSION	10.1108/IJOEM-07-2022-1127	ARTICLE; EARLY ACCESS	TELECOMMUNICATION INFRASTRUCTURE; MANDATORY ADOPTION; VOLATILITY; CRISIS; INTERDEPENDENCE; SPILLOVERS; RETURN; INVESTMENT; STANDARDS; ROLLOUT	INT J EMERG MARK	INT. J. EMERG. MARK.	ENGLISH	EMERALD GROUP PUBLISHING LTD	2023	SOEPRIYANTO, G (CORRESPONDING AUTHOR), BINA NUSANTARA UNIV, ACCOUNTING DEPT, JAKARTA, INDONESIA.	1746-8809	INTERNATIONAL JOURNAL OF EMERGING MARKETS	0	CRYPTO GOES EAST ANALYZING BITCOIN TECHNOLOGICAL AND REGULATORY CONTAGIONS IN ASIAPACIFIC FINANCIAL MARKETS USING ASSET PRICING	#N/A	ISI	UNIVERSITAS BINA NUSANTARA; UNIVERSITAS BINA NUSANTARA	BINA NUSANTARA UNIV	#N/A	SOEPRIYANTO G, 2023, INT J EMERG MARK	SOEPRIYANTO G, 2023, INT J EMERG MARK
SOKOLENKO L, 2019, ACAD ACCOUNT FINANC STUD J	SOKOLENKO L; OSTAPENKO T; KUBETSKA O; PORTNA O; TRAN T	SOKOLENKO LIUDMYLA; OSTAPENKO TETIANA; KUBETSKA OLGA; PORTNA OKSANA; TRAN THUY	none	THE USE OF CRYPTOCURRENCIES IN INTERNATIONAL PRACTICE SUGGESTS THAT COUNTRIES ARE DIFFERENT IN ITS IMPLEMENTATION IN CIRCULATION. THIS IS EXPLAINED, FIRST OF ALL, BY THE NOVELTY OF THIS INSTRUMENT AND THE LACK OF A SINGLE DEFINITION OF THE "CRYPTOLOGY" CATEGORY, WHICH WOULD REVEAL ITS ESSENCE. THE POSITIVE ATTITUDE TOWARDS BITCOINS IS TYPICAL FOR DEVELOPED COUNTRIES, AND IN DEVELOPING COUNTRIES T…	#N/A	#N/A	SUMY NATIONAL AGRARIAN UNIVERSITY, UKRAINE; POLTAVA STATE AGRARIAN ACADEMY, UKRAINE; V.N.KARAZIN KHARKIV NATIONAL UNIVERSITY, UKRAINE; ODESSA NATIONAL POLYTECHNIC UNIVERSITY, UKRAINE;	CRYPTOCURRENCY; ELECTRONIC MONEY; EXCHANGE RATE; EXCHANGE RATE DIFFERENCES; PEERING OF VIRTUAL CURRENCY	#N/A	ARTICLE	#N/A	ACAD ACCOUNT FINANC STUD J	ACAD. ACCOUNT. FINANC. STUD. J.	ENGLISH	ALLIED BUSINESS ACADEMIES	2019	#N/A	10963685	ACADEMY OF ACCOUNTING AND FINANCIAL STUDIES JOURNAL	5	CRYPTOCURRENCY ECONOMIC ESSENCE AND FEATURES OF ACCOUNTING	23	ISI	SUMY NATIONAL AGRARIAN UNIVERSITY;POLTAVA STATE AGRARIAN ACADEMY;V. N. KARAZIN KHARKIV NATIONAL UNIVERSITY;ODESSA NATIONAL POLYTECHNIC UNIVERSITY	SUMY NATIONAL AGRARIAN UNIVERSITY;POLTAVA STATE AGRARIAN ACADEMY;V. N. KARAZIN KHARKIV NATIONAL UNIVERSITY;ODESSA NATIONAL POLYTECHNIC UNIVERSITY	#N/A	SOKOLENKO L, 2019, ACAD ACCOUNT FINANC STUD J	SOKOLENKO L, 2019, ACAD ACCOUNT FINANC STUD J
STERN M, 2021, J ACCOUNT EDUC	STERN M; REINSTEIN A	STERN MYLES; REINSTEIN ALAN	none	WE DESCRIBE HOW ACCOUNTING AND OTHER BUSINESS PROFESSORS CAN ADD BLOCKCHAIN AS A SEPARATE COURSE OR AN ADDITION TO AN EXISTING COURSE. BASED UPON A POPULAR, ONLINE COURSE AT WAYNE STATE UNIVERSITY (WSU), WE PROVIDE EXAMPLES OF A COURSE SYLLABUS, SUGGESTED READINGS, GROUP AND INDIVIDUAL ASSIGNMENTS MATERIALS, AND STUDENT COMMENTS. THIS COURSE ADDRESSES TWO KEY FEATURES THAT IANSITI & LAKHAN (2017)…	#N/A	#N/A	WAYNE STATE UNIVERSITY, MIKE ILITCH SCHOOL OF BUSINESS, 2771 WOODWARD AVENUE, DETROIT, 48201, MI, USA;	BITCOIN; BLOCKCHAIN; CRYPTOCURRENCY; ETHEREUM; HYPERLEDGER FABRIC; SMART CONTRACT	10.1016/j.jaccedu.2021.100742	ARTICLE	#N/A	J ACCOUNT EDUC	J. ACCOUNT. EDUC.	ENGLISH	ELSEVIER LTD	2021	M. STERN; MIKE ILITCH SCHOOL OF BUSINESS, WAYNE STATE UNIVERSITY, DETROIT, 2771 WOODWARD AVENUE, 48201, UNITED STATES; EMAIL: M.STERN@WAYNE.EDU	07485751	JOURNAL OF ACCOUNTING EDUCATION	7	A BLOCKCHAIN COURSE FOR ACCOUNTING AND OTHER BUSINESS STUDENTS	56	ISI	WAYNE STATE UNIVERSITY	NOTREPORTED;WAYNE STATE UNIVERSITY;NOTREPORTED	#N/A	STERN M, 2021, J ACCOUNT EDUC	STERN M, 2021, J ACCOUNT EDUC
STRATOPOULOS TC, 2020, J EMERG TECHNOL ACCO	STRATOPOULOS T	STRATOPOULOS, THEOPHANIS C.	ABREU P, 2018, BLOCKCHAIN TECHNOLOG; AICPA AND CPA CANADA, 2017, BLOCKCH TECHN ITS PO; ARROWSMITH R, 2019, ACCOUNTING TODAY, P18; CALDERON J, 2020, INTRO BLOCKCHAIN ACC; CANADA LIFE ASSURANCE COMPANY, 2019, UND MARK VOL; CANADIAN PUBLIC ACCOUNTABILITY BOARD (CPAB), 2019, AUD CRYPT ASS SECT I; CARLOZO L, 2017, WHY CPAS NEED GET GR; CASINO F, 2019, TELEMAT INFORM, V36, P55, DOI 10.1016/J.TELE.2018.…	THE OBJECTIVE OF THESE TEACHING NOTES IS TO PROVIDE AN OUTLINE FOR OFFERING BLOCKCHAIN RELATED FOUNDATIONAL KNOWLEDGE TO ACCOUNTING STUDENTS SO THEY CAN EVALUATE AND PREPARE FOR THE EFFECT OF BLOCKCHAIN ON THE ACCOUNTING PROFESSION. THE APPROACH IS DRIVEN BY THE FOLLOWING PRINCIPLE: GIVEN THAT ACCOUNTING STUDENTS DO NOT WANT TO BECOME PROGRAMMERS OR CRYPTOGRAPHERS, WHAT IS THE ESSENTIAL BLOCKCHAI…	#N/A	#N/A	UNIVERSITY WATERLOO, SCH ACCOUNTING & FINANCE, WATERLOO, ON, CANADA;	BLOCKCHAIN; HASHING; PROOF-OF-WORK; HYPERLEDGER	10.2308/JETA-2020-052	ARTICLE	#N/A	J EMERG TECHNOL ACCO	J. EMERG. TECHNOL. ACCOUNT.	ENGLISH	AMER ACCOUNTING ASSOC	2020	STRATOPOULOS, TC (CORRESPONDING AUTHOR), UNIV WATERLOO, SCH ACCOUNTING & FINANCE, WATERLOO, ON, CANADA.	1554-1908	JOURNAL OF EMERGING TECHNOLOGIES IN ACCOUNTING	4	TEACHING BLOCKCHAIN TO ACCOUNTING STUDENTS	17	ISI	UNIVERSITY OF WATERLOO	UNIV WATERLOO	#N/A	STRATOPOULOS TC, 2020, J EMERG TECHNOL ACCO	STRATOPOULOS TC, 2020, J EMERG TECHNOL ACCO
TERANDO WD, 2017, ATA J LEG TAX RES	TERANDO W; CATALDI B; MENNECKE B	TERANDO, WILLIAM D.; CATALDI, BRYAN; MENNECKE, BRIAN E.	ANONYMOUS, 2008, WORKING PAPER; CHUNG S, 2008, VIRGINIA TAX REV, V28, P1; COHN M, 2013, ACCOUNTING TODAY; LEDERMAN L, 2007, NEW YORK U LAW REV, V82, P1620; MARJANICH N, 2014, DEPAUL LAW REV, V64, P237; SETO T, 2008, 200824 LOYOL LA; TERANDO W, 2008, ATA J LEG TAX RES, V6, P94, DOI 10.2308/JLTR.2008.6.1.94; VOLASTRO A, 2014, CNBC EXPLAINS MINE B	IRS NOTICE 2014-21 PROVIDES THAT VIRTUAL CONVERTIBLE CURRENCIES, INCLUDING BITCOINS, BE TREATED AS PROPERTY RATHER THAN CURRENCY, AND THE GENERAL TAX PRINCIPLES APPLICABLE TO PROPERTY TRANSACTIONS APPLY TO ALL RELATED TRANSACTIONS. IN THIS PAPER, WE SUGGEST THAT THE AMBIGUITY CREATED BY RELYING ON TAXPAYER INTENT/USE CREATES AN OPPORTUNITY FOR BITCOIN TRADERS TO APPROXIMATE THE BENEFITS OF FOREIG…	#N/A	#N/A	BUTLER UNIVERSITY, INDIANAPOLIS, IN 46208, USA;	BITCOIN; IRC SECTION 475; COMMODITIES; BITCOIN TRADERS AND DEALERS	10.2308/jltr-52053	ARTICLE	VIRTUAL WORLDS	ATA J LEG TAX RES	ATA J. LEG. TAX RES.	ENGLISH	AMER ACCOUNTING ASSOC	2017	TERANDO, WD (CORRESPONDING AUTHOR), BUTLER UNIV, INDIANAPOLIS, IN 46208 USA.	1543-866X	ATA JOURNAL OF LEGAL TAX RESEARCH	3	IMPACT OF THE IRC SECTION 475 MARKTOMARKET ELECTION ON BITCOIN TAXATION	15	ISI	BUTLER UNIVERSITY	BUTLER UNIV	#N/A	TERANDO WD, 2017, ATA J LEG TAX RES	TERANDO WD, 2017, ATA J LEG TAX RES
TSUJIMURA K, 2019, STAT J IAOS	TSUJIMURA K; TSUJIMURA M	TSUJIMURA KAZUSUKE; TSUJIMURA MASAKO	none	THE 1920S WAS A DECADE OF GREAT INVENTIONS AND OF SUBSTANTIAL PRODUCTIVITY GROWTH; PEOPLE FOUND IT DIFFICULT TO UNDERSTAND WHY THE GREAT DEPRESSION COULD FOLLOW A DECADE OF UNPRECEDENTED PROSPERITY. WESLEY MITCHELL AND MORRIS COPELAND, WHO HAVE INITIATED THE FLOW OF FUNDS ANALYSIS, URGED A BETTER UNDERSTANDING OF THE CIRCULATION OF FUNDS BETWEEN THE FINANCIAL AND NONFINANCIAL ECONOMY. SINCE FUNDS…	#N/A	#N/A	KEIO UNIVERSITY, TOKYO, JAPAN; MEISEI UNIVERSITY, TOKYO, JAPAN; RISSHO UNIVERSITY, FACULTY OF ECONOMICS, 4-2-16 OSAKI, SHINAGAWA, TOKYO, 141-8602, JAPAN; KEIO ECONOMIC OBSERVATORY, KEIO UNIVERSITY, TOKYO, JAPAN;	ANCIENT ROME; ARGENTARII; DOUBLE ENTRY SYSTEM; PURE CREDIT ECONOMY; VIRTUAL CURRENCY	10.3233/SJI-190512	CONFERENCE PAPER	#N/A	STAT J IAOS	STAT. J. IAOS	ENGLISH	IOS PRESS	2019	M. TSUJIMURA; RISSHO UNIVERSITY, FACULTY OF ECONOMICS, SHINAGAWA, TOKYO, 4-2-16 OSAKI, 141-8602, JAPAN; EMAIL: TSUJIMURA@RIS.AC.JP	18747655	STATISTICAL JOURNAL OF THE IAOS	5	FLOW OF FUNDS ANALYSIS A COMBINATION OF ROMAN LAW ACCOUNTING AND ECONOMICS	35	ISI	KEIO UNIVERSITY;MEISEI UNIVERSITY;RISSHO UNIVERSITY;KEIO UNIVERSITY	NOTREPORTED;RISSHO UNIVERSITY;NOTREPORTED	#N/A	TSUJIMURA K, 2019, STAT J IAOS	TSUJIMURA K, 2019, STAT J IAOS
TZAGKARAKIS G, 2023, COMPUT ECON	TZAGKARAKIS G; MAURER F	TZAGKARAKIS, GEORGE; MAURER, FRANTZ	ACERBI C, 2014, BACKTESTING EXPECTED; ARTZNER P, 1999, MATH FINANC, V9, P203, DOI 10.1111/1467-9965.00068; BCBS, 2016, MINIMUM CAPITAL REQUIREMENTS FOR MARKET RISK; BELLINI F, 2015, QUANT FINANC, V15, P725, DOI 10.1080/14697688.2014.946955; BERTSIMAS D, 2004, J ECON DYN CONTROL, V28, P1353, DOI 10.1016/S0165-1889(03)00109-X; BORRI N, 2019, J EMPIR FINANC, V50, P1, DOI 10.1016/J.JEMPFIN.2018.11.00…	RISK QUANTIFICATION FOR CRYPTOCURRENCY ASSETS IS A CHALLENGING TASK DUE TO THEIR SPECULATIVE NATURE AND STRONGLY HEAVY-TAILED RETURNS. EXISTING MEASURES OF TAIL RISK ARE BASED PRIMARILY ON THE VARIABILITY OF EXTREME RETURNS, WHILST IGNORING THE MULTIPLE BIASES OCCURRING AT DISTINCT FREQUENCIES OTHER THAN THE ORIGINAL SAMPLING FREQUENCY. AS SUCH, THEY OFTEN FAIL TO ADAPT TO SPECIFIC INVESTMENT HOR…	#N/A	#N/A	FDN RES & TECHNOL HELLAS, N PLASTIRA 100, GR-70013 IRAKLION, CRETE, GREECE; UNIVERSITY BORDEAUX, IRGO, EA 4190, 35 AVE ABADIE,CS 51412, BORDEAUX, FRANCE; KEDGE BUSINESS SCHOOL, 680 CR LIBERAT, F-33405 TALENCE, FRANCE;	ALPHA-STABLE MODELS; CRYPTOCURRENCY; FRACTIONAL LOWER-ORDER MOMENTS; TAIL EVENTS; WAVELET ANALYSIS	10.1007/s10614-022-10300-3	ARTICLE	MARKET-RISK; PERSPECTIVE; SHORTFALL; BITCOIN	COMPUT ECON	COMPUT. ECON.	ENGLISH	SPRINGER	2023	TZAGKARAKIS, G (CORRESPONDING AUTHOR), FDN RES & TECHNOL HELLAS, N PLASTIRA 100, GR-70013 IRAKLION, CRETE, GREECE.; TZAGKARAKIS, G (CORRESPONDING AUTHOR), UNIV BORDEAUX, IRGO, EA 4190, 35 AVE ABADIE,CS 51412, BORDEAUX, FRANCE.	0927-7099	COMPUTATIONAL ECONOMICS	1	HORIZONADAPTIVE EXTREME RISK QUANTIFICATION FOR CRYPTOCURRENCY ASSETS	62	ISI	FOUNDATION FOR RESEARCH AND TECHNOLOGY - HELLAS (FORTH); UNIVERSITE DE BORDEAUX; KEDGE BUSINESS SCHOOL	FDN RES AND TECHNOL HELLAS;UNIV BORDEAUX	#N/A	TZAGKARAKIS G, 2023, COMPUT ECON	TZAGKARAKIS G, 2023, COMPUT ECON
VASICEK D, 2019, MEDUNAR ZNAN SIMP GO	VASICEK D; DMITROVIC V; CICAK J	VASICEK, DAVOR; DMITROVIC, VELJKO; CICAK, JOSIP	CICAK J, 2018, THESIS; DARABI R, 2013, INT J INNOVATION APP, V3, P749; DMITROVIC M, 2015, THESIS; INTERNATIONAL ACCOUNTING STANDARDS BOARD, 2016, 2016 IFRS STAND B; INTERNATIONAL ACCOUNTING STANDARDS BOARD, 2016, 2016 IFRS STAND A; JOVANOVIC M, 2018, ZB RAD EKON FAK RIJE, V36, P905, DOI 10.18045/ZBEFRI.2018.2.905; ONESTI T, 2012, EARNINGS MANAGEMENT, V4, P55, DOI DOI 10.2139/SSRN.2179159; SMITH S…	TODAY'S ACCOUNTING BUSINESS IMPLIES A CONSTANT INTERACTION WITH MODERN TECHNOLOGIES. THROUGH MODERN TECHNOLOGY, A WIDE RANGE OF TOOLS HAS BEEN DEVELOPED WHICH ACCOUNTANTS USE TO PERFORM DAY-TO-DAY ACTIVITIES. CLOUD ACCOUNTING, OR AT LEAST CLOUD-BASED STORAGE, BECOMES A COMMON PRACTICE FOR ACCOUNTANTS AROUND THE WORLD. THE DIGITAL ERA HAS GIVEN RISE TO NEW CONCEPTS, LEADING TO CHALLENGES AND OPPOR…	SIMIC, ML CRNKOVIC, B	#N/A	UNIVERSITY RIJEKA, FAC ECON & BUSINESS, RIJEKA, CROATIA; UNIVERSITY BELGRADE, FAC ORG SCI, BELGRADE, SERBIA;	ACCOUNTING; IFRS; CRYPTOCURRENCY	#N/A	PROCEEDINGS PAPER	#N/A	MEDUNAR ZNAN SIMP GO	#N/A	ENGLISH	JOSIP JURAJ STROSSMAYER UNIV OSIJEK	2019	VASICEK, D (CORRESPONDING AUTHOR), UNIV RIJEKA, FAC ECON & BUSINESS, RIJEKA, CROATIA.	1848-9559	8TH INTERNATIONAL SCIENTIFIC SYMPOSIUM ECONOMY OF EASTERN CROATIA -VISION AND GROWTH	1	ACCOUNTING OF CRYPTOCURRENCIES UNDER IFRS	#N/A	ISI	UNIVERSITY OF RIJEKA; UNIVERSITY OF BELGRADE	UNIV RIJEKA	#N/A	VASICEK D, 2019, MEDUNAR ZNAN SIMP GO	VASICEK D, 2019, MEDUNAR ZNAN SIMP GO
VEDAPRADHA R, 2023, INNOV MANAG REV	VEDAPRADHA R; RAVI H	VEDAPRADHA, R.; RAVI, HARIHARAN	AHMAD F, 2018, HDB RES NETWORK FORE, P395, DOI DOI 10.4018/978-1-5225-4100-4.CH021; AKRAM W, 2017, INTERNATIONAL JOURNAL OF ADVANCED RESEARCH IN COMPUTER SCIENCE, V8, P642; ARJUN R, 2020, INT J INTERACT MULTI, V6, P7, DOI 10.9781/IJIMAI.2020.03.004; BRANDON D, 2016, INT J ACAD BUS WORLD, V10, P33, DOI DOI 10.1364/BOE.6.003898; CHRISTOPHER C, 2016, NEVADA LAW JOURNAL, V17, P139; COCCO L, 2017, FUT…	PURPOSETHE STUDY AIM IS TO EVALUATE THE CONTRIBUTION OF BLOCKCHAIN TECHNOLOGY (CRYPTOBANKING) USING EXPECTED OPERATING MODEL (EOM) TO ADDRESS THE PAIN POINTS IN RECONCILIATION AT MIDDLE AND BACK-OFFICE OPERATIONAL LEVELS IN ASSESSING THE SIGNIFICANCE OF THIS TECHNOLOGY ON RETURN ON INVESTMENT.DESIGN/METHODOLOGY/APPROACHA STRUCTURED QUESTIONNAIRE WAS DESIGNED TO COLLECT PRIMARY DATA USING A STRATI…	#N/A	#N/A	PRESIDENCY UNIVERSITY, SCH COMMERCE & ECON, BANGALORE, INDIA;	APPLICATION PROGRAMMING INTERFACE (API); BLOCKCHAIN; OPERATIONAL MODEL; RECONCILIATION; CRYPTOBANKING	10.1108/INMR-05-2020-0060	ARTICLE	TECHNOLOGY	INNOV MANAG REV	INNOV. MANAG. REV.	ENGLISH	EMERALD GROUP PUBLISHING LTD	2023	RAVI, H (CORRESPONDING AUTHOR), PRESIDENCY UNIV, SCH COMMERCE & ECON, BANGALORE, INDIA.	2515-8961	INNOVATION & MANAGEMENT REVIEW	0	BLOCKCHAIN AN EOM APPROACH TO RECONCILIATION IN BANKING	20	ISI	PRESIDENCY UNIVERSITY, BANGALORE	PRESIDENCY UNIV	#N/A	VEDAPRADHA R, 2023, INNOV MANAG REV	VEDAPRADHA R, 2023, INNOV MANAG REV
VEUGER J, 2021, INT J APPL ECON FINANCE ACCOUNT	VEUGER J	VEUGER JAN	none	THE EXPLORATORY RESEARCH IN 2020 RECEIVED A LOT OF ATTENTION IN TRADE JOURNALS IN THE NETHERLANDS AND IN THE INTERNATIONAL CONTEXT OF ACADEMIC JOURNALS, WEBINARS AND CONFERENCES. THIS LED TO THIS RESEARCH IN 2021, INCLUDING A REORIENTATION ON THE STRUCTURE OF THE RESEARCH. DUE TO THE FURTHER DEVELOPMENT OF THE FACULTY IN 2020 AND 2021, THE QUESTIONS FROM THE RESEARCH WERE FURTHER PROFESSIONALIZED…	#N/A	#N/A	UNIVERSITY OF APPLIED SCIENCES SCHOOL OF FINANCE AND ACCOUNTING, SCHOOL OF CREATIVE TECHNOLOGY, SCHOOL OF GOVERNANCE, LAW AND URBAN DEVELOPMENT, HOSPITALITY BUSINESS SCHOOL, SCHOOL OF COMMERCE AND ENTREPENEURSHIP, SCHOOL OF PEOPLE AND SOCIETY, NETHERLANDS;	BITCOIN; BLOCKCHAIN; DIGITIZATION; FINANCIAL; PROFESSIONAL	10.33094/8.2017.2021.111.1.22	ARTICLE	#N/A	INT J APPL ECON FINANCE ACCOUNT	INT. J. APPL. ECON. FINANCE. ACCOUNT.	ENGLISH	ONLINE ACADEMIC PRESS	2021	J. VEUGER; UNIVERSITY OF APPLIED SCIENCES SCHOOL OF FINANCE AND ACCOUNTING-SCHOOL OF CREATIVE TECHNOLOGY, SCHOOL OF GOVERNANCE, LAW AND URBAN DEVELOPMENT, HOSPITALITY BUSINESS SCHOOL, SCHOOL OF COMMERCE AND ENTREPENEURSHIP, SCHOOL OF PEOPLE AND SOCIETY, NETHERLANDS; EMAIL: J.VEUGER@SAXION.NL	2577767X	INTERNATIONAL JOURNAL OF APPLIED ECONOMICS, FINANCE AND ACCOUNTING	1	DIGITIZATION AND BLOCKCHAIN IN FINANCE THE NETHERLANDS IN 2020 AND 2021	11	ISI	UNIVERSITY OF APPLIED SCIENCES SCHOOL OF FINANCE AND ACCOUNTING-SCHOOL OF CREATIVE TECHNOLOGY	NOTREPORTED;UNIVERSITY OF APPLIED SCIENCES SCHOOL OF FINANCE AND ACCOUNTING-SCHOOL OF CREATIVE TECHNOLOGY;NOTREPORTED	#N/A	VEUGER J, 2021, INT J APPL ECON FINANCE ACCOUNT	VEUGER J, 2021, INT J APPL ECON FINANCE ACCOUNT
VICIC J, 2022, J THEOR APPL EL COMM	VICIC J; TOSIC A	VICIC, JERNEJ; TOSIC, ALEKSANDAR	ALEXANDER J, 2009, REMARKS USE BENFORDS, DOI 10.2139/SSRN.1505147, DOI 10.2139/SSRN.1505147; BACK H, 2019, INT CONF UBIQ FUTUR, P713, DOI 10.1109/ICUFN.2019.8806126, 10.1109/ICUFN.2019.8806126; BAUM S, 2018, BACHELOR'S THESIS; BENFORD F, 1938, PROC. AM. PHILOS. SOC., V78, P551; BERGER A, 2011, PROBAB SURV, V8, P1, DOI 10.1214/11-PS175; BERGER V, 2014, KOLMOGOROV SMIRNOV T; BRENIG C, 2015, P ECIS …	THE MANUSCRIPT PRESENTS A STUDY OF THE POSSIBILITY OF USE OF BENFORD'S LAW CONFORMITY TEST, A WELL PROVEN TOOL IN THE ACCOUNTING FRAUD DISCOVERY, ON A NEW DOMAIN: THE DISCOVERY OF ANOMALIES (POSSIBLY FRAUDULENT BEHAVIOUR) IN THE THE CRYPTOCURRENCY TRANSACTIONS. BLOCKCHAIN-BASED CURRENCIES OR CRYPTOCURRENCIES HAVE BECOME A GLOBAL PHENOMENON KNOWN TO MOST PEOPLE AS A DISRUPTIVE TECHNOLOGY, AND A NE…	#N/A	#N/A	UNIVERSITY PRIMORSKA, FAC MATH NAT SCI & INFORMAT TECHNOL, KOPER 6000, SLOVENIA; SLOVENIAN ACAD SCI & ARTS, FRAN RAMOVS INST, RES CTR, LJUBLJANA 1000, SLOVENIA; INNORENEW COE, IZOLA 6310, SLOVENIA;	CRYPTOCURRENCY; BENFORD'S LAW; ANOMALY DETECTION; METHOD APPLICATION	10.3390/jtaer17010016	ARTICLE	DIGITAL ANALYSIS	J THEOR APPL EL COMM	J. THEOR. APPL. ELECTRON. COMMER. RES.	ENGLISH	MDPI	2022	VICIC, J (CORRESPONDING AUTHOR), UNIV PRIMORSKA, FAC MATH NAT SCI & INFORMAT TECHNOL, KOPER 6000, SLOVENIA.; VICIC, J (CORRESPONDING AUTHOR), SLOVENIAN ACAD SCI & ARTS, FRAN RAMOVS INST, RES CTR, LJUBLJANA 1000, SLOVENIA.	0718-1876	JOURNAL OF THEORETICAL AND APPLIED ELECTRONIC COMMERCE RESEARCH	3	APPLICATION OF BENFORDS LAW ON CRYPTOCURRENCIES	17	ISI	UNIVERSITY OF PRIMORSKA; SLOVENIAN ACADEMY OF SCIENCES AND ARTS (SASA); FRAN RAMOVS INSTITUTE FOR THE SLOVENIAN LANGUAGE, SASA	UNIV PRIMORSKA;FRAN RAMOVS INST	#N/A	VICIC J, 2022, J THEOR APPL EL COMM	VICIC J, 2022, J THEOR APPL EL COMM
VINCENT NE, 2020, CURR ISS AUDIT	VINCENT N; WILKINS A	VINCENT, NISHANI EDIRISINGHE; WILKINS, ANNE M.	ACCOUNTING BLOCKCHAIN COALITION, 2019, PAN DISC AUD TOK MIN; AQUILIO M, 2018, COURT GRANTS IRS SUM; CPA CANADA, 2018, AUD CONS REL CRYPT A; CPA CANADA, 2018, INTR ACC CRYPT IFRS; FINANCIAL ACCOUNTING STANDARDS BOARD (FASB), 2014, INT GOODW OTH ACC ST; INTERNATIONAL ACCOUNTING STANDARDS BOARD ( IASB), 2004, INTANGIBLE ASSETS; INTERNATIONAL FINANCIAL REPORTING INTERPRETATIONS COMMITTEE (IFRIC), 201…	THE NOVELTY, AMBIGUITY, AND THE LACK OF OFFICIAL GUIDANCE SURROUNDING CRYPTO-CURRENCY TRANSACTIONS IMPOSE ADDITIONAL AUDIT RISKS THAT SHOULD BE CONSIDERED DURING CLIENT ACCEPTANCE AND RETENTION AND PLANNING AUDIT PROCEDURES. WE DEVELOP A FOUR-QUADRANTMODEL TO ASSIST AUDITORS IN CLIENT ACCEPTANCE AND CONTINUANCE DECISIONS AND IDENTIFY CRYPTOCURRENCY RISKS THAT SHOULD BE CONSIDERED DURING AUDIT PLA…	#N/A	#N/A	UNIVERSITY TENNESSEE CHATTANOOGA, CHATTANOOGA, TN 37403, USA;	CRYPTOCURRENCY; AUDITING; CLIENT ACCEPTANCE AND RETENTION; RISK	10.2308/ciia-52675	ARTICLE	#N/A	CURR ISS AUDIT	CURR. ISS. AUDIT.	ENGLISH	AMER ACCOUNTING ASSOC	2020	VINCENT, NE (CORRESPONDING AUTHOR), UNIV TENNESSEE CHATTANOOGA, CHATTANOOGA, TN 37403 USA.	1936-1270	CURRENT ISSUES IN AUDITING	15	CHALLENGES WHEN AUDITING CRYPTOCURRENCIES	14	ISI	UNIVERSITY OF TENNESSEE SYSTEM; UNIVERSITY OF TENNESSEE AT CHATTANOOGA	UNIV TENNESSEE CHATTANOOGA	#N/A	VINCENT NE, 2020, CURR ISS AUDIT	VINCENT NE, 2020, CURR ISS AUDIT
VINCENT NE, 2022, J EMERG TECHNOL ACCO	VINCENT N; DAVENPORT S	VINCENT, NISHANI EDIRISINGHE; DAVENPORT, STEPHAN A.	ANONYMOUS, 2017, US COINBASE INC; ANONYMOUS, 2018, IFRS ACC CRYPT ASS; ANTONOVICI A, 2020, 36 US SMES NOW ACCEP; APPELBAUM D, 2020, J INF SYST, V34, P5, DOI 10.2308/ISYS-52660; CAO S, 2020, PAYPAL MAY START SEL; COYNE J, 2017, J EMERG TECHNOL ACCO, V14, P101, DOI 10.2308/JETA-51910; DAI J, 2019, J EMERG TECHNOL ACCO, V16, P23, DOI 10.2308/JETA-52482; DAI J, 2017, J INF SYST, V31, P5, DOI 10.2308/…	DURING RECENT YEARS, CRYPTOCURRENCY HAS GAINED THE ATTENTION OF MANY LARGE COMPANIES SUCH AS FACEBOOK, EXPEDIA, APPLE, AND OVERSTOCK TO NAME A FEW. THE ACCEPTANCE AND USE OF CRYPTOCURRENCY IN BUSINESS TRANSACTIONS CAN HAVE A MAJOR IMPACT ON A COMPANY'S ACCOUNTING SYSTEM. HOWEVER, ACCOUNTING RESEARCH EXPLORING ISSUES RELATED TO CRYPTOCURRENCIES IS SPARSE. THEREFORE, WE IDENTIFY RESEARCH QUESTIONS …	#N/A	#N/A	UNIVERSITY TENNESSEE, CHATTANOOGA, TN, USA; UNIVERSITY TENNESSEE, CHATTANOOGA, GARY W ROLLINS COLL BUSINESS, DEPT ACCOUNTING, CHATTANOOGA, TN 37403, USA;	BITCOIN; CRYPTOCURRENCY; ACCOUNTING; BLOCKCHAIN	10.2308/JETA-19-11-14-46	ARTICLE	FINANCIAL-STATEMENT PRESENTATION; BLOCKCHAIN; TECHNOLOGY	J EMERG TECHNOL ACCO	J. EMERG. TECHNOL. ACCOUNT.	ENGLISH	AMER ACCOUNTING ASSOC	2022	VINCENT, NE (CORRESPONDING AUTHOR), UNIV TENNESSEE CHATTANOOGA, GARY W ROLLINS COLL BUSINESS, DEPT ACCOUNTING, CHATTANOOGA, TN 37403 USA.	1554-1908	JOURNAL OF EMERGING TECHNOLOGIES IN ACCOUNTING	2	ACCOUNTING RESEARCH OPPORTUNITIES FOR CRYPTOCURRENCIES	19	ISI	UNIVERSITY OF TENNESSEE SYSTEM; UNIVERSITY OF TENNESSEE AT CHATTANOOGA; UNIVERSITY OF TENNESSEE SYSTEM; UNIVERSITY OF TENNESSEE AT CHATTANOOGA	UNIV TENNESSEE CHATTANOOGA	#N/A	VINCENT NE, 2022, J EMERG TECHNOL ACCO	VINCENT NE, 2022, J EMERG TECHNOL ACCO
VODÁKOVÁ J, 2020, EDUCATION EXCELLENCE AND INNOVATION MANAGEMENT: A 2025 VISION TO SUSTAIN ECONOMIC DEVELOPMENT DURING GLOBAL CHALLENGES	VODÁKOVÁ J; FOLTYN J	VODAKOVA, JANA; FOLTYN, JIRI	BAFIN - BUNDESANSTALT FUR FINANZDIENSTLEISTUNGSAUFSICHT, 2013, BITC AUFS BEW RIS NU; CESKA NARODNI BANKA, 2014, OBCH S BITC; EUROPEAN CENTRAL BANK, 2012, VIRT CURR SCHEM; IFRS. INTERPRETATIONS COMMITTEE, 2019, 12 IFRS; LANSKY J, 2018, JOURNAL OF SYSTEMS INTEGRATION, P19, DOI 10.20470/JSI.V9I1.335, DOI 10.20470/JSI.V9I1.335; MARTINAK T, 2015, BEZHOTOVOSTNI PENIZE; MAZARS, 2019, BITC CRYPT FIN STAT…	THIS PAPER DEALS WITH CRYPTOCURRENCIES AND THEIR FINANCIAL REPORTING IN SELECTED EUROPEAN COUNTRIES, I.E. THE CZECH REPUBLIC, THE SLOVAK REPUBLIC, AND THE FEDERAL REPUBLIC OF GERMANY. ITS MAIN AIM IS TO COMPARE AND DISCUSS ATTITUDE TO FINANCIAL REPORTING OF CRYPTOCURRENCIES IN THREE SELECTED EUROPEAN COUNTRIES. FIRSTLY, INTERPRETATION AND CHARACTERISTICS OF CRYPTOCURRENCIES IS INTRODUCED. FURTHER…	SOLIMAN, KS	978-0-9998551-4-0	MASARYK UNIVERSITY, FAC ECON & ADM, BRNO, CZECH REPUBLIC;	CRYPTOCURRENCY; BITCOIN; FINANCIAL REPORTING; IAS; IFRS	#N/A	PROCEEDINGS PAPER	#N/A	EDUCATION EXCELLENCE AND INNOVATION MANAGEMENT: A 2025 VISION TO SUSTAIN ECONOMIC DEVELOPMENT DURING GLOBAL CHALLENGES	#N/A	ENGLISH	INT BUSINESS INFORMATION MANAGEMENT ASSOC-IBIMA	2020	VODÁKOVÁ, J (CORRESPONDING AUTHOR), MASARYK UNIV, FAC ECON & ADM, BRNO, CZECH REPUBLIC.	#N/A	EDUCATION EXCELLENCE AND INNOVATION MANAGEMENT: A 2025 VISION TO SUSTAIN ECONOMIC DEVELOPMENT DURING GLOBAL CHALLENGES	1	FINANCIAL REPORTING OF CRYPTOCURRENCIES	#N/A	ISI	MASARYK UNIVERSITY BRNO	MASARYK UNIV	#N/A	VODÁKOVÁ J, 2020, EDUCATION EXCELLENCE AND INNOVATION MANAGEMENT: A 2025 VISION TO SUSTAIN ECONOMIC DEVELOPMENT DURING GLOBAL CHALLENGES	VODÁKOVÁ J, 2020, EDUCATION EXCELLENCE AND INNOVATION MANAGEMENT: A 2025 VISION TO SUSTAIN ECONOMIC DEVELOPMENT DURING GLOBAL CHALLENGES
VODÁKOVÁ J, 2020, EDUCATION EXCELLENCE AND INNOVATION MANAGEMENT: A 2025 VISION TO SUSTAIN ECONOMIC DEVELOPMENT DURING GLOBAL CHALLENGES-a	VODÁKOVÁ J; FOLTYN J	VODAKOVA, JANA; FOLTYN, JIRI	BAFIN - BUNDESANSTALT FUR FINANZDIENSTLEISTUNGSAUFSICHT, 2013, BITC AUFS BEW RIS NU; BAGIOVA A, 2018, FINANCIE UCTOVNICTVO; IFRS. INTERPRETATIONS COMMITTEE, 2019, 12 IFRS INT COMM; JELINEK M, 2018, ZDANENI DANOVA OPTIM; KIRSCHBAUM B, 2017, CRYPTOCURRENCIES WIL; KOCOURKOVA T, 2017, DANOVE UCETNI ASPEKT; LANSKY J, 2018, JOURNAL OF SYSTEMS INTEGRATION, P19, DOI 10.20470/JSI.V9I1.335, DOI 10.20470/JS…	THE MAIN AIM OF THIS PAPER IS TO ANALYSE AND COMPARE VALUATION BASES USED FOR CRYPTOCURRENCIES PRICING IN THREE SELECTED EUROPEAN COUNTRIES, I.E. THE CZECH REPUBLIC, THE SLOVAK REPUBLIC, AND THE FEDERAL REPUBLIC OF GERMANY. AMONG OTHERS, FAIR AND TRUE DISCLOSURE OF CRYPTOCURRENCIES IN FINANCIAL STATEMENTS, IS INFLUENCED BY VALUATION TECHNIQUES USED. THAT IS WHY OUR PAPER ANALYSES AND COMPARES ATT…	SOLIMAN, KS	978-0-9998551-4-0	MASARYK UNIVERSITY, FAC ECON & ADM, BRNO, CZECH REPUBLIC;	CRYPTOCURRENCY; BITCOIN; VALUATION; VALUATION BASIS OF CRYPTOCURRENCY; IAS; IFRS	#N/A	PROCEEDINGS PAPER	#N/A	EDUCATION EXCELLENCE AND INNOVATION MANAGEMENT: A 2025 VISION TO SUSTAIN ECONOMIC DEVELOPMENT DURING GLOBAL CHALLENGES	#N/A	ENGLISH	INT BUSINESS INFORMATION MANAGEMENT ASSOC-IBIMA	2020	VODÁKOVÁ, J (CORRESPONDING AUTHOR), MASARYK UNIV, FAC ECON & ADM, BRNO, CZECH REPUBLIC.	#N/A	EDUCATION EXCELLENCE AND INNOVATION MANAGEMENT: A 2025 VISION TO SUSTAIN ECONOMIC DEVELOPMENT DURING GLOBAL CHALLENGES	1	VALUATION OF CRYPTOCURRENCIES IN SELECTED EU COUNTRIES	#N/A	ISI	MASARYK UNIVERSITY BRNO	MASARYK UNIV	#N/A	VODÁKOVÁ J, 2020, EDUCATION EXCELLENCE AND INNOVATION MANAGEMENT: A 2025 VISION TO SUSTAIN ECONOMIC DEVELOPMENT DURING GLOBAL CHALLENGES	VODÁKOVÁ J, 2020, EDUCATION EXCELLENCE AND INNOVATION MANAGEMENT: A 2025 VISION TO SUSTAIN ECONOMIC DEVELOPMENT DURING GLOBAL CHALLENGES-a
VOLOSOVYCH S, 2018, BANKS BANK SYST	VOLOSOVYCH S; BARANIUK Y	VOLOSOVYCH SVITLANA; BARANIUK YURII	none	THE CURRENT GLOBAL FINANCIAL MARKET IS WITNESSING THE ACTIVATION OF CRYPTOCURRENCY AS A PAYMENT INSTRUMENT AND A MEANS OF ACCUMULATION. HOWEVER, THE RISKS OF MONEY LAUNDERING, TERRORISM FINANCING AND TAX EVASION THAT CRYPTOCURRENCY TRANSACTIONS IMPLY LEAD TO THE NEED TO IMPLEMENT THEIR STATE REGULATION, AN IMPORTANT COMPONENT OF WHICH IS TAX CONTROL. THEREFORE, THE PURPOSE OF THE ARTICLE IS TO SU…	#N/A	#N/A	KYIV NATIONAL UNIVERSITY OF TRADE AND ECONOMICS, DEPARTMENT OF FINANCE, UKRAINE; KYIV NATIONAL UNIVERSITY OF TRADE AND ECONOMICS, DEPARTMENT OF FINANCE, UKRAINE;	CRYPTOCURRENCY; TRANSACTIONS; MINING; TAXATION; TAX CONTROL; TAX CONTROL OBJECT; TAX CONTROL SUBJECT	10.21511/bbs.13(2).2018.08	ARTICLE	#N/A	BANKS BANK SYST	BANKS BANK SYST.	ENGLISH	LLC CPC BUSINESS PERSPECTIVES	2018	#N/A	18167403	BANKS AND BANK SYSTEMS	8	TAX CONTROL OF CRYPTOCURRENCY TRANSACTIONS IN UKRAINE	13	ISI	KYIV NATIONAL UNIVERSITY OF TRADE AND ECONOMICS;KYIV NATIONAL UNIVERSITY OF TRADE AND ECONOMICS	KYIV NATIONAL UNIVERSITY OF TRADE AND ECONOMICS;KYIV NATIONAL UNIVERSITY OF TRADE AND ECONOMICS	#N/A	VOLOSOVYCH S, 2018, BANKS BANK SYST	VOLOSOVYCH S, 2018, BANKS BANK SYST
VUMAZONKE N, 2023, S AFR J ECON MANAG S	VUMAZONKE N; PARSONS S	VUMAZONKE, NAMHLA; PARSONS, SHAUN	AMADEO K, 2020, BALANCE; ANONYMOUS, 2014, REV CUST BRIEF 9 201; ANONYMOUS, 1975, NATAL ESTATES LTD SE; ANONYMOUS, TAX ADM ACT NO 28 20; ANONYMOUS, 1997, COMMISSIONER INLAND; ANONYMOUS, MALAN KOMMISSARIS BI; ANONYMOUS, 1992, COMMISSIONER FOR INLAND REVENUE V FRIEDMAN AND OTHERS NNO; ANONYMOUS, INC TAX ACT NO 58 19; ANONYMOUS, 2011, MEASURING FINANCIAL LITERACY: CORE QUESTIONNAIRE IN MEASURING FINA…	BACKGROUND: A MEDIA STATEMENT ISSUED BY THE SOUTH AFRICAN REVENUE SERVICE (SARS) IN 2018 REPRESENTS THE PRIMARY GUIDANCE AVAILABLE TO SOUTH AFRICAN TAXPAYERS ON THE INCOME TAX CONSEQUENCES OF CRYPTO ASSET TRANSACTIONS.AIM: THIS STUDY ASSESSED THE ADEQUACY OF THE GUIDELINES AVAILABLE TO SOUTH AFRICAN TAXPAYERS ON THE CONSEQUENCES OF CRYPTO ASSET TRANSACTIONS, AND IDENTIFIED THE INCOME TAX CONSEQUE…	#N/A	#N/A	UNIVERSITY CAPE TOWN, COLL ACCOUNTING, FAC COMMERCE, CAPE TOWN, SOUTH AFRICA;	CRYPTOCURRENCY; CRYPTO ASSETS; INCOME TAX; REVENUE SERVICE; TAX LITERACY; TAX COMPLIANCE; TAXATION	10.4102/sajems.v26i1.4832	ARTICLE	#N/A	S AFR J ECON MANAG S	S. AFR. J. ECON. MANAG. SCI.	ENGLISH	AOSIS	2023	PARSONS, S (CORRESPONDING AUTHOR), UNIV CAPE TOWN, COLL ACCOUNTING, FAC COMMERCE, CAPE TOWN, SOUTH AFRICA.	1015-8812	SOUTH AFRICAN JOURNAL OF ECONOMIC AND MANAGEMENT SCIENCES	0	AN ANALYSIS OF SOUTH AFRICAS GUIDANCE ON THE INCOME TAX CONSEQUENCES OF CRYPTO ASSETS	26	ISI	UNIVERSITY OF CAPE TOWN	UNIV CAPE TOWN	#N/A	VUMAZONKE N, 2023, S AFR J ECON MANAG S	VUMAZONKE N, 2023, S AFR J ECON MANAG S
YAN HQ, 2022, J RISK FINANC MANAG	YAN H; YAN K; GUPTA R	YAN, HUQIN; YAN, KEJIA; GUPTA, RAKESH	ALSTOM HOLDINGS, 2019, REAS RPV311 TECHN MA; BARCKOW A, 2019, IFRS INT COMM M JUN; ANONYMOUS, 2020, XIAMEN CITY FEDERATI; ANONYMOUS, 2017, CSRC ANN PREV FIN RI; ANONYMOUS, 2013, CSRC CIRC PREV RISKS; KOGASAKA A, 2019, IFRS INT COMM M JUN; BLOCKCHAIN.COM, 2020, BLOCKCHAIN; HAIT C, 2019, IFRS INT COMM M JUN; CGTN, 2019, CHIN GLOB TEL NETW C; HARDIDGE D, 2019, IFRS INT COMM M JUN; HAYGARTH E, 2019, …	THIS IS THE FIRST SURVEY CONDUCTED IN CHINA ON THE HOLDING OF CRYPTOCURRENCIES. ALTHOUGH CRYPTOCURRENCIES HAVE EXISTED IN THE WORLD FOR MORE THAN A DECADE, BECAUSE THE EXCHANGE OF CRYPTOCURRENCIES IS BANNED IN CHINA, THERE IS NO GUIDANCE ON THE HOLDING OF CRYPTOCURRENCIES IN CHINA'S ACCOUNTING STANDARDS. MOREOVER, ALTHOUGH THE EXCHANGE OF CRYPTOCURRENCIES IS PROHIBITED BY THE CHINESE GOVERNMENT, …	#N/A	#N/A	XIAMEN NATIONAL ACCOUNTING INST, XIAMEN 361005, CHINA; XIAMEN UNIVERSITY, SCH MANAGEMENT, XIAMEN 361009, CHINA; GRIFFITH UNIVERSITY, DEPT ACCOUNTING FINANCE & ECON, NATHAN, QLD 4111, AUSTRALIA;	CRYPTOCURRENCY; FINANCIAL REPORTING	10.3390/jrfm15040175	ARTICLE	#N/A	J RISK FINANC MANAG	J. RISK FINANC. MANAG.	ENGLISH	MDPI	2022	YAN, KJ (CORRESPONDING AUTHOR), XIAMEN UNIV, SCH MANAGEMENT, XIAMEN 361009, PEOPLES R CHINA.	1911-8066	JOURNAL OF RISK AND FINANCIAL MANAGEMENT	1	A SURVEY OF THE ACCOUNTING INDUSTRY ON HOLDINGS OF CRYPTOCURRENCIES IN XIAMEN CITY CHINA	15	ISI	XIAMEN NATIONAL ACCOUNTING INSTITUTE; XIAMEN UNIVERSITY; GRIFFITH UNIVERSITY	XIAMEN UNIV	#N/A	YAN HQ, 2022, J RISK FINANC MANAG	YAN HQ, 2022, J RISK FINANC MANAG
YANG L, 2021, INT REV FINANC ANAL	YANG L; HAMORI S	YANG, LU; HAMORI, SHIGEYUKI	AKHTARUZZAMAN M, 2021, ECON MODEL, V102, DOI 10.1016/J.ECONMOD.2021.105588; ANONYMOUS, 2021, DIGICONOMIST; BALCILAR M, 2016, ENERG ECON, V54, P159, DOI 10.1016/J.ENECO.2015.11.003; BAUR D, 2018, J INT FINANC MARK I, V54, P177, DOI 10.1016/J.INTFIN.2017.12.004; BAUR D, 2010, FINAN REV, V45, P217, DOI 10.1111/J.1540-6288.2010.00244.X; BAUR D, 2010, J BANK FINANC, V34, P1886, DOI 10.1016/J.JBANKFIN.…	THE ROLE OF THE CARBON MARKET IN RELATION TO THE CRYPTOCURRENCY MARKET IS STILL UNCLEAR. GIVEN THE CARBON-INTENSIVE NATURE OF THE CRYPTOCURRENCY INDUSTRY, WHETHER THE CARBON MARKET IS ABLE TO CAPTURE THE CARBON FOOTPRINT OF THE CRYPTOCURRENCY MARKET (I.E., DIVERSIFICATION) OR ACT AS A SAFE HAVEN OR A HEDGE AGAINST IT REMAIN UNEXPLORED ISSUES. TO ADDRESS THIS ISSUE, THIS PAPER EMPLOYS THE GENERALI…	#N/A	#N/A	SHENZHEN UNIVERSITY, COLL ECON, 3688 NANHAI AVE, SHENZHEN 518060, GUANGDONG, CHINA; KOBE UNIVERSITY, GRAD SCH ECON, NADA KU, KOBE, HYOGO 6578501, JAPAN;	CARBON MARKET; CRYPTOCURRENCY; SAFE HAVEN; ASYMMETRIC TAIL; GAS-DCS-COPULA	10.1016/j.irfa.2021.101864	ARTICLE	SAFE-HAVEN; FAT TAILS; BITCOIN; ENERGY; GOLD; VOLATILITY; HEDGE; PRICE; SPILLOVER; RISK	INT REV FINANC ANAL	INT. REV. FINANC. ANAL.	ENGLISH	ELSEVIER SCIENCE INC	2021	HAMORI, S (CORRESPONDING AUTHOR), KOBE UNIV, GRAD SCH ECON, NADA KU, KOBE, HYOGO 6578501, JAPAN.	1057-5219	INTERNATIONAL REVIEW OF FINANCIAL ANALYSIS	42	THE ROLE OF THE CARBON MARKET IN RELATION TO THE CRYPTOCURRENCY MARKET ONLY DIVERSIFICATION OR MORE	77	ISI	SHENZHEN UNIVERSITY; KOBE UNIVERSITY	KOBE UNIV	#N/A	YANG L, 2021, INT REV FINANC ANAL	YANG L, 2021, INT REV FINANC ANAL
YATSYK T, 2020, ECON ANN-XXI	YATSYK T; SHVETS V	YATSYK, TETIANA; SHVETS, VIKTOR	ALQARYOUTI O, 2020, INFORMATION SYSTEMS. 16TH EUROPEAN, MEDITERRANEAN, AND MIDDLE EASTERN CONFERENCE, EMCIS 2019. PROCEEDINGS. LECTURE NOTES IN BUSINESS INFORMATION PROCESSING (LNBIP 381), P123, DOI 10.1007/978-3-030-44322-1_10; ANKENBRAND T, 2020, 2020 CRYPTO VALLEY CONFERENCE ON BLOCKCHAIN TECHNOLOGY (CVCBT 2020), P16, DOI 10.1109/CVCBT50464.2020.00006; ARSLANIAN H, 2019, FUTURE FINANCE, P312, …	INTRODUCTION. CURRENTLY, THERE IS NO SINGLE, UNIFIED FRAMEWORK FOR THE CLASSIFICATION OF CRYPTOASSETS. CONSEQUENTLY, THERE IS NO GENERALLY APPLIED DEFINITION OF NEITHER CRYPTOASSETS, NOR DIGITAL TOKENS, DUE TO THE VARIETY OF FEATURES AND BESPOKE NATURE OF THE TRANSACTIONS IN PRACTICE. THE OBJECTIVE OF THIS PAPER IS TO DEFINE THE ESSENCE OF CRYPTOASSETS IN THE FINANCIAL ACCOUNTING, IDENTIFY ATTRIB…	#N/A	#N/A	TARAS SHEVCHENKO NATIONAL UNIVERSITY KYIV, 90A VASYLKIVSKA STR, UA-03022 KIEV, UKRAINE;	CRYPTO ASSETS; DISTRIBUTED LEDGER TECHNOLOGY; CRYPTOCURRENCY; FINANCIAL ACCOUNTING; INTANGIBLE ASSETS; DIGITAL TOKEN; ICO	10.21003/ea.V183-10	ARTICLE	#N/A	ECON ANN-XXI	ECON. ANN.-XXI	ENGLISH	INST SOC TRANSFORMATION	2020	YATSYK, T (CORRESPONDING AUTHOR), TARAS SHEVCHENKO NATL UNIV KYIV, 90A VASYLKIVSKA STR, UA-03022 KIEV, UKRAINE.	1728-6220	ECONOMIC ANNALS-XXI	3	CRYPTOASSETS AS AN EMERGING CLASS OF DIGITAL ASSETS IN THE FINANCIAL ACCOUNTING	183	ISI	MINISTRY OF EDUCATION AND SCIENCE OF UKRAINE; TARAS SHEVCHENKO NATIONAL UNIVERSITY OF KYIV	TARAS SHEVCHENKO NATL UNIV KYIV	#N/A	YATSYK T, 2020, ECON ANN-XXI	YATSYK T, 2020, ECON ANN-XXI
YEE TS, 2020, MANAG ACCOUNT REVIEW	YEE T; HEONG A; CHIN W	YEE TEH SIN; HEONG ANGELINE YAP KIEW; CHIN WONG SIEW	none	CRYPTOCURRENCIES HAVE BECOME THE BUZZWORD AMONG SOCIETY, ESPECIALLY AFTER SOME PROMINENT COMPANIES SUCH AS WIKIPEDIA, MICROSOFT AND AMAZON ACCEPT THE USE OF CRYPTOCURRENCIES. NONETHELESS, ACCOUNTING TREATMENT OF CRYPTOCURRENCIES APPEARS TO BE A CHALLENGING AREA FOR STANDARD SETTERS, FINANCIAL STATEMENT PREPARERS, AND ALSO USERS. THIS IS MAINLY BECAUSE ELEMENTS OF CRYPTOCURRENCY DO NOT EXPLICITLY …	#N/A	#N/A	HELP UNIVERSITY, KUALA LUMPUR, MALAYSIA;	ACCOUNTING; CRYPTOCURRENCY	#N/A	ARTICLE	#N/A	MANAG ACCOUNT REVIEW	MANAG. ACCOUNT. REVIEW	ENGLISH	UNIVERSITI TEKNOLOGI MARA	2020	T.S. YEE; FACULTY OF BUSINESS, ECONOMICS AND ACCOUNTING AND ECONOMIC, HELP UNIVERSITY, KUALA LUMPUR, 50490, MALAYSIA; EMAIL: SINYEE_417@HOTMAIL.COM	26007975	MANAGEMENT AND ACCOUNTING REVIEW	3	ACCOUNTING TREATMENT OF CRYPTOCURRENCY A MALAYSIAN CONTEXT	19	ISI	HELP UNIVERSITY	NOTREPORTED;HELP UNIVERSITY;NOTREPORTED	#N/A	YEE TS, 2020, MANAG ACCOUNT REVIEW	YEE TS, 2020, MANAG ACCOUNT REVIEW
YU T, 2018, J CORP ACCOUNT FINAN	YU T; LIN Z; TANG Q	YU, TING; LIN, ZHIWEI; TANG, QINGLIANG	ANONYMOUS, 2015, THE ECONOMIST; ANTONOPOULOS A, 2017, OREILLY MEDIA; CHRISTENSEN H, 2017, J ACCOUNT ECON, V64, P284, DOI 10.1016/J.JACCECO.2017.08.001; DRAKE M, 2016, J ACCOUNT ECON, V61, P448, DOI 10.1016/J.JACCECO.2015.12.001; FEDYK A, 2017, WORKING PAPER; HAIL L, 2017, WORKING PAPER; HEALY P, 1999, ACCOUNTING HORIZONS, V13, P365, DOI DOI 10.2308/ACCH.1999.13.4.365; HEALY P, 2001, J ACCOUNT ECO…	BLOCKCHAIN, AS A DECENTRALIZED LEDGER TECHNOLOGY WITH CHARACTERISTICS OF TRANSPARENT, SECURE, PERMANENT AND IMMUTABLE, HAS BEEN APPLIED IN MANY FIELDS SUCH AS CRYPTOCURRENCY, EQUITY FINANCING, AND CORPORATE GOVERNANCE. HOWEVER, THE BLOCKCHAIN TECHNOLOGY IS IN THE EXPERIMENTAL STAGE AND HAS SEVERAL PROBLEMS TO BE SOLVED INCLUDING LIMITED DATA PROCESSING CAPACITY, INFORMATION CONFIDENTIALITY, AND R…	#N/A	#N/A	UNIVERSITY MANCHESTER, MANCHESTER, LANCS, UNITED KINGDOM; SCH SOCIAL SCI, ECON & FINANCE, MANCHESTER, LANCS, UNITED KINGDOM; SHENZHEN UNIVERSITY, SCH ECON, SHENZHEN, CHINA; WESTERN SYDNEY UNIVERSITY, DISCIPLINE ACCOUNTING, SYDNEY, NSW, AUSTRALIA; CARBON ACCOUNTING SUSTAINABIL ACCOUNTING LAW & EC, SYDNEY, NSW, AUSTRALIA;	BLOCKCHAIN; ACCOUNTING; AUDITING	10.1002/jcaf.22365	ARTICLE	INFORMATION; DISCLOSURE; FIRM	J CORP ACCOUNT FINAN	J. CORP. ACCOUNT. FINANC.	ENGLISH	WILEY PERIODICALS, INC	2018	YU, T (CORRESPONDING AUTHOR), UNIV MANCHESTER, MANCHESTER, LANCS, ENGLAND.; YU, T (CORRESPONDING AUTHOR), SCH SOCIAL SCI, ECON & FINANCE, MANCHESTER, LANCS, ENGLAND.	1044-8136	JOURNAL OF CORPORATE ACCOUNTING AND FINANCE	52	BLOCKCHAIN THE INTRODUCTION AND ITS APPLICATION IN FINANCIAL ACCOUNTING	29	ISI	UNIVERSITY OF MANCHESTER; SHENZHEN UNIVERSITY; WESTERN SYDNEY UNIVERSITY	UNIV MANCHESTER;SCH SOCIAL SCI	#N/A	YU T, 2018, J CORP ACCOUNT FINAN	YU T, 2018, J CORP ACCOUNT FINAN
ZADOROZHNYI ZM, 2022, MARK MANAG INNOV	ZADOROZHNYI Z; MURAVSKYI V; HUMENNA-DERIJ M; ZARUDNA N	ZADOROZHNYI, ZENOVII-MYKHAYLO; MURAVSKYI, VOLODYMYR; HUMENNA-DERIJ, MARIIA; ZARUDNA, NATALIIA	AKKUS H, 2022, JOURNAL OF ECONOMICS FINANCE AND ACCOUNTING, V9, P22; AL GNBRI M, 2021, ACCOUNT AUDIT ACCOUN; FERNANDEZ P, 2022, LIB HI TECH NEWS; FORTUNE BUSINESS INSIGHTS, 2022, MET MARK SIZ; HEMMATI M, 2022, METAVERSE URBAN REVO, V2, P49; HOLLENSEN S, 2023, JOURNAL OF BUSINESS STRATEGY, P119, DOI 10.1108/JBS-01-2022-0014; HUGHES I, 2022, ITNOW, V64, P22, DOI 10.1093/ITNOW/BWAC011, DOI 10.1093/I…	ACTIVE USE OF VIRTUAL ELECTRONIC INFORMATION ENVIRONMENTS - METAVERSES IS THE MOST PERSPECTIVE WAY OF INFORMATION AND COMMUNICATION TECHNOLOGIES DEVELOPMENT. IN THE META-ENVIRONMENT, TRADITIONAL ACCOUNTING OBJECTS UNDERGO SIGNIFICANT CHANGES DUE TO THEIR INTANGIBLE INTERPRETATION, WHICH REQUIRES IMPROVING THEIR ACCOUNTING AND AUDITING REFLECTION. ACCORDINGLY, THE PURPOSE OF THIS STUDY IS TO IMPRO…	#N/A	#N/A	WEST UKRAINIAN NATIONAL UNIVERSITY TERNOPOL, TERNOPOL OBLAST, UKRAINE;	ACCOUNTING; AUDITING; INTANGIBLE ASSETS; NFT; METAVERSE; RESOURCES; VIRTUAL DIGITAL INFORMATION ENVIRONMENT; IT COMPANIES	10.21272/mmi.2022.4-02	ARTICLE	#N/A	MARK MANAG INNOV	MARK. MANAG. INNOV.	ENGLISH	SUMY STATE UNIV, DEPT MARKETING & MANAGEMENT INNOVATIVE ACTIVITY	2022	MURAVSKYI, V (CORRESPONDING AUTHOR), WEST UKRAINIAN NATL UNIV, TERNOPOL, TERNOPIL OBLAST, UKRAINE.	2218-4511	MARKETING AND MANAGEMENT OF INNOVATIONS	0	INNOVATIVE ACCOUNTING AND AUDIT OF THE METAVERSE RESOURCES	#N/A	ISI	MINISTRY OF EDUCATION AND SCIENCE OF UKRAINE; WEST UKRAINIAN NATIONAL UNIVERSITY	WEST UKRAINIAN NATL UNIV	#N/A	ZADOROZHNYI ZM, 2022, MARK MANAG INNOV	ZADOROZHNYI ZM, 2022, MARK MANAG INNOV
ZADOROZHNYI ZMV, 2018, FINANC CREDIT ACT	ZADOROZHNYI Z; MURAYSKYI V; SHEVCHUK O	ZADOROZHNYI, Z-M, V; MURAYSKYI, V. V.; SHEVCHUK, O. A.	HONCHARUK M, 2012, PROBLEMY TEORII TA M, V2, P47; NEFODOV A, 2004, BUKHHALTERIIA ZBIRNY, V5, P193; NESTSHODSKY I, 2009, OBLIK I AUDYT, V4, P49; PETRUK O, 2017, VISNYK ZHSTU, V4, P48; PONOMARIV O, 2017, YAK PYSATY I VYMOVLI; RADCHENKO M, 2015, NAUKOVYI VISNYK UZHH, V1, P121; SAKHAROV P, 2017, MUKACHIVSKYI DERZHAV, V9, P1192; YATSYK T, 2017, MOLODYI VCHENYI, V2, P349	THE NEED TO OBTAIN PROMPT ACCESS TO FUNDS THROUGH ELECTRONIC COMMUNICATIONS, PROTECTING INVESTMENT AFTER THE GLOBAL FINANCIAL CRISIS HAS LED TO THE EMERGENCE OF A NEW TYPE OF ELECTRONIC MONEY - THE CRYPTOCURRENCIES. THE MODERN STATE AND PROSPECTS FOR DEVELOPMENT OF THE CRYPTOCURRENCY AS A SPECIAL KIND OF ELECTRONIC MONEY WERE EXPOUNDED. CRYPTOCURRENCIES GAIN SIGNIFICANT POPULARITY DUE TO THE ADVA…	#N/A	#N/A	TERNOPIL NATIONAL ECON UNIVERSITY, SCI WORK, TERNOPOL, UKRAINE; TERNOPIL NATIONAL ECON UNIVERSITY, TERNOPOL, UKRAINE;	MANAGAMENT ACCOUNTING; AUTOMATION OF ACCOUNTING; CRYPTOCURRENCY; ELECTRONIC MONEY; ELECTRONIC TRANSACTIONS	10.18371/fcaptp.v3i26.144368	ARTICLE	#N/A	FINANC CREDIT ACT	FINANC. CREDIT ACT.	ENGLISH	NATL BANK UKRAINE, UNIV BANKING, KHARKIV INST BANKING	2018	ZADOROZHNYI, ZMV (CORRESPONDING AUTHOR), TERNOPIL NATL ECON UNIV, SCI WORK, TERNOPOL, UKRAINE.	2306-4994	FINANCIAL AND CREDIT ACTIVITY-PROBLEMS OF THEORY AND PRACTICE	10	MANAGEMENT ACCOUNTING OF ELECTRONIC TRANSACTIONS WITH THE USE OF CRYPTOCURRENCIES	3	ISI	MINISTRY OF EDUCATION AND SCIENCE OF UKRAINE; WEST UKRAINIAN NATIONAL UNIVERSITY; MINISTRY OF EDUCATION AND SCIENCE OF UKRAINE; WEST UKRAINIAN NATIONAL UNIVERSITY	TERNOPIL NATL ECON UNIV	#N/A	ZADOROZHNYI ZMV, 2018, FINANC CREDIT ACT	ZADOROZHNYI ZMV, 2018, FINANC CREDIT ACT
ZAKARIA H, 2022, ACCOUNT FINANCE SUSTAIN GOV FRAUD	ZAKARIA H	ZAKARIA HESHAM	none	TAX ACCOUNTING DEPENDS ON MANY ASPECTS, DIMENSIONS, AND CONSTITUENTS THAT INTERACT TOGETHER IN ORDER TO ACHIEVE ITS MAIN GOAL, WHICH IS TO REACH THE DETERMINATION OF THE PROFIT OR THE TAX BASE ON WHICH THE TAX IS IMPOSED ACCORDING TO THE LAWS, LEGISLATION, AND REGULATIONS THAT GOVERN THIS, AND IN LIGHT OF THE ASPECTS OF TAX ACCOUNTING. SHORTCOMINGS RELATED TO ITS CURRENT, NON-RENEWABLE NATURE AND…	#N/A	#N/A	HIGHER INSTITUTE OF ADMINISTRATIVE SCIENCES, JANAKLIS, EGYPT;	CRYPTOCURRENCIES; ELECTRONIC ADVERTISING; ELECTRONIC COMMERCE; TAXATION	10.1007/978-981-19-1036-4_11	BOOK CHAPTER	#N/A	ACCOUNT FINANCE SUSTAIN GOV FRAUD	ACCOUNT. FINANCE SUSTAIN. GOV. FRAUD	ENGLISH	SPRINGER	2022	H. ZAKARIA; HIGHER INSTITUTE OF ADMINISTRATIVE SCIENCES, JANAKLIS, EGYPT; EMAIL: SHARK_H@HOTMAIL.COM	25097873	ACCOUNTING, FINANCE, SUSTAINABILITY, GOVERNANCE AND FRAUD	0	THE ROLE OF INTERNATIONAL TAX ACCOUNTING IN ASSESSING DIGITAL AND VIRTUAL TAX ISSUES	#N/A	ISI	HIGHER INSTITUTE OF ADMINISTRATIVE SCIENCES	NOTREPORTED;HIGHER INSTITUTE OF ADMINISTRATIVE SCIENCES;NOTREPORTED	#N/A	ZAKARIA H, 2022, ACCOUNT FINANCE SUSTAIN GOV FRAUD	ZAKARIA H, 2022, ACCOUNT FINANCE SUSTAIN GOV FRAUD
ZELIC D, 2018, EC SOC DEVELOP	ZELIC D; BAROS N	ZELIC, DRAGAN; BAROS, NENAD	ANTONOPOULOS A, 2014, ANTONOPOULOS MASTERI	LEGAL REGULATION OF CRYPTOCURRENCY IS PRECEDED BY THE CHALLENGE OF ITS DEFINITION. IT IS IMPOSSIBLE TO UNIQUELY DEFINE THE TERM CRYPTOCURRENCY. THE ENGLISH LANGUAGE DICTIONARY MERIAM WEBSTER DEFINES IT AS ANY FORM OF CURRENCY THAT ONLY EXISTS DIGITALLY, THAT USUALLY HAS NO CENTRAL ISSUING OR REGULATING AUTHORITY BUT INSTEAD USES A DECENTRALIZED SYSTEM TO RECORD TRANSACTIONS AND MANAGE THE ISSUANC…	STUDZIENIECKI, T KOZINA, M ALILOVIC, DS	#N/A	AVOCAT BARREAU GENEVE, GENEVA, SWITZERLAND; UNIVERSITY BANJA LUKA, FAC ECON, BANJA LUKA, BOSNIA & HERZEGOVINA;	CRYPTOCURRENCY; LEGAL REGULATION	#N/A	PROCEEDINGS PAPER	#N/A	EC SOC DEVELOP	#N/A	ENGLISH	VARAZDIN DEVELOPMENT & ENTREPRENEURSHIP AGENCY	2018	ZELIC, D (CORRESPONDING AUTHOR), AVOCAT BARREAU GENEVE, GENEVA, SWITZERLAND.	1849-6903	ECONOMIC AND SOCIAL DEVELOPMENT (ESD 2018): 33RD INTERNATIONAL SCIENTIFIC CONFERENCE ON ECONOMIC AND SOCIAL DEVELOPMENT "MANAGERIAL ISSUES IN MODERN BUSINESS"	2	CRYPTOCURRENCY GENERAL CHALLENGES OF LEGAL REGULATION AND THE SWISS MODEL OF REGULATION	#N/A	ISI	UNIVERSITY OF BANJA LUKA (UNIBL)	D (CORRESPONDING AUTHOR)	#N/A	ZELIC D, 2018, EC SOC DEVELOP	ZELIC D, 2018, EC SOC DEVELOP
ZIANKO VV, 2022, ACAD REV	ZIANKO V; NECHYPORENKO T; WALDSHMIDT I	ZIANKO, V. V.; NECHYPORENKO, T. D.; WALDSHMIDT, I. M.	ABRAMOWICZ M, 2016, RES PAP, DOI 10.2139/SSRN.2573788, DOI 10.2139/SSRN.2573788; ANONYMOUS, CASHLESS EC; ANONYMOUS, 2015, VIRTUAL CURRENCY SCH; ANONYMOUS, DIRECTIVE 2009110 EC;ANONYMOUS, CRYPTORATING; BIS MEMBER CENTRAL BANKS, BANK INT SETTLEMENTS; BISHOPS N, 2018, GLOBAL NATL EC PROBL, V22, P753; BONNEAU J, 2015, P IEEE S SECUR PRIV, P104, DOI 10.1109/SP.2015.14; COINMARKETCAP, CRYPTOCURRENCY MA…	IT HAS BEEN FOUND THAT THE DYNAMICS OF THE DEVELOPMENT OF THE DIGITAL MEDIA ENVIRONMENT DETERMINES THE EMERGENCE OF THE CRYPTO INDUSTRY BASED ON THE BLOCKCHAIN TECHNOLOGIES AND ASYMMETRIC ENCRYPTION OF TRANSACTIONS. THE AUTHORS STATE THAT THE CRYPTO INDUSTRY HAS BEEN GROWING THROUGH THE STAGES OF ADAPTATION, WHOSE FEATURES ARE INCREDIBLE DYNAMICS AND SPEED OF TRANSFORMATIONS. IT HAS BEEN ESTABLIS…	#N/A	#N/A	VINNYTSIA NATIONAL TECH UNIVERSITY, DEPT FINANCE & INNOVAT MANAGEMENT, VINNYTSIA, UKRAINE; VINNYTSIA TECH VOCAT COLLEGE, FINANCIAL & ECON DISCIPLINES, VINNYTSIA, UKRAINE; VINNYTSIA NATIONAL TECH UNIVERSITY, CHAIR FINANCE & INNOVAT MANAGEMENT, VINNYTSIA, UKRAINE;	CRYPTO; CRYPTOCURRENCY; BLOCKCHAIN; BITCOIN	10.32342/2074-5354-2022-2-57-6	ARTICLE	#N/A	ACAD REV	ACAD. REV.	ENGLISH	ALFRED NOBEL UNIV	2022	ZIANKO, VV (CORRESPONDING AUTHOR), VINNYTSIA NATL TECH UNIV, DEPT FINANCE & INNOVAT MANAGEMENT, VINNYTSIA, UKRAINE.	2074-5354	ACADEMY REVIEW	0	ADAPTATION MECHANISM OF THE CRYPTO INDUSTRY IN THE PROCESS OF VIRTUALIZATION OF FINANCIAL FLOWS	#N/A	ISI	MINISTRY OF EDUCATION AND SCIENCE OF UKRAINE; VINNYTSIA NATIONAL TECHNICAL UNIVERSITY; MINISTRY OF EDUCATION AND SCIENCE OF UKRAINE; VINNYTSIA NATIONAL TECHNICAL UNIVERSITY	VINNYTSIA NATL TECH UNIV	#N/A	ZIANKO VV, 2022, ACAD REV	ZIANKO VV, 2022, ACAD REV
